# Supplementary material for: Community Sampling and Integrative Taxonomy Reveal New Species and Host Specificity in the Army Ant-Associated Beetle Genus Tetradonia (Coleoptera, Staphylinidae, Aleocharinae)
Source: PubMed Central journal article supplement (PMC5102370; doi:10.1371/journal.pone.0165056), 2016-11-09
Supplement: pone.0165056.s001.pdf [file pone.0165056.s001.pdf]

**S1 Figure. Phylogeny of *Eciton*-associated *Tetradonia* beetles at La Selva Biological Station, Costa Rica.** A ‘Randomized Axelerated Maximum Likelihood’ (RAxML) analysis based on concatenated *COI*, *wg*, and *CSIAD* sequences was used for inferring the phylogenetic relationship of *Tetradonia* beetles. The tree was created using the software Geneious R9 (version 9.1.5) with the plugin RAxML (version 7.2.8). GTR GAMMA was chosen as the best-scoring nucleotide model as assessed by MEGA6 [1]. *Ecitomorpha arachnoides* (Staphylinidae: Aleocharinae: Ecitocharini), collected in a raid of *Eciton burchellii foreli*, served as outgroup. Bootstrap support values (1,000 replicates) are given at major nodes. The scale bar represents expected substitutions per site as inferred by the RAxML algorithm.

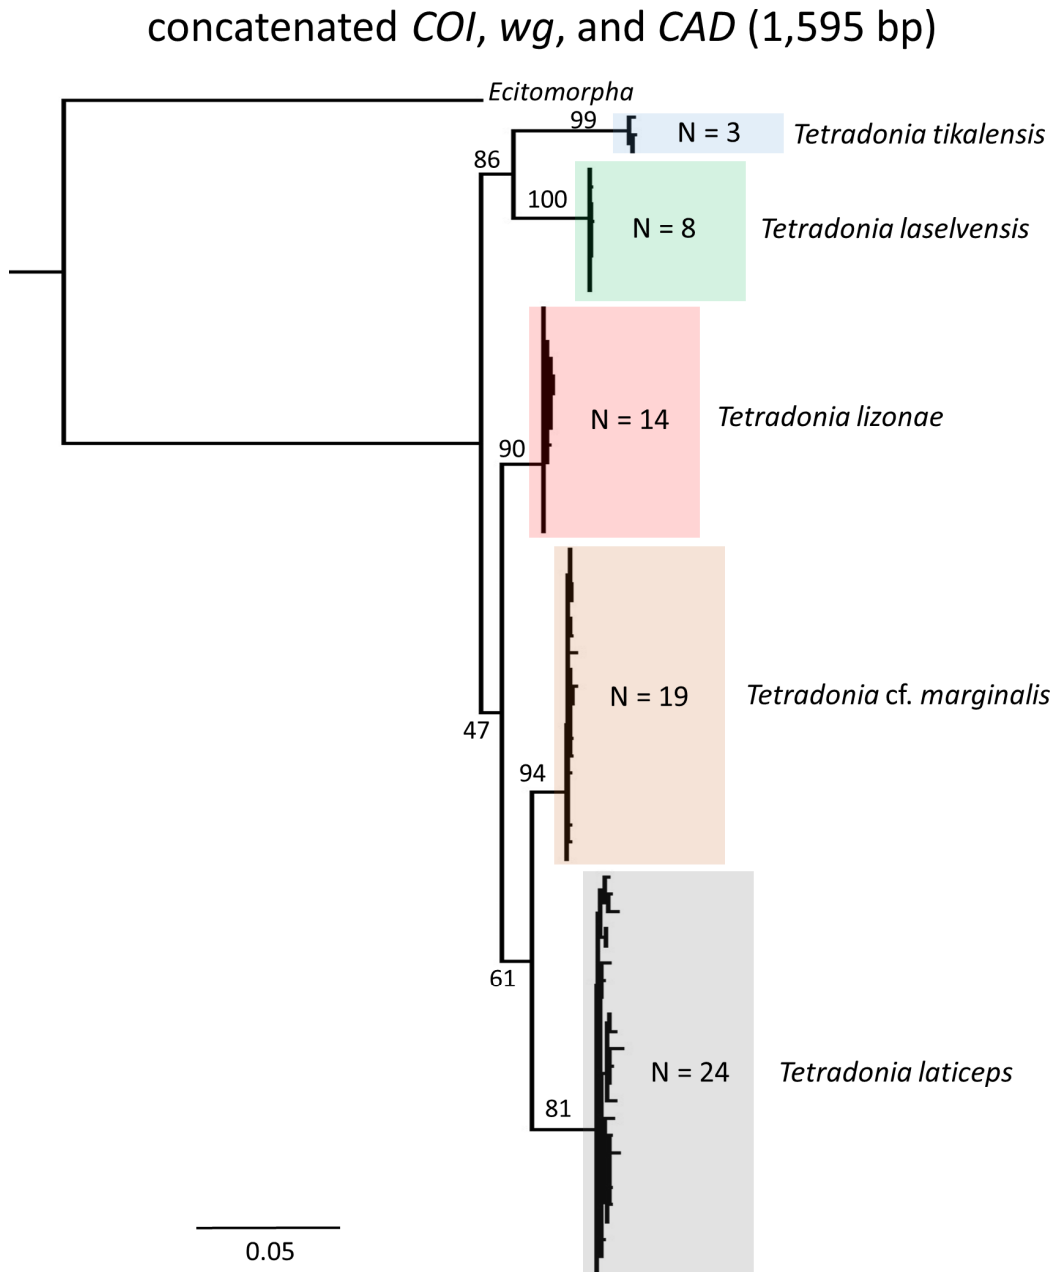

## **Reference**

1. Tamura K, Stecher G, Peterson D, Filipski A, Kumar S. MEGA6: Molecular Evolutionary Genetics Analysis version 6.0. *Mol. Biol. Evol.* 2013;30:2725–9.
