# Supplementary material for: Community Sampling and Integrative Taxonomy Reveal New Species and Host Specificity in the Army Ant-Associated Beetle Genus Tetradonia (Coleoptera, Staphylinidae, Aleocharinae)
Source: PubMed Central journal article supplement (PMC5102370; doi:10.1371/journal.pone.0165056), 2016-11-09

**S2 Figure. Absolute number of *Tetradonia* co-occurrence events at La Selva Biological Station, Costa Rica.** For each given species pair, white numbers depict the number of host colonies in which specimens of both species were found. For instance, *T. laticeps* and *T. marginalis* were found together in eight host colonies. Differential shading corresponds to the white numbers in cells. The white box depicts a value of zero. Abbreviations: *T. lat.* = *Tetradonia laticeps*, *T. mar.* = *Tetradonia* cf. *marginalis*, *T. tik.* = *Tetradonia tikalensis*, *T. las.* = *Tetradonia laselvensis*, *T. liz.* = *Tetradonia lizonae*.

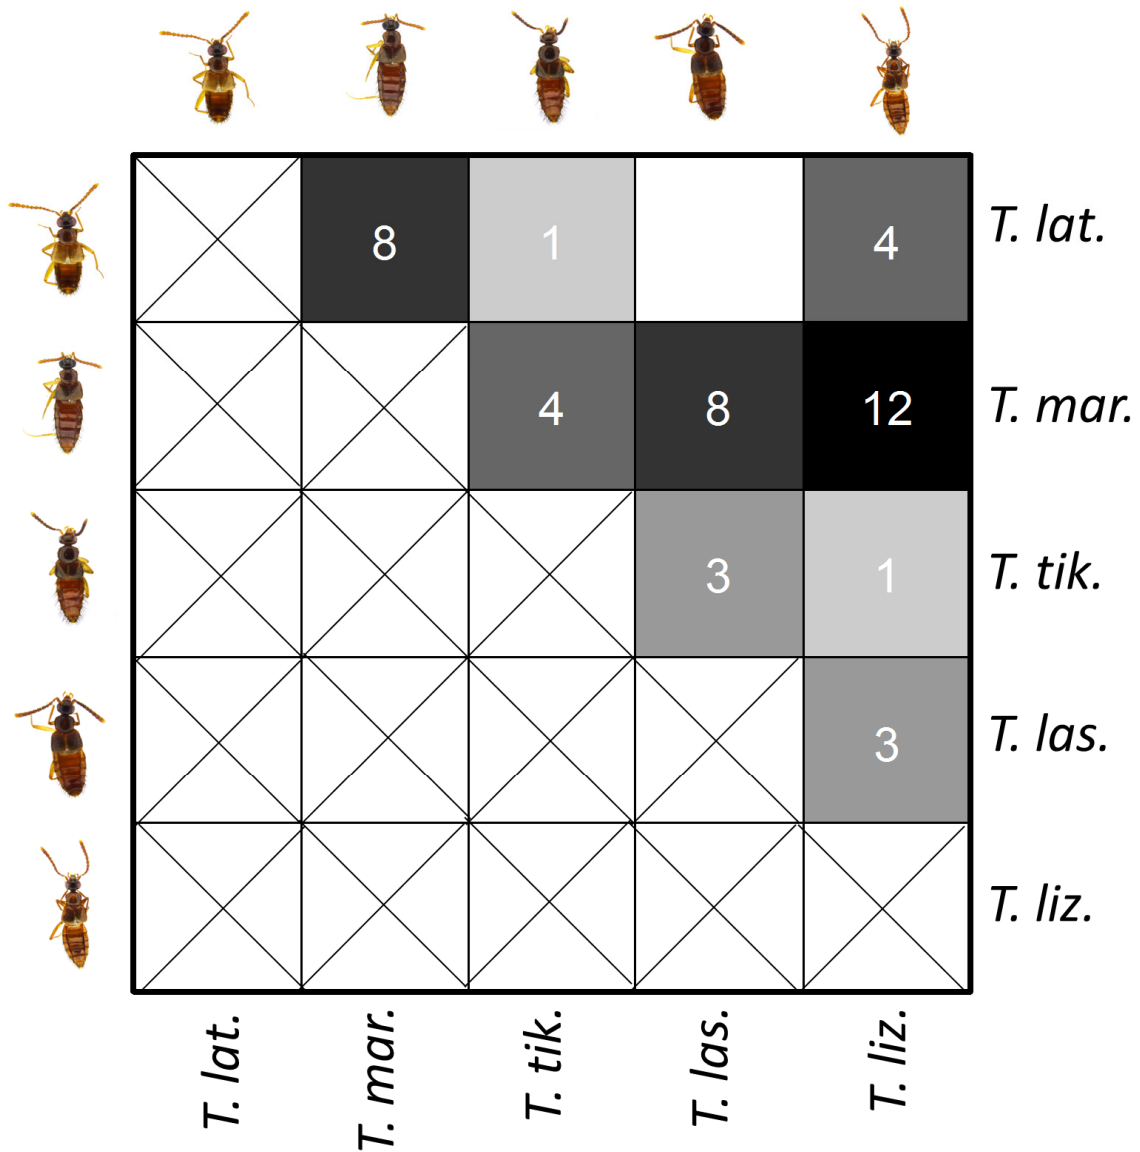

Supplement: pone.0165056.s002.pdf [file pone.0165056.s002.pdf]
