# Supplementary material for: Community Sampling and Integrative Taxonomy Reveal New Species and Host Specificity in the Army Ant-Associated Beetle Genus Tetradonia (Coleoptera, Staphylinidae, Aleocharinae)
Source: PubMed Central journal article supplement (PMC5102370; doi:10.1371/journal.pone.0165056), 2016-11-09
Supplement: pone.0165056.s004.pdf [file pone.0165056.s004.pdf]

**S2 Table. PCR primers used in this study.** Primer names in bold letters represent those primers that worked most consistently across samples for the different loci. Abbreviations: Ann. Temp. = Annealing Temperature.

| Primer name         | Target gene     | Reading direction | Sequence (5' – 3')               | Ann. Temp. range | Source     |
|---------------------|-----------------|-------------------|----------------------------------|------------------|------------|
| <b>CD667F</b>       | <i>CAD</i>      | forward           | GGATGGAAGGAAGTDGARTAYGARGT       | 50-57°C          | [1]        |
| CD828R              | <i>CAD</i>      | forward           | GCCATTACYTCNCCNACACTYTTTCAT      | 50-57°C          | [1]        |
| <b>CD843R_Tetra</b> | <i>CAD</i>      | reverse           | TTTGAAGAGGCTTTTCARAAAGC          | 50-57°C          | This study |
| CD851R              | <i>CAD</i>      | reverse           | GGATCGAAGCCATTHACATTYTCRCHACCAT  | 50-57°C          | [1]        |
| <b>LCO1490</b>      | <i>COI</i>      | forward           | GGTCAACAAATCATAAAGATATTGG        | 48-55°C          | [2]        |
| <b>HCO2198</b>      | <i>COI</i>      | reverse           | TAAACTTCAGGGTGACCAAAAATCA        | 48-55°C          | [2]        |
| Wg550F              | <i>wingless</i> | forward           | ATGCGTCAGGARTGYAARTGYCAYGGYATGTC | 50-60°C          | [1]        |
| Wg578F              | <i>wingless</i> | forward           | TGCACNGTGAARACYTGCTGGATG         | 50-60°C          | [1]        |
| <b>Wg578F_Tetra</b> | <i>wingless</i> | forward           | TGCACGGTGAAGACSTGCTGGATG         | 50-60°C          | This study |
| <b>WgAbrZ</b>       | <i>wingless</i> | reverse           | CACTTNACYTCRCARCACCARTG          | 50-60°C C        | [1]        |

## References

1. Wild AL, Maddison DR. Evaluating nuclear protein-coding genes for phylogenetic utility in beetles. *Mol. Phylogenet. Evol.* 2008;48:877–91.
2. Folmer O, Black M, Hoeh W, Lutz R, Vrijenhoek R. DNA primers for amplification of mitochondrial cytochrome c oxidase subunit I from diverse metazoan invertebrates. *Mol. Mar. Biol. Biotechnol.* 1994;3:294–9.
