# Supplementary material for: Community Sampling and Integrative Taxonomy Reveal New Species and Host Specificity in the Army Ant-Associated Beetle Genus Tetradonia (Coleoptera, Staphylinidae, Aleocharinae)
Source: PLoS One. 2016 Nov 9;11(11):e0165056. doi: 10.1371/journal.pone.0165056 (PMC5102370; doi:10.1371/journal.pone.0165056)
Supplement: S1 Table — (XLS) [file pone.0165056.s003.xls]

## Sheet: Specimen Information
Table S1. Specimen Information. Numbers in brackets give the number of ambiguous bases in a sequence. Abbreviations: ID = identification number; Seq. = Sequence; BOLD = Barcode of Life database; n.a. = not available
Sample ID	COI Seq. Length	COI Accession	CAD Seq. Length	CAD Accession	Wg Seq. Length	Wg Accession	Images on BOLD	Collection Date	Species	Life Stage	Collected from colony of …	Host colony ID	Sampling Protocol	Voucher Type	Depository	Notes
cvb119ecbi003	658[0n]	KX586175	646[1n]	KX586177	440[0n]	KX586176	0	25-Feb-2013	Ecitomorpha arachnoides	adult	Eciton burchellii	colony ID EB01	collected during host colony raid	vouchered: private collection	Personal Collection of Christoph Von Beeren	Note that Kistner and Jacobson synonymized three species under a single species, E. arachnoides. We can well distinguish E. nevermanni and E. breviceps described by Reichensperger. Hence, the synonymies seem to be wrong. The present specimen correspond to E. nevermanni.
cvb529tetr005	658[0n]	KX419797	0	n.a.	0	n.a.	0	06-Apr-2013	Tetradonia laselvensis	adult	Eciton burchellii	colony ID EB9	collected during host colony raid	museum vouchered:paratype	Kyushu University, Museum	specimen were first sort into genetic clades and later 20 specimens of each clades were morphologically identified
cvb308tetr008	658[0n]	KX419796	0	n.a.	0	n.a.	0	16-Mar-2013	Tetradonia laselvensis	adult	Eciton burchellii	colony ID EB8	collected during host colony emigration	museum vouchered:paratype	Kyushu University, Museum	specimen were first sort into genetic clades and later 20 specimens of each clades were morphologically identified
cvb308tetr007	658[0n]	KX419795	0	n.a.	0	n.a.	0	16-Mar-2013	Tetradonia laselvensis	adult	Eciton burchellii	colony ID EB8	collected during host colony emigration	museum vouchered:paratype	Kyushu University, Museum	specimen were first sort into genetic clades and later 20 specimens of each clades were morphologically identified
cvb308tetr006	658[0n]	KX419794	0	n.a.	0	n.a.	0	16-Mar-2013	Tetradonia laselvensis	adult	Eciton burchellii	colony ID EB8	collected during host colony emigration	museum vouchered:paratype	Kyushu University, Museum	specimen were first sort into genetic clades and later 20 specimens of each clades were morphologically identified
cvb541tetr003	658[0n]	KX419799	503[2n]	KX420251	432[0n]	KX420155	0	07-Apr-2013	Tetradonia laselvensis	adult	Eciton hamatum	colony ID EH10	collected during host colony emigration	vouchered: private collection	Personal Collection of Christoph Von Beeren	specimen were first sort into genetic clades and later 20 specimens of each clades were morphologically identified
cvb176tetr001	658[0n]	KX419800	502[3n]	KX420252	431[1n]	KX420156	0	03-Mar-2013	Tetradonia laselvensis	adult	Eciton burchellii	colony ID EB5	collected during host colony raid	museum vouchered:paratype	Kyushu University, Museum	specimen were first sort into genetic clades and later 20 specimens of each clades were morphologically identified
cvb572tetr006	658[0n]	KX419798	0	n.a.	0	n.a.	0	08-Apr-2013	Tetradonia laselvensis	adult	Eciton burchellii	colony ID EB11	collected during host colony emigration	museum vouchered:paratype	Field Museum of Natural History, Chicago	specimen were first sort into genetic clades and later 20 specimens of each clades were morphologically identified
cvb176tetr003	658[0n]	KX419801	504[1n]	KX420253	432[0n]	KX420157	0	03-Mar-2013	Tetradonia laselvensis	adult	Eciton burchellii	colony ID EB5	collected during host colony raid	museum vouchered:paratype	Kyushu University, Museum	specimen were first sort into genetic clades and later 20 specimens of each clades were morphologically identified
cvb541tetr007	658[0n]	KX419793	0	n.a.	0	n.a.	0	21-Mar-2013	Tetradonia laselvensis	adult	Eciton hamatum	colony ID EH6	collected during host colony emigration	museum vouchered:holotype	Kyushu University, Museum	specimen were first sort into genetic clades and later 20 specimens of each clades were morphologically identified
cvb399tetr004	658[0n]	KX419790	502[3n]	KX420248	432[0n]	KX420152	0	21-Mar-2013	Tetradonia laselvensis	adult	Eciton hamatum	colony ID EH6	collected during host colony emigration	museum vouchered:paratype	Connecticut State Museum of Natural History	specimen were first sort into genetic clades and later 20 specimens of each clades were morphologically identified
cvb104tetr005	658[0n]	KX419791	502[3n]	KX420249	432[0n]	KX420153	0	21-Feb-2013	Tetradonia laselvensis	adult	Eciton lucanoides	colony ID EL2	collected during host colony emigration	museum vouchered:paratype	Connecticut State Museum of Natural History	specimen were first sort into genetic clades and later 20 specimens of each clades were morphologically identified
cvb529tetr001	658[0n]	KX419802	502[3n]	KX420254	432[0n]	KX420158	0	06-Apr-2013	Tetradonia laselvensis	adult	Eciton burchellii	colony ID EB9	collected during host colony raid	museum vouchered:paratype	Kyushu University, Museum	specimen were first sort into genetic clades and later 20 specimens of each clades were morphologically identified
cvb529tetr003	658[0n]	KX419803	502[3n]	KX420255	431[1n]	KX420159	0	06-Apr-2013	Tetradonia laselvensis	adult	Eciton burchellii	colony ID EB9	collected during host colony raid	museum vouchered:paratype	Kyushu University, Museum	specimen were first sort into genetic clades and later 20 specimens of each clades were morphologically identified
cvb104tetr001	658[0n]	KX419804	503[2n]	KX420256	431[1n]	KX420160	2	21-Feb-2013	Tetradonia laselvensis	adult	Eciton lucanoides	colony ID EL2	collected during host colony emigration	museum vouchered:paratype	Kyushu University, Museum	specimen were first sort into genetic clades and later 20 specimens of each clades were morphologically identified
cvb606tetr003	658[0n]	KX419792	502[2n]	KX420250	431[1n]	KX420154	0	23-Mar-2014	Tetradonia laselvensis	adult	Eciton hamatum	colony ID EH12	collected during host colony emigration	museum vouchered:paratype	Field Museum of Natural History, Chicago	specimen were first sort into genetic clades and later 20 specimens of each clades were morphologically identified
cvb692tetr003	658[0n]	KX419871	0	n.a.	0	n.a.	0	04-May-2014	Tetradonia laticeps	adult	Eciton mexicanum	colony ID EM9	collected during host colony emigration	vouchered: private collection	Personal Collection of Christoph Von Beeren	specimen were first sort into genetic clades and later 20 specimens of each clades were morphologically identified
cvb692tetr002	658[0n]	KX419872	0	n.a.	0	n.a.	0	04-May-2014	Tetradonia laticeps	adult	Eciton mexicanum	colony ID EM9	collected during host colony emigration	vouchered: private collection	Personal Collection of Christoph Von Beeren	specimen were first sort into genetic clades and later 20 specimens of each clades were morphologically identified
cvb692tetr001	658[0n]	KX419873	0	n.a.	0	n.a.	0	04-May-2014	Tetradonia laticeps	adult	Eciton mexicanum	colony ID EM9	collected during host colony emigration	vouchered: private collection	Personal Collection of Christoph Von Beeren	specimen were first sort into genetic clades and later 20 specimens of each clades were morphologically identified
cvb591tetr005	658[0n]	KX419874	0	n.a.	0	n.a.	0	19-Mar-2014	Tetradonia laticeps	adult	Eciton mexicanum	colony ID EM6	collected during host colony emigration	vouchered: private collection	Personal Collection of Christoph Von Beeren	specimen were first sort into genetic clades and later 20 specimens of each clades were morphologically identified
cvb591tetr004	658[0n]	KX419875	0	n.a.	0	n.a.	0	19-Mar-2014	Tetradonia laticeps	adult	Eciton mexicanum	colony ID EM6	collected during host colony emigration	vouchered: private collection	Personal Collection of Christoph Von Beeren	specimen were first sort into genetic clades and later 20 specimens of each clades were morphologically identified
cvb591tetr003	658[0n]	KX419876	0	n.a.	0	n.a.	0	19-Mar-2014	Tetradonia laticeps	adult	Eciton mexicanum	colony ID EM6	collected during host colony emigration	vouchered: private collection	Personal Collection of Christoph Von Beeren	specimen were first sort into genetic clades and later 20 specimens of each clades were morphologically identified
cvb591tetr002	658[0n]	KX419877	0	n.a.	0	n.a.	0	19-Mar-2014	Tetradonia laticeps	adult	Eciton mexicanum	colony ID EM6	collected during host colony emigration	vouchered: private collection	Personal Collection of Christoph Von Beeren	specimen were first sort into genetic clades and later 20 specimens of each clades were morphologically identified
cvb591tetr001	658[0n]	KX419878	0	n.a.	0	n.a.	0	19-Mar-2014	Tetradonia laticeps	adult	Eciton mexicanum	colony ID EM6	collected during host colony emigration	vouchered: private collection	Personal Collection of Christoph Von Beeren	specimen were first sort into genetic clades and later 20 specimens of each clades were morphologically identified
cvb718tetr004	658[0n]	KX419881	0	n.a.	0	n.a.	0	14-Apr-2014	Tetradonia laticeps	adult	Eciton dulcium	colony ID ED11	collected during host colony emigration	vouchered: private collection	Personal Collection of Christoph Von Beeren	specimen were first sort into genetic clades and later 20 specimens of each clades were morphologically identified
cvb718tetr005	658[0n]	KX419880	0	n.a.	0	n.a.	0	14-Apr-2014	Tetradonia laticeps	adult	Eciton dulcium	colony ID ED11	collected during host colony emigration	vouchered: private collection	Personal Collection of Christoph Von Beeren	specimen were first sort into genetic clades and later 20 specimens of each clades were morphologically identified
cvb718sta001	658[0n]	KX419879	0	n.a.	0	n.a.	0	14-Apr-2014	Tetradonia laticeps	adult	Eciton dulcium	colony ID ED11	collected during host colony emigration	vouchered: private collection	Personal Collection of Christoph Von Beeren	specimen were first sort into genetic clades and later 20 specimens of each clades were morphologically identified
cvb591tetr011	658[0n]	KX419809	0	n.a.	0	n.a.	0	19-Mar-2014	Tetradonia laticeps	adult	Eciton mexicanum	colony ID EM6	collected during host colony emigration	vouchered: private collection	Personal Collection of Christoph Von Beeren	specimen were first sort into genetic clades and later 20 specimens of each clades were morphologically identified
cvb271tetr002	658[0n]	KX419923	498[7n]	KX420275	429[3n]	KX420179	0	12-Mar-2013	Tetradonia laticeps	adult	Eciton vagans	colony ID EV5	collected during host colony emigration	vouchered: private collection	Personal Collection of Christoph Von Beeren	specimen were first sort into genetic clades and later 20 specimens of each clades were morphologically identified
cvb098tetr001	658[0n]	KX419922	505[0n]	KX420274	429[3n]	KX420178	0	19-Feb-2013	Tetradonia laticeps	adult	Eciton dulcium	colony ID ED1	collected during host colony emigration	vouchered: private collection	Personal Collection of Christoph Von Beeren	specimen were first sort into genetic clades and later 20 specimens of each clades were morphologically identified
cvb095tetr001	658[0n]	KX419921	534[1n]	KX420273	430[2n]	KX420177	0	18-Feb-2013	Tetradonia laticeps	adult	Eciton dulcium	colony ID ED1	collected during host colony emigration	vouchered: private collection	Personal Collection of Christoph Von Beeren	specimen were first sort into genetic clades and later 20 specimens of each clades were morphologically identified
cvb730tetr011	658[0n]	KX419810	0	n.a.	0	n.a.	0	18-Apr-2014	Tetradonia laticeps	adult	Eciton mexicanum	colony ID EM11	collected during host colony emigration	museum vouchered	Kyushu University, Museum	specimen were first sort into genetic clades and later 20 specimens of each clades were morphologically identified
cvb002tetr001	658[0n]	KX419935	548[6n]	KX420286	431[1n]	KX420188	0	07-Feb-2013	Tetradonia laticeps	adult	Eciton mexicanum	colony ID EM1	collected during host colony emigration	vouchered: private collection	Personal Collection of Christoph Von Beeren	specimen were first sort into genetic clades and later 20 specimens of each clades were morphologically identified
cvb095tetr002	658[0n]	KX419920	502[3n]	KX420272	431[1n]	KX420176	0	18-Feb-2013	Tetradonia laticeps	adult	Eciton dulcium	colony ID ED1	collected during host colony emigration	vouchered: private collection	Personal Collection of Christoph Von Beeren	specimen were first sort into genetic clades and later 20 specimens of each clades were morphologically identified
cvb095tetr003	658[0n]	KX419919	499[6n]	KX420271	430[2n]	KX420175	0	18-Feb-2013	Tetradonia laticeps	adult	Eciton dulcium	colony ID ED1	collected during host colony emigration	vouchered: private collection	Personal Collection of Christoph Von Beeren	specimen were first sort into genetic clades and later 20 specimens of each clades were morphologically identified
cvb095tetr004	658[0n]	KX419918	505[0n]	KX420270	430[2n]	KX420174	0	18-Feb-2013	Tetradonia laticeps	adult	Eciton dulcium	colony ID ED1	collected during host colony emigration	vouchered: private collection	Personal Collection of Christoph Von Beeren	specimen were first sort into genetic clades and later 20 specimens of each clades were morphologically identified
cvb193tetr001	658[0n]	KX419917	0	n.a.	430[2n]	KX420173	0	04-Mar-2013	Tetradonia laticeps	adult	Eciton dulcium	colony ID ED3	collected during host colony emigration	vouchered: private collection	Personal Collection of Christoph Von Beeren	specimen were first sort into genetic clades and later 20 specimens of each clades were morphologically identified
cvb048tetr007	658[0n]	KX419814	0	n.a.	0	n.a.	5	14-Feb-2013	Tetradonia laticeps	adult	Eciton hamatum	colony ID EH3	collected during host colony emigration	museum vouchered	Kyushu University, Museum	specimen were first sort into genetic clades and later 20 specimens of each clades were morphologically identified
cvb193tetr002	658[0n]	KX419916	497[8n]	KX420269	431[1n]	KX420172	0	04-Mar-2013	Tetradonia laticeps	adult	Eciton dulcium	colony ID ED3	collected during host colony emigration	vouchered: private collection	Personal Collection of Christoph Von Beeren	specimen were first sort into genetic clades and later 20 specimens of each clades were morphologically identified
cvb002tetr002	658[0n]	KX419934	498[7n]	KX420285	430[2n]	KX420187	0	07-Feb-2013	Tetradonia laticeps	adult	Eciton mexicanum	colony ID EM1	collected during host colony emigration	vouchered: private collection	Personal Collection of Christoph Von Beeren	specimen were first sort into genetic clades and later 20 specimens of each clades were morphologically identified
cvb701tetr015	658[0n]	KX419811	0	n.a.	0	n.a.	0	07-Apr-2014	Tetradonia laticeps	adult	Eciton dulcium	colony ID ED9	collected during host colony emigration	museum vouchered	Kyushu University, Museum	specimen were first sort into genetic clades and later 20 specimens of each clades were morphologically identified
cvb094tetr001	658[0n]	KX419812	0	n.a.	0	n.a.	0	18-Feb-2013	Tetradonia laticeps	adult	Eciton dulcium	colony ID ED1	collected during host colony emigration	museum vouchered	Kyushu University, Museum	specimen were first sort into genetic clades and later 20 specimens of each clades were morphologically identified
cvb002tetr003	658[0n]	KX419933	500[5n]	KX420284	0	n.a.	0	07-Feb-2013	Tetradonia laticeps	adult	Eciton mexicanum	colony ID EM1	collected during host colony emigration	museum vouchered	Kyushu University, Museum	specimen were first sort into genetic clades and later 20 specimens of each clades were morphologically identified
cvb194tetr001	658[0n]	KX419932	500[5n]	KX420283	432[0n]	KX420186	0	04-Mar-2013	Tetradonia laticeps	adult	Eciton vagans	colony ID Ev4	collected during host colony emigration	vouchered: private collection	Personal Collection of Christoph Von Beeren	specimen were first sort into genetic clades and later 20 specimens of each clades were morphologically identified
cvb106st004	658[0n]	KX419805	0	n.a.	0	n.a.	0	21-Feb-2013	Tetradonia laticeps	adult	Neivamyrmex gibbatus	colony ID NG05	collected during host colony emigration	museum vouchered	Connecticut State Museum of Natural History	specimen were first sort into genetic clades and later 20 specimens of each clades were morphologically identified
cvb178tetr001	658[0n]	KX419931	505[0n]	KX420282	431[1n]	KX420185	0	03-Mar-2013	Tetradonia laticeps	adult	Eciton dulcium	colony ID ED2	collected during host colony emigration	vouchered: private collection	Personal Collection of Christoph Von Beeren	specimen were first sort into genetic clades and later 20 specimens of each clades were morphologically identified
cvb730tetr010	658[0n]	KX419813	0	n.a.	0	n.a.	0	18-Apr-2014	Tetradonia laticeps	adult	Eciton mexicanum	colony ID EM11	collected during host colony emigration	museum vouchered	Kyushu University, Museum	specimen were first sort into genetic clades and later 20 specimens of each clades were morphologically identified
cvb178tetr002	658[0n]	KX419930	0	n.a.	0	n.a.	0	03-Mar-2013	Tetradonia laticeps	adult	Eciton dulcium	colony ID ED2	collected during host colony emigration	vouchered: private collection	Personal Collection of Christoph Von Beeren	specimen were first sort into genetic clades and later 20 specimens of each clades were morphologically identified
cvb193tetr003	658[0n]	KX419915	498[7n]	KX420268	430[2n]	KX420171	0	04-Mar-2013	Tetradonia laticeps	adult	Eciton dulcium	colony ID ED3	collected during host colony emigration	vouchered: private collection	Personal Collection of Christoph Von Beeren	specimen were first sort into genetic clades and later 20 specimens of each clades were morphologically identified
cvb676tetr009	658[0n]	KX419815	0	n.a.	0	n.a.	0	31-Mar-2014	Tetradonia laticeps	adult	Eciton hamatum	colony ID EH13	collected during host colony emigration	museum vouchered	Kyushu University, Museum	specimen were first sort into genetic clades and later 20 specimens of each clades were morphologically identified
cvb178tetr003	658[0n]	KX419929	496[9n]	KX420281	432[0n]	KX420184	2	03-Mar-2013	Tetradonia laticeps	adult	Eciton dulcium	colony ID ED2	collected during host colony emigration	museum vouchered	Field Museum of Natural History, Chicago	specimen were first sort into genetic clades and later 20 specimens of each clades were morphologically identified
cvb537tetr001	658[0n]	KX419928	497[8n]	KX420280	431[1n]	KX420183	8	06-Apr-2013	Tetradonia laticeps	adult	Eciton dulcium	colony ID ED5	collected during host colony emigration	museum vouchered	Kyushu University, Museum	specimen were first sort into genetic clades and later 20 specimens of each clades were morphologically identified
cvb398tetr001	658[0n]	KX419914	505[0n]	KX420267	0	n.a.	0	21-Mar-2013	Tetradonia laticeps	adult	Eciton vagans	colony ID EV3	collected during host colony emigration	vouchered: private collection	Personal Collection of Christoph Von Beeren	specimen were first sort into genetic clades and later 20 specimens of each clades were morphologically identified
cvb537tetr002	658[0n]	KX419927	505[0n]	KX420279	431[1n]	KX420182	0	06-Apr-2013	Tetradonia laticeps	adult	Eciton dulcium	colony ID ED5	collected during host colony emigration	vouchered: private collection	Personal Collection of Christoph Von Beeren	specimen were first sort into genetic clades and later 20 specimens of each clades were morphologically identified
cvb106st003	658[0n]	KX419806	0	n.a.	0	n.a.	0	21-Feb-2013	Tetradonia laticeps	adult	Neivamyrmex gibbatus	colony ID NG05	collected during host colony emigration	museum vouchered	Connecticut State Museum of Natural History	specimen were first sort into genetic clades and later 20 specimens of each clades were morphologically identified
cvb537tetr003	658[0n]	KX419926	528[1n]	KX420278	431[1n]	KX420181	0	06-Apr-2013	Tetradonia laticeps	adult	Eciton dulcium	colony ID ED5	collected during host colony emigration	vouchered: private collection	Personal Collection of Christoph Von Beeren	specimen were first sort into genetic clades and later 20 specimens of each clades were morphologically identified
cvb106st002	658[0n]	KX419807	0	n.a.	0	n.a.	0	21-Feb-2013	Tetradonia laticeps	adult	Neivamyrmex gibbatus	colony ID NG05	collected during host colony emigration	museum vouchered	Kyushu University, Museum	specimen were first sort into genetic clades and later 20 specimens of each clades were morphologically identified
cvb049tetr001	658[0n]	KX419913	499[6n]	KX420266	431[1n]	KX420170	0	14-Feb-2013	Tetradonia laticeps	adult	collected from Eciton (species not determined)	colony ID EU1	collected during host colony raid	vouchered: private collection	Personal Collection of Christoph Von Beeren	specimen were first sort into genetic clades and later 20 specimens of each clades were morphologically identified
cvb106st001	658[0n]	KX419808	0	n.a.	0	n.a.	0	21-Feb-2013	Tetradonia laticeps	adult	Neivamyrmex gibbatus	colony ID NG05	collected during host colony emigration	museum vouchered	Kyushu University, Museum	specimen were first sort into genetic clades and later 20 specimens of each clades were morphologically identified
cvb049tetr002	658[0n]	KX419912	505[0n]	KX420265	431[1n]	KX420169	0	14-Feb-2013	Tetradonia laticeps	adult	collected from Eciton (species not determined)	colony ID EU1	collected during host colony raid	vouchered: private collection	Personal Collection of Christoph Von Beeren	specimen were first sort into genetic clades and later 20 specimens of each clades were morphologically identified
cvb049tetr003	658[0n]	KX419911	0	n.a.	0	n.a.	0	14-Feb-2013	Tetradonia laticeps	adult	collected from Eciton (species not determined)	colony ID EU1	collected during host colony raid	vouchered: private collection	Personal Collection of Christoph Von Beeren	specimen were first sort into genetic clades and later 20 specimens of each clades were morphologically identified
cvb178tetr004	658[0n]	KX419910	496[9n]	KX420264	432[0n]	KX420168	0	03-Mar-2013	Tetradonia laticeps	adult	Eciton dulcium	colony ID ED2	collected during host colony emigration	vouchered: private collection	Personal Collection of Christoph Von Beeren	specimen were first sort into genetic clades and later 20 specimens of each clades were morphologically identified
cvb178tetr005	658[0n]	KX419909	499[6n]	KX420263	429[3n]	KX420167	0	03-Mar-2013	Tetradonia laticeps	adult	Eciton dulcium	colony ID ED2	collected during host colony emigration	museum vouchered	Field Museum of Natural History, Chicago	specimen were first sort into genetic clades and later 20 specimens of each clades were morphologically identified
cvb193tetr004	658[0n]	KX419908	496[9n]	KX420262	431[1n]	KX420166	0	04-Mar-2013	Tetradonia laticeps	adult	Eciton dulcium	colony ID ED3	collected during host colony emigration	vouchered: private collection	Personal Collection of Christoph Von Beeren	specimen were first sort into genetic clades and later 20 specimens of each clades were morphologically identified
cvb193tetr005	658[0n]	KX419907	521[7n]	KX420261	430[2n]	KX420165	0	04-Mar-2013	Tetradonia laticeps	adult	Eciton dulcium	colony ID ED3	collected during host colony emigration	vouchered: private collection	Personal Collection of Christoph Von Beeren	specimen were first sort into genetic clades and later 20 specimens of each clades were morphologically identified
cvb537tetr004	658[0n]	KX419906	496[9n]	KX420260	431[1n]	KX420164	0	06-Apr-2013	Tetradonia laticeps	adult	Eciton dulcium	colony ID ED5	collected during host colony emigration	museum vouchered	Kyushu University, Museum	specimen were first sort into genetic clades and later 20 specimens of each clades were morphologically identified
cvb537tetr005	658[0n]	KX419905	497[8n]	KX420259	430[2n]	KX420163	0	06-Apr-2013	Tetradonia laticeps	adult	Eciton dulcium	colony ID ED5	collected during host colony emigration	vouchered: private collection	Personal Collection of Christoph Von Beeren	specimen were first sort into genetic clades and later 20 specimens of each clades were morphologically identified
cvb001tetr001	658[0n]	KX419904	500[5n]	KX420258	430[2n]	KX420162	0	07-Feb-2013	Tetradonia laticeps	adult	Eciton mexicanum	colony ID EM1	collected during host colony emigration	vouchered: private collection	Personal Collection of Christoph Von Beeren	specimen were first sort into genetic clades and later 20 specimens of each clades were morphologically identified
cvb001tetr002	658[0n]	KX419903	502[3n]	KX420257	432[0n]	KX420161	0	07-Feb-2013	Tetradonia laticeps	adult	Eciton mexicanum	colony ID EM1	collected during host colony emigration	vouchered: private collection	Personal Collection of Christoph Von Beeren	specimen were first sort into genetic clades and later 20 specimens of each clades were morphologically identified
cvb689tetr002	658[0n]	KX419902	0	n.a.	0	n.a.	0	04-Apr-2014	Tetradonia laticeps	adult	Eciton hamatum	colony ID EH14	collected during host colony emigration	vouchered: private collection	Personal Collection of Christoph Von Beeren	specimen were first sort into genetic clades and later 20 specimens of each clades were morphologically identified
cvb020tetr007	658[0n]	KX419816	0	n.a.	0	n.a.	0	10-Feb-2013	Tetradonia laticeps	adult	Eciton burchellii	colony ID EB3	collected during host colony emigration	vouchered: private collection	Personal Collection of Christoph Von Beeren	specimen were first sort into genetic clades and later 20 specimens of each clades were morphologically identified
cvb020tetr006	658[0n]	KX419817	0	n.a.	0	n.a.	0	10-Feb-2013	Tetradonia laticeps	adult	Eciton burchellii	colony ID EB3	collected during host colony emigration	museum vouchered	Kyushu University, Museum	specimen were first sort into genetic clades and later 20 specimens of each clades were morphologically identified
cvb689tetr005	658[0n]	KX419901	0	n.a.	0	n.a.	0	04-Apr-2014	Tetradonia laticeps	adult	Eciton hamatum	colony ID EH14	collected during host colony emigration	vouchered: private collection	Personal Collection of Christoph Von Beeren	specimen were first sort into genetic clades and later 20 specimens of each clades were morphologically identified
cvb595tetr001	658[0n]	KX419900	0	n.a.	0	n.a.	0	21-Mar-2014	Tetradonia laticeps	adult	Eciton dulcium	colony ID ED6	collected during host colony emigration	vouchered: private collection	Personal Collection of Christoph Von Beeren	specimen were first sort into genetic clades and later 20 specimens of each clades were morphologically identified
cvb595tetr002	658[0n]	KX419899	0	n.a.	0	n.a.	0	21-Mar-2014	Tetradonia laticeps	adult	Eciton dulcium	colony ID ED6	collected during host colony emigration	vouchered: private collection	Personal Collection of Christoph Von Beeren	specimen were first sort into genetic clades and later 20 specimens of each clades were morphologically identified
cvb618tetr001	658[0n]	KX419898	0	n.a.	0	n.a.	0	24-Mar-2014	Tetradonia laticeps	adult	Eciton dulcium	colony ID ED7	collected during host colony emigration	vouchered: private collection	Personal Collection of Christoph Von Beeren	specimen were first sort into genetic clades and later 20 specimens of each clades were morphologically identified
cvb038tetr010	658[0n]	KX419818	0	n.a.	0	n.a.	0	12-Feb-2013	Tetradonia laticeps	adult	Eciton burchellii	colony ID EB1	collected during host colony emigration	museum vouchered	Kyushu University, Museum	specimen were first sort into genetic clades and later 20 specimens of each clades were morphologically identified
cvb638tetr001	658[0n]	KX419897	0	n.a.	0	n.a.	0	30-Mar-2014	Tetradonia laticeps	adult	Eciton dulcium	colony ID ED8	collected during host colony emigration	vouchered: private collection	Personal Collection of Christoph Von Beeren	specimen were first sort into genetic clades and later 20 specimens of each clades were morphologically identified
cvb638tetr002	658[0n]	KX419896	0	n.a.	0	n.a.	0	30-Mar-2014	Tetradonia laticeps	adult	Eciton dulcium	colony ID ED8	collected during host colony emigration	vouchered: private collection	Personal Collection of Christoph Von Beeren	specimen were first sort into genetic clades and later 20 specimens of each clades were morphologically identified
cvb638tetr003	658[0n]	KX419895	0	n.a.	0	n.a.	0	30-Mar-2014	Tetradonia laticeps	adult	Eciton dulcium	colony ID ED8	collected during host colony emigration	vouchered: private collection	Personal Collection of Christoph Von Beeren	specimen were first sort into genetic clades and later 20 specimens of each clades were morphologically identified
cvb750tetr006	658[0n]	KX419819	0	n.a.	0	n.a.	0	27-Apr-2014	Tetradonia laticeps	adult	Eciton vagans	colony ID EV9	collected during host colony emigration	vouchered: private collection	Personal Collection of Christoph Von Beeren	specimen were first sort into genetic clades and later 20 specimens of each clades were morphologically identified
cvb747tetr006	658[0n]	KX419820	0	n.a.	0	n.a.	4	24-Apr-2014	Tetradonia laticeps	adult	Eciton vagans	colony ID EV8	collected during host colony emigration	vouchered: private collection	Personal Collection of Christoph Von Beeren	specimen were first sort into genetic clades and later 20 specimens of each clades were morphologically identified
cvb747tetr005	658[0n]	KX419821	0	n.a.	0	n.a.	0	24-Apr-2014	Tetradonia laticeps	adult	Eciton vagans	colony ID EV8	collected during host colony emigration	vouchered: private collection	Personal Collection of Christoph Von Beeren	specimen were first sort into genetic clades and later 20 specimens of each clades were morphologically identified
cvb638tetr004	658[0n]	KX419894	0	n.a.	0	n.a.	0	30-Mar-2014	Tetradonia laticeps	adult	Eciton dulcium	colony ID ED8	collected during host colony emigration	vouchered: private collection	Personal Collection of Christoph Von Beeren	specimen were first sort into genetic clades and later 20 specimens of each clades were morphologically identified
cvb097tetr006	658[0n]	KX419822	0	n.a.	0	n.a.	0	19-Feb-2013	Tetradonia laticeps	adult	Eciton lucanoides	colony ID EL1	collected during host colony emigration	vouchered: private collection	Personal Collection of Christoph Von Beeren	specimen were first sort into genetic clades and later 20 specimens of each clades were morphologically identified
cvb638tetr005	658[0n]	KX419893	0	n.a.	0	n.a.	0	30-Mar-2014	Tetradonia laticeps	adult	Eciton dulcium	colony ID ED8	collected during host colony emigration	vouchered: private collection	Personal Collection of Christoph Von Beeren	specimen were first sort into genetic clades and later 20 specimens of each clades were morphologically identified
cvb722tetr001	658[0n]	KX419823	0	n.a.	0	n.a.	0	15-Apr-2014	Tetradonia laticeps	adult	Eciton mexicanum	colony ID EM10	collected during host colony emigration	vouchered: private collection	Personal Collection of Christoph Von Beeren	specimen were first sort into genetic clades and later 20 specimens of each clades were morphologically identified
cvb701tetr001	658[0n]	KX419892	0	n.a.	0	n.a.	0	07-Apr-2014	Tetradonia laticeps	adult	Eciton dulcium	colony ID ED9	collected during host colony emigration	vouchered: private collection	Personal Collection of Christoph Von Beeren	specimen were first sort into genetic clades and later 20 specimens of each clades were morphologically identified
cvb097tetr004	658[0n]	KX419925	497[8n]	KX420277	0	n.a.	0	19-Feb-2013	Tetradonia laticeps	adult	Eciton lucanoides	colony ID EL1	collected during host colony emigration	museum vouchered	Kyushu University, Museum	specimen were first sort into genetic clades and later 20 specimens of each clades were morphologically identified
cvb701tetr010	658[0n]	KX419824	0	n.a.	0	n.a.	0	07-Apr-2014	Tetradonia laticeps	adult	Eciton dulcium	colony ID ED9	collected during host colony emigration	vouchered: private collection	Personal Collection of Christoph Von Beeren	specimen were first sort into genetic clades and later 20 specimens of each clades were morphologically identified
cvb701tetr009	658[0n]	KX419825	0	n.a.	0	n.a.	0	07-Apr-2014	Tetradonia laticeps	adult	Eciton dulcium	colony ID ED9	collected during host colony emigration	vouchered: private collection	Personal Collection of Christoph Von Beeren	specimen were first sort into genetic clades and later 20 specimens of each clades were morphologically identified
cvb701tetr002	658[0n]	KX419891	0	n.a.	0	n.a.	0	07-Apr-2014	Tetradonia laticeps	adult	Eciton dulcium	colony ID ED9	collected during host colony emigration	vouchered: private collection	Personal Collection of Christoph Von Beeren	specimen were first sort into genetic clades and later 20 specimens of each clades were morphologically identified
cvb701tetr004	658[0n]	KX419890	0	n.a.	0	n.a.	0	07-Apr-2014	Tetradonia laticeps	adult	Eciton dulcium	colony ID ED9	collected during host colony emigration	vouchered: private collection	Personal Collection of Christoph Von Beeren	specimen were first sort into genetic clades and later 20 specimens of each clades were morphologically identified
cvb715tetr001	658[0n]	KX419889	0	n.a.	0	n.a.	0	13-Apr-2014	Tetradonia laticeps	adult	Eciton dulcium	colony ID ED10	collected during host colony emigration	vouchered: private collection	Personal Collection of Christoph Von Beeren	specimen were first sort into genetic clades and later 20 specimens of each clades were morphologically identified
cvb715tetr002	658[0n]	KX419888	0	n.a.	0	n.a.	0	13-Apr-2014	Tetradonia laticeps	adult	Eciton dulcium	colony ID ED10	collected during host colony emigration	vouchered: private collection	Personal Collection of Christoph Von Beeren	specimen were first sort into genetic clades and later 20 specimens of each clades were morphologically identified
cvb715tetr003	658[0n]	KX419887	0	n.a.	0	n.a.	0	13-Apr-2014	Tetradonia laticeps	adult	Eciton dulcium	colony ID ED10	collected during host colony emigration	vouchered: private collection	Personal Collection of Christoph Von Beeren	specimen were first sort into genetic clades and later 20 specimens of each clades were morphologically identified
cvb701tetr006	658[0n]	KX419826	0	n.a.	0	n.a.	0	07-Apr-2014	Tetradonia laticeps	adult	Eciton dulcium	colony ID ED9	collected during host colony emigration	vouchered: private collection	Personal Collection of Christoph Von Beeren	specimen were first sort into genetic clades and later 20 specimens of each clades were morphologically identified
cvb271tetr001	658[0n]	KX419924	496[9n]	KX420276	429[3n]	KX420180	0	12-Mar-2013	Tetradonia laticeps	adult	Eciton vagans	colony ID EV5	collected during host colony emigration	vouchered: private collection	Personal Collection of Christoph Von Beeren	specimen were first sort into genetic clades and later 20 specimens of each clades were morphologically identified
cvb715tetr004	658[0n]	KX419886	0	n.a.	0	n.a.	0	13-Apr-2014	Tetradonia laticeps	adult	Eciton dulcium	colony ID ED10	collected during host colony emigration	vouchered: private collection	Personal Collection of Christoph Von Beeren	specimen were first sort into genetic clades and later 20 specimens of each clades were morphologically identified
cvb048tetr005	658[0n]	KX419827	0	n.a.	0	n.a.	0	14-Feb-2013	Tetradonia laticeps	adult	Eciton hamatum	colony ID EH3	collected during host colony emigration	vouchered: private collection	Personal Collection of Christoph Von Beeren	specimen were first sort into genetic clades and later 20 specimens of each clades were morphologically identified
cvb048tetr004	658[0n]	KX419828	0	n.a.	0	n.a.	0	14-Feb-2013	Tetradonia laticeps	adult	Eciton hamatum	colony ID EH3	collected during host colony emigration	vouchered: private collection	Personal Collection of Christoph Von Beeren	specimen were first sort into genetic clades and later 20 specimens of each clades were morphologically identified
cvb048tetr003	658[0n]	KX419829	0	n.a.	0	n.a.	0	14-Feb-2013	Tetradonia laticeps	adult	Eciton hamatum	colony ID EH3	collected during host colony emigration	vouchered: private collection	Personal Collection of Christoph Von Beeren	specimen were first sort into genetic clades and later 20 specimens of each clades were morphologically identified
cvb048tetr002	658[0n]	KX419830	0	n.a.	0	n.a.	0	14-Feb-2013	Tetradonia laticeps	adult	Eciton hamatum	colony ID EH3	collected during host colony emigration	vouchered: private collection	Personal Collection of Christoph Von Beeren	specimen were first sort into genetic clades and later 20 specimens of each clades were morphologically identified
cvb715tetr005	658[0n]	KX419885	0	n.a.	0	n.a.	0	13-Apr-2014	Tetradonia laticeps	adult	Eciton dulcium	colony ID ED10	collected during host colony emigration	vouchered: private collection	Personal Collection of Christoph Von Beeren	specimen were first sort into genetic clades and later 20 specimens of each clades were morphologically identified
cvb011tetr001	658[0n]	KX419831	0	n.a.	0	n.a.	0	08-Feb-2013	Tetradonia laticeps	adult	Eciton hamatum	colony ID EH3	collected during host colony emigration	vouchered: private collection	Personal Collection of Christoph Von Beeren	specimen were first sort into genetic clades and later 20 specimens of each clades were morphologically identified
cvb108tetr001	658[0n]	KX419832	0	n.a.	0	n.a.	0	21-Feb-2013	Tetradonia laticeps	adult	Eciton dulcium	colony ID ED1	collected in host refuse deposit	vouchered: private collection	Personal Collection of Christoph Von Beeren	specimen were first sort into genetic clades and later 20 specimens of each clades were morphologically identified
cvb721tetr005	658[0n]	KX419833	0	n.a.	0	n.a.	0	15-Apr-2014	Tetradonia laticeps	adult	Eciton mexicanum	colony ID EM10	collected during host colony emigration	vouchered: private collection	Personal Collection of Christoph Von Beeren	specimen were first sort into genetic clades and later 20 specimens of each clades were morphologically identified
cvb718tetr001	658[0n]	KX419884	0	n.a.	0	n.a.	0	14-Apr-2014	Tetradonia laticeps	adult	Eciton dulcium	colony ID ED11	collected during host colony emigration	vouchered: private collection	Personal Collection of Christoph Von Beeren	specimen were first sort into genetic clades and later 20 specimens of each clades were morphologically identified
cvb718tetr002	658[0n]	KX419883	0	n.a.	0	n.a.	0	14-Apr-2014	Tetradonia laticeps	adult	Eciton dulcium	colony ID ED11	collected during host colony emigration	vouchered: private collection	Personal Collection of Christoph Von Beeren	specimen were first sort into genetic clades and later 20 specimens of each clades were morphologically identified
cvb718tetr003	658[0n]	KX419882	0	n.a.	0	n.a.	0	14-Apr-2014	Tetradonia laticeps	adult	Eciton dulcium	colony ID ED11	collected during host colony emigration	vouchered: private collection	Personal Collection of Christoph Von Beeren	specimen were first sort into genetic clades and later 20 specimens of each clades were morphologically identified
cvb594tetr004	658[0n]	KX419834	0	n.a.	0	n.a.	0	20-Mar-2014	Tetradonia laticeps	adult	Eciton mexicanum	colony ID EM6	collected during host colony emigration	vouchered: private collection	Personal Collection of Christoph Von Beeren	specimen were first sort into genetic clades and later 20 specimens of each clades were morphologically identified
cvb594tetr003	658[0n]	KX419835	0	n.a.	0	n.a.	0	20-Mar-2014	Tetradonia laticeps	adult	Eciton mexicanum	colony ID EM6	collected during host colony emigration	vouchered: private collection	Personal Collection of Christoph Von Beeren	specimen were first sort into genetic clades and later 20 specimens of each clades were morphologically identified
cvb594tetr002	658[0n]	KX419836	0	n.a.	0	n.a.	0	20-Mar-2014	Tetradonia laticeps	adult	Eciton mexicanum	colony ID EM6	collected during host colony emigration	museum vouchered	Kyushu University, Museum	specimen were first sort into genetic clades and later 20 specimens of each clades were morphologically identified
cvb594tetr001	658[0n]	KX419837	0	n.a.	0	n.a.	0	20-Mar-2014	Tetradonia laticeps	adult	Eciton mexicanum	colony ID EM6	collected during host colony emigration	vouchered: private collection	Personal Collection of Christoph Von Beeren	specimen were first sort into genetic clades and later 20 specimens of each clades were morphologically identified
cvb593tetr001	658[0n]	KX419838	0	n.a.	0	n.a.	0	20-Mar-2014	Tetradonia laticeps	adult	Eciton mexicanum	colony ID EM6	collected during host colony emigration	vouchered: private collection	Personal Collection of Christoph Von Beeren	specimen were first sort into genetic clades and later 20 specimens of each clades were morphologically identified
cvb734tetr005	658[0n]	KX419839	0	n.a.	0	n.a.	0	22-Apr-2014	Tetradonia laticeps	adult	Eciton mexicanum	colony ID EM13	collected during host colony emigration	museum vouchered	Kyushu University, Museum	specimen were first sort into genetic clades and later 20 specimens of each clades were morphologically identified
cvb734tetr004	658[0n]	KX419840	0	n.a.	0	n.a.	0	22-Apr-2014	Tetradonia laticeps	adult	Eciton mexicanum	colony ID EM13	collected during host colony emigration	vouchered: private collection	Personal Collection of Christoph Von Beeren	specimen were first sort into genetic clades and later 20 specimens of each clades were morphologically identified
cvb734tetr003	658[0n]	KX419841	0	n.a.	0	n.a.	0	22-Apr-2014	Tetradonia laticeps	adult	Eciton mexicanum	colony ID EM13	collected during host colony emigration	vouchered: private collection	Personal Collection of Christoph Von Beeren	specimen were first sort into genetic clades and later 20 specimens of each clades were morphologically identified
cvb734tetr002	658[0n]	KX419842	0	n.a.	0	n.a.	0	22-Apr-2014	Tetradonia laticeps	adult	Eciton mexicanum	colony ID EM13	collected during host colony emigration	vouchered: private collection	Personal Collection of Christoph Von Beeren	specimen were first sort into genetic clades and later 20 specimens of each clades were morphologically identified
cvb734tetr001	658[0n]	KX419843	0	n.a.	0	n.a.	0	22-Apr-2014	Tetradonia laticeps	adult	Eciton mexicanum	colony ID EM13	collected during host colony emigration	vouchered: private collection	Personal Collection of Christoph Von Beeren	specimen were first sort into genetic clades and later 20 specimens of each clades were morphologically identified
cvb733tetr001	658[0n]	KX419844	0	n.a.	0	n.a.	0	21-Apr-2014	Tetradonia laticeps	adult	Eciton mexicanum	colony ID EM12	collected during host colony emigration	vouchered: private collection	Personal Collection of Christoph Von Beeren	specimen were first sort into genetic clades and later 20 specimens of each clades were morphologically identified
cvb725tetr005	658[0n]	KX419845	0	n.a.	0	n.a.	0	17-Apr-2014	Tetradonia laticeps	adult	Eciton mexicanum	colony ID EM11	collected during host colony raid	vouchered: private collection	Personal Collection of Christoph Von Beeren	specimen were first sort into genetic clades and later 20 specimens of each clades were morphologically identified
cvb725tetr004	658[0n]	KX419846	0	n.a.	0	n.a.	0	17-Apr-2014	Tetradonia laticeps	adult	Eciton mexicanum	colony ID EM11	collected during host colony raid	vouchered: private collection	Personal Collection of Christoph Von Beeren	specimen were first sort into genetic clades and later 20 specimens of each clades were morphologically identified
cvb725tetr003	658[0n]	KX419847	0	n.a.	0	n.a.	0	17-Apr-2014	Tetradonia laticeps	adult	Eciton mexicanum	colony ID EM11	collected during host colony raid	vouchered: private collection	Personal Collection of Christoph Von Beeren	specimen were first sort into genetic clades and later 20 specimens of each clades were morphologically identified
cvb725tetr002	658[0n]	KX419848	0	n.a.	0	n.a.	0	17-Apr-2014	Tetradonia laticeps	adult	Eciton mexicanum	colony ID EM11	collected during host colony raid	vouchered: private collection	Personal Collection of Christoph Von Beeren	specimen were first sort into genetic clades and later 20 specimens of each clades were morphologically identified
cvb725tetr001	658[0n]	KX419849	0	n.a.	0	n.a.	0	17-Apr-2014	Tetradonia laticeps	adult	Eciton mexicanum	colony ID EM11	collected during host colony raid	vouchered: private collection	Personal Collection of Christoph Von Beeren	specimen were first sort into genetic clades and later 20 specimens of each clades were morphologically identified
cvb750tetr005	658[0n]	KX419850	0	n.a.	0	n.a.	0	27-Apr-2014	Tetradonia laticeps	adult	Eciton vagans	colony ID EV9	collected during host colony emigration	vouchered: private collection	Personal Collection of Christoph Von Beeren	specimen were first sort into genetic clades and later 20 specimens of each clades were morphologically identified
cvb750tetr004	658[0n]	KX419851	0	n.a.	0	n.a.	0	27-Apr-2014	Tetradonia laticeps	adult	Eciton vagans	colony ID EV9	collected during host colony emigration	vouchered: private collection	Personal Collection of Christoph Von Beeren	specimen were first sort into genetic clades and later 20 specimens of each clades were morphologically identified
cvb750tetr003	658[0n]	KX419852	0	n.a.	0	n.a.	0	27-Apr-2014	Tetradonia laticeps	adult	Eciton vagans	colony ID EV9	collected during host colony emigration	vouchered: private collection	Personal Collection of Christoph Von Beeren	specimen were first sort into genetic clades and later 20 specimens of each clades were morphologically identified
cvb750tetr002	658[0n]	KX419853	0	n.a.	0	n.a.	0	27-Apr-2014	Tetradonia laticeps	adult	Eciton vagans	colony ID EV9	collected during host colony emigration	vouchered: private collection	Personal Collection of Christoph Von Beeren	specimen were first sort into genetic clades and later 20 specimens of each clades were morphologically identified
cvb747tetr004	658[0n]	KX419855	0	n.a.	0	n.a.	0	24-Apr-2014	Tetradonia laticeps	adult	Eciton vagans	colony ID EV8	collected during host colony emigration	vouchered: private collection	Personal Collection of Christoph Von Beeren	specimen were first sort into genetic clades and later 20 specimens of each clades were morphologically identified
cvb750tetr001	658[0n]	KX419854	0	n.a.	0	n.a.	0	27-Apr-2014	Tetradonia laticeps	adult	Eciton vagans	colony ID EV9	collected during host colony emigration	vouchered: private collection	Personal Collection of Christoph Von Beeren	specimen were first sort into genetic clades and later 20 specimens of each clades were morphologically identified
cvb747tetr003	658[0n]	KX419856	0	n.a.	0	n.a.	0	24-Apr-2014	Tetradonia laticeps	adult	Eciton vagans	colony ID EV8	collected during host colony emigration	vouchered: private collection	Personal Collection of Christoph Von Beeren	specimen were first sort into genetic clades and later 20 specimens of each clades were morphologically identified
cvb747tetr002	658[0n]	KX419857	0	n.a.	0	n.a.	0	24-Apr-2014	Tetradonia laticeps	adult	Eciton vagans	colony ID EV8	collected during host colony emigration	vouchered: private collection	Personal Collection of Christoph Von Beeren	specimen were first sort into genetic clades and later 20 specimens of each clades were morphologically identified
cvb747tetr001	658[0n]	KX419858	0	n.a.	0	n.a.	0	24-Apr-2014	Tetradonia laticeps	adult	Eciton vagans	colony ID EV8	collected during host colony emigration	vouchered: private collection	Personal Collection of Christoph Von Beeren	specimen were first sort into genetic clades and later 20 specimens of each clades were morphologically identified
cvb702tetr005	658[0n]	KX419859	0	n.a.	0	n.a.	0	08-Apr-2014	Tetradonia laticeps	adult	Eciton vagans	colony ID EV6	collected during host colony emigration	vouchered: private collection	Personal Collection of Christoph Von Beeren	specimen were first sort into genetic clades and later 20 specimens of each clades were morphologically identified
cvb702tetr004	658[0n]	KX419860	0	n.a.	0	n.a.	0	08-Apr-2014	Tetradonia laticeps	adult	Eciton vagans	colony ID EV6	collected during host colony emigration	vouchered: private collection	Personal Collection of Christoph Von Beeren	specimen were first sort into genetic clades and later 20 specimens of each clades were morphologically identified
cvb702tetr003	658[0n]	KX419861	0	n.a.	0	n.a.	0	08-Apr-2014	Tetradonia laticeps	adult	Eciton vagans	colony ID EV6	collected during host colony emigration	vouchered: private collection	Personal Collection of Christoph Von Beeren	specimen were first sort into genetic clades and later 20 specimens of each clades were morphologically identified
cvb702tetr002	658[0n]	KX419862	0	n.a.	0	n.a.	0	08-Apr-2014	Tetradonia laticeps	adult	Eciton vagans	colony ID EV6	collected during host colony emigration	vouchered: private collection	Personal Collection of Christoph Von Beeren	specimen were first sort into genetic clades and later 20 specimens of each clades were morphologically identified
cvb702tetr001	658[0n]	KX419863	0	n.a.	0	n.a.	0	08-Apr-2014	Tetradonia laticeps	adult	Eciton vagans	colony ID EV6	collected during host colony emigration	vouchered: private collection	Personal Collection of Christoph Von Beeren	specimen were first sort into genetic clades and later 20 specimens of each clades were morphologically identified
cvb721sta001	658[0n]	KX419864	0	n.a.	0	n.a.	0	15-Apr-2014	Tetradonia laticeps	adult	Eciton mexicanum	colony ID EM10	collected during host colony emigration	vouchered: private collection	Personal Collection of Christoph Von Beeren	specimen were first sort into genetic clades and later 20 specimens of each clades were morphologically identified
cvb721tetr004	658[0n]	KX419865	0	n.a.	0	n.a.	0	15-Apr-2014	Tetradonia laticeps	adult	Eciton mexicanum	colony ID EM10	collected during host colony emigration	vouchered: private collection	Personal Collection of Christoph Von Beeren	specimen were first sort into genetic clades and later 20 specimens of each clades were morphologically identified
cvb721tetr003	658[0n]	KX419866	0	n.a.	0	n.a.	0	15-Apr-2014	Tetradonia laticeps	adult	Eciton mexicanum	colony ID EM10	collected during host colony emigration	vouchered: private collection	Personal Collection of Christoph Von Beeren	specimen were first sort into genetic clades and later 20 specimens of each clades were morphologically identified
cvb721tetr002	658[0n]	KX419867	0	n.a.	0	n.a.	0	15-Apr-2014	Tetradonia laticeps	adult	Eciton mexicanum	colony ID EM10	collected during host colony emigration	vouchered: private collection	Personal Collection of Christoph Von Beeren	specimen were first sort into genetic clades and later 20 specimens of each clades were morphologically identified
cvb721tetr001	658[0n]	KX419868	0	n.a.	0	n.a.	0	15-Apr-2014	Tetradonia laticeps	adult	Eciton mexicanum	colony ID EM10	collected during host colony emigration	vouchered: private collection	Personal Collection of Christoph Von Beeren	specimen were first sort into genetic clades and later 20 specimens of each clades were morphologically identified
cvb692tetr005	658[0n]	KX419869	0	n.a.	0	n.a.	0	04-May-2014	Tetradonia laticeps	adult	Eciton mexicanum	colony ID EM9	collected during host colony emigration	vouchered: private collection	Personal Collection of Christoph Von Beeren	specimen were first sort into genetic clades and later 20 specimens of each clades were morphologically identified
cvb692tetr004	658[0n]	KX419870	0	n.a.	0	n.a.	0	04-May-2014	Tetradonia laticeps	adult	Eciton mexicanum	colony ID EM9	collected during host colony emigration	vouchered: private collection	Personal Collection of Christoph Von Beeren	specimen were first sort into genetic clades and later 20 specimens of each clades were morphologically identified
cvb687tetr009	658[0n]	KX419952	0	n.a.	0	n.a.	0	04-Apr-2014	Tetradonia lizonae	adult	Eciton hamatum	colony ID EH14	collected during host colony emigration	vouchered: private collection	Personal Collection of Christoph Von Beeren	specimen were first sort into genetic clades and later 20 specimens of each clades were morphologically identified
cvb038tetr014	658[0n]	KX419971	0	n.a.	0	n.a.	0	12-Feb-2013	Tetradonia lizonae	adult	Eciton burchellii	colony ID EB1	collected during host colony emigration	museum vouchered:paratype	Field Museum of Natural History, Chicago	specimen were first sort into genetic clades and later 20 specimens of each clades were morphologically identified
cvb451tetr010	658[0n]	KX419981	0	n.a.	0	n.a.	0	29-Mar-2013	Tetradonia lizonae	adult	Eciton hamatum	colony ID EH8	collected during host colony emigration	museum vouchered:paratype	Kyushu University, Museum	specimen were first sort into genetic clades and later 20 specimens of each clades were morphologically identified
cvb451tetr007	658[0n]	KX419977	0	n.a.	0	n.a.	5	29-Mar-2013	Tetradonia lizonae	adult	Eciton hamatum	colony ID EH8	collected during host colony emigration	museum vouchered:holotype	Kyushu University, Museum	specimen were first sort into genetic clades and later 20 specimens of each clades were morphologically identified
cvb451tetr006	658[0n]	KX419972	0	n.a.	0	n.a.	0	29-Mar-2013	Tetradonia lizonae	adult	Eciton hamatum	colony ID EH8	collected during host colony emigration	museum vouchered:paratype	Field Museum of Natural History, Chicago	specimen were first sort into genetic clades and later 20 specimens of each clades were morphologically identified
cvb433tetr009	658[0n]	KX420003	0	n.a.	0	n.a.	0	25-Mar-2013	Tetradonia lizonae	adult	Eciton hamatum	colony ID EH7	collected during host colony emigration	museum vouchered:paratype	Kyushu University, Museum	specimen were first sort into genetic clades and later 20 specimens of each clades were morphologically identified
cvb316tetr010	658[0n]	KX419938	0	n.a.	0	n.a.	0	17-Mar-2013	Tetradonia lizonae	adult	Eciton hamatum	colony ID EH4	collected during host colony emigration	museum vouchered:paratype	Kyushu University, Museum	specimen were first sort into genetic clades and later 20 specimens of each clades were morphologically identified
cvb316tetr009	658[0n]	KX419939	0	n.a.	0	n.a.	0	17-Mar-2013	Tetradonia lizonae	adult	Eciton hamatum	colony ID EH4	collected during host colony emigration	museum vouchered:paratype	Kyushu University, Museum	specimen were first sort into genetic clades and later 20 specimens of each clades were morphologically identified
cvb010tetr011	658[0n]	KX419946	0	n.a.	0	n.a.	0	08-Feb-2013	Tetradonia lizonae	adult	Eciton hamatum	colony ID EH3	collected during host colony emigration	museum vouchered:paratype	Kyushu University, Museum	specimen were first sort into genetic clades and later 20 specimens of each clades were morphologically identified
cvb010tetr010	658[0n]	KX419947	0	n.a.	0	n.a.	0	08-Feb-2013	Tetradonia lizonae	adult	Eciton hamatum	colony ID EH3	collected during host colony emigration	museum vouchered:paratype	Kyushu University, Museum	specimen were first sort into genetic clades and later 20 specimens of each clades were morphologically identified
cvb010tetr009	658[0n]	KX419948	0	n.a.	0	n.a.	0	08-Feb-2013	Tetradonia lizonae	adult	Eciton hamatum	colony ID EH3	collected during host colony emigration	museum vouchered:paratype	Kyushu University, Museum	specimen were first sort into genetic clades and later 20 specimens of each clades were morphologically identified
cvb010tetr008	658[0n]	KX419949	0	n.a.	0	n.a.	0	08-Feb-2013	Tetradonia lizonae	adult	Eciton hamatum	colony ID EH3	collected during host colony emigration	vouchered: private collection	Personal Collection of Christoph Von Beeren	specimen were first sort into genetic clades and later 20 specimens of each clades were morphologically identified
cvb010tetr007	658[0n]	KX419950	0	n.a.	0	n.a.	0	08-Feb-2013	Tetradonia lizonae	adult	Eciton hamatum	colony ID EH3	collected during host colony emigration	vouchered: private collection	Personal Collection of Christoph Von Beeren	specimen were first sort into genetic clades and later 20 specimens of each clades were morphologically identified
cvb687tetr010	658[0n]	KX419951	0	n.a.	0	n.a.	0	04-Apr-2014	Tetradonia lizonae	adult	Eciton hamatum	colony ID EH14	collected during host colony emigration	vouchered: private collection	Personal Collection of Christoph Von Beeren	specimen were first sort into genetic clades and later 20 specimens of each clades were morphologically identified
cvb687tetr008	658[0n]	KX419953	0	n.a.	0	n.a.	0	04-Apr-2014	Tetradonia lizonae	adult	Eciton hamatum	colony ID EH14	collected during host colony emigration	vouchered: private collection	Personal Collection of Christoph Von Beeren	specimen were first sort into genetic clades and later 20 specimens of each clades were morphologically identified
cvb687tetr007	658[0n]	KX419954	0	n.a.	0	n.a.	0	04-Apr-2014	Tetradonia lizonae	adult	Eciton hamatum	colony ID EH14	collected during host colony emigration	vouchered: private collection	Personal Collection of Christoph Von Beeren	specimen were first sort into genetic clades and later 20 specimens of each clades were morphologically identified
cvb687tetr006	658[0n]	KX419955	0	n.a.	0	n.a.	0	04-Apr-2014	Tetradonia lizonae	adult	Eciton hamatum	colony ID EH14	collected during host colony emigration	vouchered: private collection	Personal Collection of Christoph Von Beeren	specimen were first sort into genetic clades and later 20 specimens of each clades were morphologically identified
cvb676tetr008	658[0n]	KX419958	0	n.a.	0	n.a.	0	31-Mar-2014	Tetradonia lizonae	adult	Eciton hamatum	colony ID EH13	collected during host colony emigration	vouchered: private collection	Personal Collection of Christoph Von Beeren	specimen were first sort into genetic clades and later 20 specimens of each clades were morphologically identified
cvb676tetr007	658[0n]	KX419959	0	n.a.	0	n.a.	0	31-Mar-2014	Tetradonia lizonae	adult	Eciton hamatum	colony ID EH13	collected during host colony emigration	vouchered: private collection	Personal Collection of Christoph Von Beeren	specimen were first sort into genetic clades and later 20 specimens of each clades were morphologically identified
cvb606tetr010	658[0n]	KX419961	0	n.a.	0	n.a.	0	23-Mar-2014	Tetradonia lizonae	adult	Eciton hamatum	colony ID EH12	collected during host colony emigration	vouchered: private collection	Personal Collection of Christoph Von Beeren	specimen were first sort into genetic clades and later 20 specimens of each clades were morphologically identified
cvb606tetr009	658[0n]	KX419962	0	n.a.	0	n.a.	0	23-Mar-2014	Tetradonia lizonae	adult	Eciton hamatum	colony ID EH12	collected during host colony emigration	vouchered: private collection	Personal Collection of Christoph Von Beeren	specimen were first sort into genetic clades and later 20 specimens of each clades were morphologically identified
cvb606tetr008	658[0n]	KX419963	0	n.a.	0	n.a.	0	23-Mar-2014	Tetradonia lizonae	adult	Eciton hamatum	colony ID EH12	collected during host colony emigration	vouchered: private collection	Personal Collection of Christoph Von Beeren	specimen were first sort into genetic clades and later 20 specimens of each clades were morphologically identified
cvb606tetr007	658[0n]	KX419964	0	n.a.	0	n.a.	0	23-Mar-2014	Tetradonia lizonae	adult	Eciton hamatum	colony ID EH12	collected during host colony emigration	museum vouchered:paratype	Kyushu University, Museum	specimen were first sort into genetic clades and later 20 specimens of each clades were morphologically identified
cvb606tetr006	658[0n]	KX419965	0	n.a.	0	n.a.	0	23-Mar-2014	Tetradonia lizonae	adult	Eciton hamatum	colony ID EH12	collected during host colony emigration	vouchered: private collection	Personal Collection of Christoph Von Beeren	specimen were first sort into genetic clades and later 20 specimens of each clades were morphologically identified
cvb541tetr010	658[0n]	KX419967	0	n.a.	0	n.a.	0	07-Apr-2013	Tetradonia lizonae	adult	Eciton hamatum	colony ID EH10	collected during host colony emigration	museum vouchered:paratype	Kyushu University, Museum	specimen were first sort into genetic clades and later 20 specimens of each clades were morphologically identified
cvb499tetr001	658[0n]	KX419992	0	n.a.	0	n.a.	0	03-Apr-2013	Tetradonia lizonae	adult	Eciton hamatum	colony ID EH9	collected during host colony emigration	vouchered: private collection	Personal Collection of Christoph Von Beeren	specimen were first sort into genetic clades and later 20 specimens of each clades were morphologically identified
cvb433tetr006	658[0n]	KX419973	0	n.a.	0	n.a.	0	25-Mar-2013	Tetradonia lizonae	adult	Eciton hamatum	colony ID EH7	collected during host colony emigration	vouchered: private collection	Personal Collection of Christoph Von Beeren	specimen were first sort into genetic clades and later 20 specimens of each clades were morphologically identified
cvb689tetr004	658[0n]	KX419975	517[2n]	KX420295	432[0n]	KX420197	0	04-Apr-2014	Tetradonia lizonae	adult	Eciton hamatum	colony ID EH14	collected during host colony emigration	vouchered: private collection	Personal Collection of Christoph Von Beeren	specimen were first sort into genetic clades and later 20 specimens of each clades were morphologically identified
cvb689tetr003	658[0n]	KX419987	0	n.a.	0	n.a.	0	04-Apr-2014	Tetradonia lizonae	adult	Eciton hamatum	colony ID EH14	collected during host colony emigration	vouchered: private collection	Personal Collection of Christoph Von Beeren	specimen were first sort into genetic clades and later 20 specimens of each clades were morphologically identified
cvb676tetr005	658[0n]	KX419996	0	n.a.	0	n.a.	0	31-Mar-2014	Tetradonia lizonae	adult	Eciton hamatum	colony ID EH13	collected during host colony emigration	vouchered: private collection	Personal Collection of Christoph Von Beeren	specimen were first sort into genetic clades and later 20 specimens of each clades were morphologically identified
cvb676tetr003	658[0n]	KX419998	0	n.a.	0	n.a.	0	31-Mar-2014	Tetradonia lizonae	adult	Eciton hamatum	colony ID EH13	collected during host colony emigration	vouchered: private collection	Personal Collection of Christoph Von Beeren	specimen were first sort into genetic clades and later 20 specimens of each clades were morphologically identified
cvb676tetr002	658[0n]	KX420001	0	n.a.	0	n.a.	0	31-Mar-2014	Tetradonia lizonae	adult	Eciton hamatum	colony ID EH13	collected during host colony emigration	vouchered: private collection	Personal Collection of Christoph Von Beeren	specimen were first sort into genetic clades and later 20 specimens of each clades were morphologically identified
cvb606tetr004	658[0n]	KX419936	0	n.a.	0	n.a.	0	23-Mar-2014	Tetradonia lizonae	adult	Eciton hamatum	colony ID EH12	collected during host colony emigration	museum vouchered:paratype	Connecticut State Museum of Natural History	specimen were first sort into genetic clades and later 20 specimens of each clades were morphologically identified
cvb606tetr002	658[0n]	KX419940	0	n.a.	0	n.a.	0	23-Mar-2014	Tetradonia lizonae	adult	Eciton hamatum	colony ID EH12	collected during host colony emigration	museum vouchered:paratype	Kyushu University, Museum	specimen were first sort into genetic clades and later 20 specimens of each clades were morphologically identified
cvb606tetr001	658[0n]	KX419941	551[3n]	KX420287	432[0n]	KX420190	0	23-Mar-2014	Tetradonia lizonae	adult	Eciton hamatum	colony ID EH12	collected during host colony emigration	vouchered: private collection	Personal Collection of Christoph Von Beeren	specimen were first sort into genetic clades and later 20 specimens of each clades were morphologically identified
cvb603tetr005	658[0n]	KX419942	539[1n]	KX420288	389[0n]	KX420191	0	23-Mar-2014	Tetradonia lizonae	adult	Eciton hamatum	colony ID EH11	collected during host colony raid	vouchered: private collection	Personal Collection of Christoph Von Beeren	specimen were first sort into genetic clades and later 20 specimens of each clades were morphologically identified
cvb603tetr004	658[0n]	KX419943	0	n.a.	0	n.a.	0	23-Mar-2014	Tetradonia lizonae	adult	Eciton hamatum	colony ID EH11	collected during host colony raid	vouchered: private collection	Personal Collection of Christoph Von Beeren	specimen were first sort into genetic clades and later 20 specimens of each clades were morphologically identified
cvb603tetr003	658[0n]	KX419956	0	n.a.	0	n.a.	0	23-Mar-2014	Tetradonia lizonae	adult	Eciton hamatum	colony ID EH11	collected during host colony raid	museum vouchered:paratype	Kyushu University, Museum	specimen were first sort into genetic clades and later 20 specimens of each clades were morphologically identified
cvb603tetr002	658[0n]	KX419960	0	n.a.	0	n.a.	0	23-Mar-2014	Tetradonia lizonae	adult	Eciton hamatum	colony ID EH11	collected during host colony raid	vouchered: private collection	Personal Collection of Christoph Von Beeren	specimen were first sort into genetic clades and later 20 specimens of each clades were morphologically identified
cvb603tetr001	658[0n]	KX419966	0	n.a.	0	n.a.	0	23-Mar-2014	Tetradonia lizonae	adult	Eciton hamatum	colony ID EH11	collected during host colony raid	vouchered: private collection	Personal Collection of Christoph Von Beeren	specimen were first sort into genetic clades and later 20 specimens of each clades were morphologically identified
cvb541tetr006	658[0n]	KX419976	505[0n]	KX420296	430[2n]	KX420198	0	07-Apr-2013	Tetradonia lizonae	adult	Eciton hamatum	colony ID EH10	collected during host colony emigration	vouchered: private collection	Personal Collection of Christoph Von Beeren	specimen were first sort into genetic clades and later 20 specimens of each clades were morphologically identified
cvb541tetr005	658[0n]	KX419978	0	n.a.	0	n.a.	0	07-Apr-2013	Tetradonia lizonae	adult	Eciton hamatum	colony ID EH10	collected during host colony emigration	vouchered: private collection	Personal Collection of Christoph Von Beeren	specimen were first sort into genetic clades and later 20 specimens of each clades were morphologically identified
cvb541tetr004	658[0n]	KX419979	504[1n]	KX420297	431[1n]	KX420199	0	07-Apr-2013	Tetradonia lizonae	adult	Eciton hamatum	colony ID EH10	collected during host colony emigration	vouchered: private collection	Personal Collection of Christoph Von Beeren	specimen were first sort into genetic clades and later 20 specimens of each clades were morphologically identified
cvb488tetr005	658[0n]	KX419980	0	n.a.	0	n.a.	0	02-Apr-2013	Tetradonia lizonae	adult	Eciton hamatum	colony ID EH9	collected during host colony emigration	vouchered: private collection	Personal Collection of Christoph Von Beeren	specimen were first sort into genetic clades and later 20 specimens of each clades were morphologically identified
cvb488tetr004	658[0n]	KX419982	502[3n]	KX420298	431[1n]	KX420200	0	02-Apr-2013	Tetradonia lizonae	adult	Eciton hamatum	colony ID EH9	collected during host colony emigration	vouchered: private collection	Personal Collection of Christoph Von Beeren	specimen were first sort into genetic clades and later 20 specimens of each clades were morphologically identified
cvb488tetr003	658[0n]	KX419983	503[2n]	KX420299	431[1n]	KX420201	0	02-Apr-2013	Tetradonia lizonae	adult	Eciton hamatum	colony ID EH9	collected during host colony emigration	vouchered: private collection	Personal Collection of Christoph Von Beeren	specimen were first sort into genetic clades and later 20 specimens of each clades were morphologically identified
cvb488tetr002	658[0n]	KX419984	502[3n]	KX420300	432[0n]	KX420202	0	02-Apr-2013	Tetradonia lizonae	adult	Eciton hamatum	colony ID EH9	collected during host colony emigration	vouchered: private collection	Personal Collection of Christoph Von Beeren	specimen were first sort into genetic clades and later 20 specimens of each clades were morphologically identified
cvb488tetr001	658[0n]	KX419985	0	n.a.	0	n.a.	0	02-Apr-2013	Tetradonia lizonae	adult	Eciton hamatum	colony ID EH9	collected during host colony emigration	museum vouchered:paratype	Kyushu University, Museum	specimen were first sort into genetic clades and later 20 specimens of each clades were morphologically identified
cvb451tetr005	658[0n]	KX419986	505[0n]	KX420301	431[1n]	KX420203	0	29-Mar-2013	Tetradonia lizonae	adult	Eciton hamatum	colony ID EH8	collected during host colony emigration	vouchered: private collection	Personal Collection of Christoph Von Beeren	specimen were first sort into genetic clades and later 20 specimens of each clades were morphologically identified
cvb433tetr005	658[0n]	KX419988	502[3n]	KX420302	432[0n]	KX420204	0	25-Mar-2013	Tetradonia lizonae	adult	Eciton hamatum	colony ID EH7	collected during host colony emigration	vouchered: private collection	Personal Collection of Christoph Von Beeren	specimen were first sort into genetic clades and later 20 specimens of each clades were morphologically identified
cvb433tetr004	658[0n]	KX419989	502[3n]	KX420303	432[0n]	KX420205	0	25-Mar-2013	Tetradonia lizonae	adult	Eciton hamatum	colony ID EH7	collected during host colony emigration	vouchered: private collection	Personal Collection of Christoph Von Beeren	specimen were first sort into genetic clades and later 20 specimens of each clades were morphologically identified
cvb433tetr003	658[0n]	KX419990	0	n.a.	0	n.a.	0	25-Mar-2013	Tetradonia lizonae	adult	Eciton hamatum	colony ID EH7	collected during host colony emigration	vouchered: private collection	Personal Collection of Christoph Von Beeren	specimen were first sort into genetic clades and later 20 specimens of each clades were morphologically identified
cvb433tetr002	658[0n]	KX419991	503[2n]	KX420304	431[1n]	KX420206	4	25-Mar-2013	Tetradonia lizonae	adult	Eciton hamatum	colony ID EH7	collected during host colony emigration	vouchered: private collection	Personal Collection of Christoph Von Beeren	specimen were first sort into genetic clades and later 20 specimens of each clades were morphologically identified
cvb433tetr001	658[0n]	KX419993	505[0n]	KX420305	432[0n]	KX420207	0	25-Mar-2013	Tetradonia lizonae	adult	Eciton hamatum	colony ID EH7	collected during host colony emigration	vouchered: private collection	Personal Collection of Christoph Von Beeren	specimen were first sort into genetic clades and later 20 specimens of each clades were morphologically identified
cvb382tetr005	658[0n]	KX419999	502[3n]	KX420307	431[1n]	KX420210	0	19-Mar-2013	Tetradonia lizonae	adult	Eciton hamatum	colony ID EH5	collected during host colony raid	museum vouchered:paratype	Kyushu University, Museum	specimen were first sort into genetic clades and later 20 specimens of each clades were morphologically identified
cvb382tetr004	658[0n]	KX420000	503[2n]	KX420308	432[0n]	KX420211	0	19-Mar-2013	Tetradonia lizonae	adult	Eciton hamatum	colony ID EH5	collected during host colony raid	vouchered: private collection	Personal Collection of Christoph Von Beeren	specimen were first sort into genetic clades and later 20 specimens of each clades were morphologically identified
cvb010tetr006	658[0n]	KX419944	503[2n]	KX420289	432[0n]	KX420192	0	08-Feb-2013	Tetradonia lizonae	adult	Eciton hamatum	colony ID EH3	collected during host colony emigration	vouchered: private collection	Personal Collection of Christoph Von Beeren	specimen were first sort into genetic clades and later 20 specimens of each clades were morphologically identified
cvb010tetr005	658[0n]	KX419957	524[4n]	KX420291	438[1n]	KX420194	0	08-Feb-2013	Tetradonia lizonae	adult	Eciton hamatum	colony ID EH3	collected during host colony emigration	vouchered: private collection	Personal Collection of Christoph Von Beeren	specimen were first sort into genetic clades and later 20 specimens of each clades were morphologically identified
cvb316tetr005	658[0n]	KX419970	529[0n]	KX420293	431[1n]	KX420196	0	17-Mar-2013	Tetradonia lizonae	adult	Eciton hamatum	colony ID EH4	collected during host colony emigration	vouchered: private collection	Personal Collection of Christoph Von Beeren	specimen were first sort into genetic clades and later 20 specimens of each clades were morphologically identified
cvb316tetr004	658[0n]	KX419945	530[0n]	KX420290	432[0n]	KX420193	0	17-Mar-2013	Tetradonia lizonae	adult	Eciton hamatum	colony ID EH4	collected during host colony emigration	vouchered: private collection	Personal Collection of Christoph Von Beeren	specimen were first sort into genetic clades and later 20 specimens of each clades were morphologically identified
cvb399tetr002	630[0n]	KX420004	0	n.a.	430[2n]	KX420212	0	21-Mar-2013	Tetradonia lizonae	adult	Eciton hamatum	colony ID EH6	collected during host colony emigration	vouchered: private collection	Personal Collection of Christoph Von Beeren	specimen were first sort into genetic clades and later 20 specimens of each clades were morphologically identified
cvb382tetr003	658[0n]	KX419968	505[0n]	KX420292	430[2n]	KX420195	0	19-Mar-2013	Tetradonia lizonae	adult	Eciton hamatum	colony ID EH5	collected during host colony raid	vouchered: private collection	Personal Collection of Christoph Von Beeren	specimen were first sort into genetic clades and later 20 specimens of each clades were morphologically identified
cvb382tetr002	658[0n]	KX419969	0	n.a.	0	n.a.	0	19-Mar-2013	Tetradonia lizonae	adult	Eciton hamatum	colony ID EH5	collected during host colony raid	museum vouchered:paratype	Kyushu University, Museum	specimen were first sort into genetic clades and later 20 specimens of each clades were morphologically identified
cvb010tetr003	658[0n]	KX419994	539[1n]	KX420306	432[0n]	KX420208	12	08-Feb-2013	Tetradonia lizonae	adult	Eciton hamatum	colony ID EH3	collected during host colony emigration	museum vouchered:paratype	Kyushu University, Museum	specimen were first sort into genetic clades and later 20 specimens of each clades were morphologically identified
cvb010tetr002	658[0n]	KX419995	0	n.a.	431[1n]	KX420209	5	08-Feb-2013	Tetradonia lizonae	adult	Eciton hamatum	colony ID EH3	collected during host colony emigration	museum vouchered:paratype	Kyushu University, Museum	specimen were first sort into genetic clades and later 20 specimens of each clades were morphologically identified
cvb451tetr003	658[0n]	KX420002	0	n.a.	0	n.a.	0	29-Mar-2013	Tetradonia lizonae	adult	Eciton hamatum	colony ID EH8	collected during host colony emigration	vouchered: private collection	Personal Collection of Christoph Von Beeren	specimen were first sort into genetic clades and later 20 specimens of each clades were morphologically identified
cvb451tetr002	658[0n]	KX419997	0	n.a.	0	n.a.	0	29-Mar-2013	Tetradonia lizonae	adult	Eciton hamatum	colony ID EH8	collected during host colony emigration	vouchered: private collection	Personal Collection of Christoph Von Beeren	specimen were first sort into genetic clades and later 20 specimens of each clades were morphologically identified
cvb451tetr001	658[0n]	KX419937	0	n.a.	438[0n]	KX420189	0	29-Mar-2013	Tetradonia lizonae	adult	Eciton hamatum	colony ID EH8	collected during host colony emigration	museum vouchered:paratype	Connecticut State Museum of Natural History	specimen were first sort into genetic clades and later 20 specimens of each clades were morphologically identified
cvb316tetr003	658[0n]	KX419974	503[2n]	KX420294	0	n.a.	0	17-Mar-2013	Tetradonia lizonae	adult	Eciton hamatum	colony ID EH4	collected during host colony emigration	museum vouchered:paratype	Kyushu University, Museum	specimen were first sort into genetic clades and later 20 specimens of each clades were morphologically identified
cvb371tetr006	658[0n]	KX420019	0	n.a.	0	n.a.	0	18-Mar-2013	Tetradonia marginalis	adult	Eciton burchellii	colony ID EB4	collected during host colony emigration	vouchered: private collection	Personal Collection of Christoph Von Beeren	specimen were first sort into genetic clades and later 20 specimens of each clades were morphologically identified
cvb249tetr006	658[0n]	KX420017	0	n.a.	0	n.a.	0	10-Mar-2013	Tetradonia marginalis	adult	Eciton burchellii	colony ID EB6	collected during host colony emigration	vouchered: private collection	Personal Collection of Christoph Von Beeren	specimen were first sort into genetic clades and later 20 specimens of each clades were morphologically identified
cvb097tetr005	658[0n]	KX420083	0	n.a.	0	n.a.	0	19-Feb-2013	Tetradonia marginalis	adult	Eciton lucanoides	colony ID EL1	collected during host colony emigration	vouchered: private collection	Personal Collection of Christoph Von Beeren	specimen were first sort into genetic clades and later 20 specimens of each clades were morphologically identified
cvb007tetr001	658[0n]	KX420031	499[6n]	KX420310	431[1n]	KX420214	0	08-Feb-2013	Tetradonia marginalis	adult	Eciton burchellii	colony ID EB2	collected during host colony emigration	vouchered: private collection	Personal Collection of Christoph Von Beeren	specimen were first sort into genetic clades and later 20 specimens of each clades were morphologically identified
cvb451tetr009	658[0n]	KX420011	0	n.a.	0	n.a.	0	29-Mar-2013	Tetradonia marginalis	adult	Eciton hamatum	colony ID EH8	collected during host colony emigration	vouchered: private collection	Personal Collection of Christoph Von Beeren	specimen were first sort into genetic clades and later 20 specimens of each clades were morphologically identified
cvb104tetr009	658[0n]	KX420121	0	n.a.	0	n.a.	0	21-Feb-2013	Tetradonia marginalis	adult	Eciton lucanoides	colony ID EL2	collected during host colony emigration	museum vouchered	Field Museum of Natural History, Chicago	specimen were first sort into genetic clades and later 20 specimens of each clades were morphologically identified
cvb104tetr010	658[0n]	KX420079	0	n.a.	0	n.a.	0	21-Feb-2013	Tetradonia marginalis	adult	Eciton lucanoides	colony ID EL2	collected during host colony emigration	vouchered: private collection	Personal Collection of Christoph Von Beeren	specimen were first sort into genetic clades and later 20 specimens of each clades were morphologically identified
cvb097tetr011	658[0n]	KX420058	0	n.a.	0	n.a.	0	19-Feb-2013	Tetradonia marginalis	adult	Eciton lucanoides	colony ID EL1	collected during host colony emigration	museum vouchered	Kyushu University, Museum	specimen were first sort into genetic clades and later 20 specimens of each clades were morphologically identified
cvb390tetr003	658[0n]	KX420040	0	n.a.	0	n.a.	4	20-Mar-2013	Tetradonia marginalis	adult	Eciton burchellii	colony ID EB9	collected during host colony emigration	vouchered: private collection	Personal Collection of Christoph Von Beeren	specimen were first sort into genetic clades and later 20 specimens of each clades were morphologically identified
cvb390tetr002	658[0n]	KX420041	0	n.a.	0	n.a.	0	20-Mar-2013	Tetradonia marginalis	adult	Eciton burchellii	colony ID EB9	collected during host colony emigration	vouchered: private collection	Personal Collection of Christoph Von Beeren	specimen were first sort into genetic clades and later 20 specimens of each clades were morphologically identified
cvb390tetr001	658[0n]	KX420039	0	n.a.	0	n.a.	24	17-Mar-2013	Tetradonia marginalis	adult	Eciton burchellii	colony ID EB8	collected in host refuse deposit	vouchered: private collection	Personal Collection of Christoph Von Beeren	specimen were first sort into genetic clades and later 20 specimens of each clades were morphologically identified
cvb316tetr002	638[0n]	KX420037	0	n.a.	0	n.a.	0	17-Mar-2013	Tetradonia marginalis	adult	Eciton hamatum	colony ID EH4	collected during host colony emigration	vouchered: private collection	Personal Collection of Christoph Von Beeren	specimen were first sort into genetic clades and later 20 specimens of each clades were morphologically identified
cvb451tetr004	658[0n]	KX420084	0	n.a.	0	n.a.	0	29-Mar-2013	Tetradonia marginalis	adult	Eciton hamatum	colony ID EH8	collected during host colony emigration	vouchered: private collection	Personal Collection of Christoph Von Beeren	specimen were first sort into genetic clades and later 20 specimens of each clades were morphologically identified
cvb316tetr001	658[0n]	KX420038	0	n.a.	0	n.a.	0	17-Mar-2013	Tetradonia marginalis	adult	Eciton hamatum	colony ID EH4	collected during host colony emigration	vouchered: private collection	Personal Collection of Christoph Von Beeren	specimen were first sort into genetic clades and later 20 specimens of each clades were morphologically identified
cvb104tetr011	632[0n]	KX420082	0	n.a.	0	n.a.	0	21-Feb-2013	Tetradonia marginalis	adult	Eciton lucanoides	colony ID EL2	collected during host colony emigration	vouchered: private collection	Personal Collection of Christoph Von Beeren	specimen were first sort into genetic clades and later 20 specimens of each clades were morphologically identified
cvb104tetr012	658[0n]	KX420088	0	n.a.	0	n.a.	0	21-Feb-2013	Tetradonia marginalis	adult	Eciton lucanoides	colony ID EL2	collected during host colony emigration	vouchered: private collection	Personal Collection of Christoph Von Beeren	specimen were first sort into genetic clades and later 20 specimens of each clades were morphologically identified
cvb038tetr013	658[0n]	KX420126	0	n.a.	0	n.a.	0	12-Feb-2013	Tetradonia marginalis	adult	Eciton burchellii	colony ID EB1	collected during host colony emigration	vouchered: private collection	Personal Collection of Christoph Von Beeren	specimen were first sort into genetic clades and later 20 specimens of each clades were morphologically identified
cvb038tetr003	658[0n]	KX420042	504[1n]	KX420313	432[0n]	KX420216	0	12-Feb-2013	Tetradonia marginalis	adult	Eciton burchellii	colony ID EB1	collected during host colony emigration	vouchered: private collection	Personal Collection of Christoph Von Beeren	specimen were first sort into genetic clades and later 20 specimens of each clades were morphologically identified
cvb399tetr007	658[0n]	KX420085	0	n.a.	0	n.a.	0	21-Mar-2013	Tetradonia marginalis	adult	Eciton hamatum	colony ID EH6	collected during host colony emigration	vouchered: private collection	Personal Collection of Christoph Von Beeren	specimen were first sort into genetic clades and later 20 specimens of each clades were morphologically identified
cvb399tetr006	658[0n]	KX420086	503[2n]	KX420327	430[2n]	KX420229	0	21-Mar-2013	Tetradonia marginalis	adult	Eciton hamatum	colony ID EH6	collected during host colony emigration	museum vouchered	Field Museum of Natural History, Chicago	specimen were first sort into genetic clades and later 20 specimens of each clades were morphologically identified
cvb399tetr005	658[0n]	KX420087	0	n.a.	0	n.a.	0	21-Mar-2013	Tetradonia marginalis	adult	Eciton hamatum	colony ID EH6	collected during host colony emigration	vouchered: private collection	Personal Collection of Christoph Von Beeren	specimen were first sort into genetic clades and later 20 specimens of each clades were morphologically identified
cvb250tetr007	658[0n]	KX420016	0	n.a.	0	n.a.	0	10-Mar-2013	Tetradonia marginalis	adult	Eciton burchellii	colony ID EB6	collected during host colony emigration	vouchered: private collection	Personal Collection of Christoph Von Beeren	specimen were first sort into genetic clades and later 20 specimens of each clades were morphologically identified
cvb382tetr006	658[0n]	KX420089	498[3n]	KX420328	431[1n]	KX420230	0	19-Mar-2013	Tetradonia marginalis	adult	Eciton hamatum	colony ID EH5	collected during host colony raid	museum vouchered	Kyushu University, Museum	specimen were first sort into genetic clades and later 20 specimens of each clades were morphologically identified
cvb038tetr002	658[0n]	KX420043	0	n.a.	0	n.a.	0	12-Feb-2013	Tetradonia marginalis	adult	Eciton burchellii	colony ID EB1	collected during host colony emigration	vouchered: private collection	Personal Collection of Christoph Von Beeren	specimen were first sort into genetic clades and later 20 specimens of each clades were morphologically identified
cvb038tetr001	658[0n]	KX420044	0	n.a.	0	n.a.	3	12-Feb-2013	Tetradonia marginalis	adult	Eciton burchellii	colony ID EB1	collected during host colony emigration	vouchered: private collection	Personal Collection of Christoph Von Beeren	specimen were first sort into genetic clades and later 20 specimens of each clades were morphologically identified
cvb015tetr003	658[0n]	KX420045	0	n.a.	0	n.a.	0	09-Feb-2013	Tetradonia marginalis	adult	Eciton burchellii	colony ID EB3	collected during host colony emigration	vouchered: private collection	Personal Collection of Christoph Von Beeren	specimen were first sort into genetic clades and later 20 specimens of each clades were morphologically identified
cvb015tetr002	658[0n]	KX420046	535[3n]	KX420314	431[1n]	KX420217	0	09-Feb-2013	Tetradonia marginalis	adult	Eciton burchellii	colony ID EB3	collected during host colony emigration	vouchered: private collection	Personal Collection of Christoph Von Beeren	specimen were first sort into genetic clades and later 20 specimens of each clades were morphologically identified
cvb371tetr002	658[0n]	KX420020	0	n.a.	0	n.a.	0	18-Mar-2013	Tetradonia marginalis	adult	Eciton burchellii	colony ID EB4	collected during host colony emigration	vouchered: private collection	Personal Collection of Christoph Von Beeren	specimen were first sort into genetic clades and later 20 specimens of each clades were morphologically identified
cvb371tetr003	658[0n]	KX420072	0	n.a.	0	n.a.	0	18-Mar-2013	Tetradonia marginalis	adult	Eciton burchellii	colony ID EB4	collected during host colony emigration	vouchered: private collection	Personal Collection of Christoph Von Beeren	specimen were first sort into genetic clades and later 20 specimens of each clades were morphologically identified
cvb120tetr001	658[0n]	KX420073	0	n.a.	0	n.a.	0	24-Feb-2013	Tetradonia marginalis	adult	Eciton burchellii	colony ID EB4	collected during host colony raid	vouchered: private collection	Personal Collection of Christoph Von Beeren	specimen were first sort into genetic clades and later 20 specimens of each clades were morphologically identified
cvb038tetr006	658[0n]	KX420074	0	n.a.	0	n.a.	0	12-Feb-2013	Tetradonia marginalis	adult	Eciton burchellii	colony ID EB1	collected during host colony emigration	vouchered: private collection	Personal Collection of Christoph Von Beeren	specimen were first sort into genetic clades and later 20 specimens of each clades were morphologically identified
cvb038tetr005	658[0n]	KX420080	0	n.a.	0	n.a.	0	12-Feb-2013	Tetradonia marginalis	adult	Eciton burchellii	colony ID EB1	collected during host colony emigration	vouchered: private collection	Personal Collection of Christoph Von Beeren	specimen were first sort into genetic clades and later 20 specimens of each clades were morphologically identified
cvb038tetr004	658[0n]	KX420081	500[5n]	KX420326	0	n.a.	0	12-Feb-2013	Tetradonia marginalis	adult	Eciton burchellii	colony ID EB1	collected during host colony emigration	vouchered: private collection	Personal Collection of Christoph Von Beeren	specimen were first sort into genetic clades and later 20 specimens of each clades were morphologically identified
cvb007tetr003	658[0n]	KX420022	0	n.a.	0	n.a.	0	08-Feb-2013	Tetradonia marginalis	adult	Eciton burchellii	colony ID EB2	collected during host colony emigration	vouchered: private collection	Personal Collection of Christoph Von Beeren	specimen were first sort into genetic clades and later 20 specimens of each clades were morphologically identified
cvb007tetr002	658[0n]	KX420027	503[2n]	KX420309	431[1n]	KX420213	3	08-Feb-2013	Tetradonia marginalis	adult	Eciton burchellii	colony ID EB2	collected during host colony emigration	museum vouchered	Kyushu University, Museum	specimen were first sort into genetic clades and later 20 specimens of each clades were morphologically identified
cvb371tetr007	658[0n]	KX420018	0	n.a.	0	n.a.	0	18-Mar-2013	Tetradonia marginalis	adult	Eciton burchellii	colony ID EB4	collected during host colony emigration	vouchered: private collection	Personal Collection of Christoph Von Beeren	specimen were first sort into genetic clades and later 20 specimens of each clades were morphologically identified
cvb250tetr008	658[0n]	KX420015	0	n.a.	0	n.a.	0	10-Mar-2013	Tetradonia marginalis	adult	Eciton burchellii	colony ID EB6	collected during host colony emigration	vouchered: private collection	Personal Collection of Christoph Von Beeren	specimen were first sort into genetic clades and later 20 specimens of each clades were morphologically identified
cvb250tetr009	658[0n]	KX420014	0	n.a.	0	n.a.	0	10-Mar-2013	Tetradonia marginalis	adult	Eciton burchellii	colony ID EB6	collected during host colony emigration	vouchered: private collection	Personal Collection of Christoph Von Beeren	specimen were first sort into genetic clades and later 20 specimens of each clades were morphologically identified
cvb423tetr001	658[0n]	KX420013	0	n.a.	0	n.a.	0	23-Mar-2013	Tetradonia marginalis	adult	Eciton burchellii	colony ID EB7	collected during host colony raid	museum vouchered	Kyushu University, Museum	specimen were first sort into genetic clades and later 20 specimens of each clades were morphologically identified
cvb209tetr006	658[0n]	KX420012	0	n.a.	0	n.a.	0	06-Mar-2013	Tetradonia marginalis	adult	Eciton burchellii	colony ID EB7	collected during host colony emigration	vouchered: private collection	Personal Collection of Christoph Von Beeren	specimen were first sort into genetic clades and later 20 specimens of each clades were morphologically identified
cvb308tetr009	658[0n]	KX420009	0	n.a.	0	n.a.	0	16-Mar-2013	Tetradonia marginalis	adult	Eciton burchellii	colony ID EB8	collected during host colony emigration	vouchered: private collection	Personal Collection of Christoph Von Beeren	specimen were first sort into genetic clades and later 20 specimens of each clades were morphologically identified
cvb435tetr001	658[0n]	KX420008	0	n.a.	0	n.a.	0	25-Mar-2013	Tetradonia marginalis	adult	Eciton burchellii	colony ID EB10	collected during host colony raid	vouchered: private collection	Personal Collection of Christoph Von Beeren	specimen were first sort into genetic clades and later 20 specimens of each clades were morphologically identified
cvb533tetr006	658[0n]	KX420114	0	n.a.	0	n.a.	0	06-Apr-2013	Tetradonia marginalis	adult	Eciton burchellii	colony ID EB12	collected during host colony raid	vouchered: private collection	Personal Collection of Christoph Von Beeren	specimen were first sort into genetic clades and later 20 specimens of each clades were morphologically identified
cvb571tetr002	658[0n]	KX420116	0	n.a.	0	n.a.	0	08-Apr-2013	Tetradonia marginalis	adult	Eciton burchellii	colony ID EB11	collected during host colony emigration	vouchered: private collection	Personal Collection of Christoph Von Beeren	specimen were first sort into genetic clades and later 20 specimens of each clades were morphologically identified
cvb422tetr003	658[0n]	KX420117	0	n.a.	0	n.a.	0	24-Mar-2013	Tetradonia marginalis	adult	Eciton burchellii	colony ID EB10	collected during host colony emigration	vouchered: private collection	Personal Collection of Christoph Von Beeren	specimen were first sort into genetic clades and later 20 specimens of each clades were morphologically identified
cvb422tetr002	658[0n]	KX420124	0	n.a.	0	n.a.	0	24-Mar-2013	Tetradonia marginalis	adult	Eciton burchellii	colony ID EB10	collected during host colony emigration	vouchered: private collection	Personal Collection of Christoph Von Beeren	specimen were first sort into genetic clades and later 20 specimens of each clades were morphologically identified
cvb422tetr001	658[0n]	KX420125	0	n.a.	0	n.a.	0	24-Mar-2013	Tetradonia marginalis	adult	Eciton burchellii	colony ID EB10	collected during host colony emigration	vouchered: private collection	Personal Collection of Christoph Von Beeren	specimen were first sort into genetic clades and later 20 specimens of each clades were morphologically identified
cvb435tetr002	658[0n]	KX420007	0	n.a.	0	n.a.	1	25-Mar-2013	Tetradonia marginalis	adult	Eciton burchellii	colony ID EB10	collected during host colony raid	vouchered: private collection	Personal Collection of Christoph Von Beeren	specimen were first sort into genetic clades and later 20 specimens of each clades were morphologically identified
cvb529tetr002	658[0n]	KX420127	503[2n]	KX420332	431[1n]	KX420235	0	06-Apr-2013	Tetradonia marginalis	adult	Eciton burchellii	colony ID EB9	collected during host colony raid	vouchered: private collection	Personal Collection of Christoph Von Beeren	specimen were first sort into genetic clades and later 20 specimens of each clades were morphologically identified
cvb572tetr004	658[0n]	KX420006	0	n.a.	0	n.a.	0	08-Apr-2013	Tetradonia marginalis	adult	Eciton burchellii	colony ID EB11	collected during host colony emigration	vouchered: private collection	Personal Collection of Christoph Von Beeren	specimen were first sort into genetic clades and later 20 specimens of each clades were morphologically identified
cvb311tetr001	658[0n]	KX420129	498[7n]	KX420333	431[1n]	KX420236	0	16-Mar-2013	Tetradonia marginalis	adult	Eciton burchellii	colony ID EB8	collected during host colony emigration	vouchered: private collection	Personal Collection of Christoph Von Beeren	specimen were first sort into genetic clades and later 20 specimens of each clades were morphologically identified
cvb210tetr001	658[0n]	KX420130	0	n.a.	0	n.a.	0	08-Mar-2013	Tetradonia marginalis	adult	Eciton burchellii	colony ID EB7	collected during host colony raid	vouchered: private collection	Personal Collection of Christoph Von Beeren	specimen were first sort into genetic clades and later 20 specimens of each clades were morphologically identified
cvb249tetr005	658[0n]	KX420131	501[4n]	KX420334	430[2n]	KX420237	0	10-Mar-2013	Tetradonia marginalis	adult	Eciton burchellii	colony ID EB6	collected during host colony emigration	vouchered: private collection	Personal Collection of Christoph Von Beeren	specimen were first sort into genetic clades and later 20 specimens of each clades were morphologically identified
cvb249tetr004	625[0n]	KX420135	500[5n]	KX420335	432[0n]	KX420238	0	10-Mar-2013	Tetradonia marginalis	adult	Eciton burchellii	colony ID EB6	collected during host colony emigration	vouchered: private collection	Personal Collection of Christoph Von Beeren	specimen were first sort into genetic clades and later 20 specimens of each clades were morphologically identified
cvb176tetr002	658[0n]	KX420137	0	n.a.	0	n.a.	0	03-Mar-2013	Tetradonia marginalis	adult	Eciton burchellii	colony ID EB5	collected during host colony raid	vouchered: private collection	Personal Collection of Christoph Von Beeren	specimen were first sort into genetic clades and later 20 specimens of each clades were morphologically identified
cvb371tetr005	658[0n]	KX420139	503[2n]	KX420336	431[1n]	KX420239	0	18-Mar-2013	Tetradonia marginalis	adult	Eciton burchellii	colony ID EB4	collected during host colony emigration	vouchered: private collection	Personal Collection of Christoph Von Beeren	specimen were first sort into genetic clades and later 20 specimens of each clades were morphologically identified
cvb019tetr002	658[0n]	KX420140	0	n.a.	0	n.a.	0	10-Feb-2013	Tetradonia marginalis	adult	Eciton burchellii	colony ID EB3	collected during host colony emigration	vouchered: private collection	Personal Collection of Christoph Von Beeren	specimen were first sort into genetic clades and later 20 specimens of each clades were morphologically identified
cvb019tetr001	658[0n]	KX420141	499[6n]	KX420337	430[2n]	KX420240	0	10-Feb-2013	Tetradonia marginalis	adult	Eciton burchellii	colony ID EB3	collected during host colony emigration	vouchered: private collection	Personal Collection of Christoph Von Beeren	specimen were first sort into genetic clades and later 20 specimens of each clades were morphologically identified
cvb006tetr001	658[0n]	KX420142	529[1n]	KX420338	431[1n]	KX420241	0	08-Feb-2013	Tetradonia marginalis	adult	Eciton burchellii	colony ID EB2	collected during host colony emigration	vouchered: private collection	Personal Collection of Christoph Von Beeren	specimen were first sort into genetic clades and later 20 specimens of each clades were morphologically identified
cvb007tetr004	658[0n]	KX420103	0	n.a.	0	n.a.	0	08-Feb-2013	Tetradonia marginalis	adult	Eciton burchellii	colony ID EB2	collected during host colony emigration	vouchered: private collection	Personal Collection of Christoph Von Beeren	specimen were first sort into genetic clades and later 20 specimens of each clades were morphologically identified
cvb541tetr002	658[0n]	KX420105	0	n.a.	429[3n]	KX420231	0	07-Apr-2013	Tetradonia marginalis	adult	Eciton hamatum	colony ID EH10	collected during host colony emigration	vouchered: private collection	Personal Collection of Christoph Von Beeren	specimen were first sort into genetic clades and later 20 specimens of each clades were morphologically identified
cvb541tetr001	658[0n]	KX420106	505[0n]	KX420329	429[3n]	KX420232	0	07-Apr-2013	Tetradonia marginalis	adult	Eciton hamatum	colony ID EH10	collected during host colony emigration	vouchered: private collection	Personal Collection of Christoph Von Beeren	specimen were first sort into genetic clades and later 20 specimens of each clades were morphologically identified
cvb316tetr006	658[0n]	KX420107	0	n.a.	0	n.a.	0	17-Mar-2013	Tetradonia marginalis	adult	Eciton hamatum	colony ID EH4	collected during host colony emigration	vouchered: private collection	Personal Collection of Christoph Von Beeren	specimen were first sort into genetic clades and later 20 specimens of each clades were morphologically identified
cvb015tetr001	658[0n]	KX420051	502[3n]	KX420315	432[0n]	KX420218	0	09-Feb-2013	Tetradonia marginalis	adult	Eciton burchellii	colony ID EB3	collected during host colony emigration	museum vouchered	Kyushu University, Museum	specimen were first sort into genetic clades and later 20 specimens of each clades were morphologically identified
cvb410tetr003	658[0n]	KX420032	503[2n]	KX420311	432[0n]	KX420215	0	23-Mar-2013	Tetradonia marginalis	adult	Eciton burchellii	colony ID EB10	collected during host colony emigration	vouchered: private collection	Personal Collection of Christoph Von Beeren	specimen were first sort into genetic clades and later 20 specimens of each clades were morphologically identified
cvb533tetr005	658[0n]	KX420108	0	n.a.	0	n.a.	0	06-Apr-2013	Tetradonia marginalis	adult	Eciton burchellii	colony ID EB12	collected during host colony raid	vouchered: private collection	Personal Collection of Christoph Von Beeren	specimen were first sort into genetic clades and later 20 specimens of each clades were morphologically identified
cvb533tetr004	632[0n]	KX420109	504[1n]	KX420330	432[0n]	KX420233	0	06-Apr-2013	Tetradonia marginalis	adult	Eciton burchellii	colony ID EB12	collected during host colony raid	vouchered: private collection	Personal Collection of Christoph Von Beeren	specimen were first sort into genetic clades and later 20 specimens of each clades were morphologically identified
cvb533tetr003	658[0n]	KX420110	503[2n]	KX420331	431[1n]	KX420234	0	06-Apr-2013	Tetradonia marginalis	adult	Eciton burchellii	colony ID EB12	collected during host colony raid	vouchered: private collection	Personal Collection of Christoph Von Beeren	specimen were first sort into genetic clades and later 20 specimens of each clades were morphologically identified
cvb533tetr002	658[0n]	KX420111	0	n.a.	0	n.a.	0	06-Apr-2013	Tetradonia marginalis	adult	Eciton burchellii	colony ID EB12	collected during host colony raid	vouchered: private collection	Personal Collection of Christoph Von Beeren	specimen were first sort into genetic clades and later 20 specimens of each clades were morphologically identified
cvb533tetr001	658[0n]	KX420034	0	n.a.	0	n.a.	0	06-Apr-2013	Tetradonia marginalis	adult	Eciton burchellii	colony ID EB12	collected during host colony raid	vouchered: private collection	Personal Collection of Christoph Von Beeren	specimen were first sort into genetic clades and later 20 specimens of each clades were morphologically identified
cvb541tetr008	658[0n]	KX420005	0	n.a.	0	n.a.	0	07-Apr-2013	Tetradonia marginalis	adult	Eciton hamatum	colony ID EH10	collected during host colony emigration	vouchered: private collection	Personal Collection of Christoph Von Beeren	specimen were first sort into genetic clades and later 20 specimens of each clades were morphologically identified
cvb541tetr009	658[0n]	KX420102	0	n.a.	0	n.a.	0	07-Apr-2013	Tetradonia marginalis	adult	Eciton hamatum	colony ID EH10	collected during host colony emigration	vouchered: private collection	Personal Collection of Christoph Von Beeren	specimen were first sort into genetic clades and later 20 specimens of each clades were morphologically identified
cvb541tetr011	658[0n]	KX420101	0	n.a.	0	n.a.	0	07-Apr-2013	Tetradonia marginalis	adult	Eciton hamatum	colony ID EH10	collected during host colony emigration	vouchered: private collection	Personal Collection of Christoph Von Beeren	specimen were first sort into genetic clades and later 20 specimens of each clades were morphologically identified
cvb398tetr003	658[0n]	KX420035	501[4n]	KX420312	0	n.a.	0	21-Mar-2013	Tetradonia marginalis	adult	Eciton vagans	colony ID EV3	collected during host colony emigration	vouchered: private collection	Personal Collection of Christoph Von Beeren	specimen were first sort into genetic clades and later 20 specimens of each clades were morphologically identified
cvb398tetr002	658[0n]	KX420036	0	n.a.	0	n.a.	0	21-Mar-2013	Tetradonia marginalis	adult	Eciton vagans	colony ID EV3	collected during host colony emigration	vouchered: private collection	Personal Collection of Christoph Von Beeren	specimen were first sort into genetic clades and later 20 specimens of each clades were morphologically identified
cvb676tetr006	658[0n]	KX420100	0	n.a.	0	n.a.	0	31-Mar-2014	Tetradonia marginalis	adult	Eciton hamatum	colony ID EH13	collected during host colony emigration	vouchered: private collection	Personal Collection of Christoph Von Beeren	specimen were first sort into genetic clades and later 20 specimens of each clades were morphologically identified
cvb676tetr010	658[0n]	KX420099	0	n.a.	0	n.a.	0	31-Mar-2014	Tetradonia marginalis	adult	Eciton hamatum	colony ID EH13	collected during host colony emigration	vouchered: private collection	Personal Collection of Christoph Von Beeren	specimen were first sort into genetic clades and later 20 specimens of each clades were morphologically identified
cvb048tetr008	658[0n]	KX420098	0	n.a.	0	n.a.	0	14-Feb-2013	Tetradonia marginalis	adult	Eciton hamatum	colony ID EH3	collected during host colony emigration	vouchered: private collection	Personal Collection of Christoph Von Beeren	specimen were first sort into genetic clades and later 20 specimens of each clades were morphologically identified
cvb048tetr009	658[0n]	KX420097	0	n.a.	0	n.a.	0	14-Feb-2013	Tetradonia marginalis	adult	Eciton hamatum	colony ID EH3	collected during host colony emigration	vouchered: private collection	Personal Collection of Christoph Von Beeren	specimen were first sort into genetic clades and later 20 specimens of each clades were morphologically identified
cvb048tetr010	658[0n]	KX420096	0	n.a.	0	n.a.	0	14-Feb-2013	Tetradonia marginalis	adult	Eciton hamatum	colony ID EH3	collected during host colony emigration	museum vouchered	Kyushu University, Museum	specimen were first sort into genetic clades and later 20 specimens of each clades were morphologically identified
cvb316tetr008	658[0n]	KX420095	0	n.a.	0	n.a.	0	17-Mar-2013	Tetradonia marginalis	adult	Eciton hamatum	colony ID EH4	collected during host colony emigration	vouchered: private collection	Personal Collection of Christoph Von Beeren	specimen were first sort into genetic clades and later 20 specimens of each clades were morphologically identified
cvb316tetr011	658[0n]	KX420094	0	n.a.	0	n.a.	1	17-Mar-2013	Tetradonia marginalis	adult	Eciton hamatum	colony ID EH4	collected during host colony emigration	vouchered: private collection	Personal Collection of Christoph Von Beeren	specimen were first sort into genetic clades and later 20 specimens of each clades were morphologically identified
cvb433tetr007	658[0n]	KX420093	0	n.a.	0	n.a.	0	25-Mar-2013	Tetradonia marginalis	adult	Eciton hamatum	colony ID EH7	collected during host colony emigration	vouchered: private collection	Personal Collection of Christoph Von Beeren	specimen were first sort into genetic clades and later 20 specimens of each clades were morphologically identified
cvb433tetr008	658[0n]	KX420092	0	n.a.	0	n.a.	0	25-Mar-2013	Tetradonia marginalis	adult	Eciton hamatum	colony ID EH7	collected during host colony emigration	vouchered: private collection	Personal Collection of Christoph Von Beeren	specimen were first sort into genetic clades and later 20 specimens of each clades were morphologically identified
cvb433tetr010	658[0n]	KX420091	0	n.a.	0	n.a.	0	25-Mar-2013	Tetradonia marginalis	adult	Eciton hamatum	colony ID EH7	collected during host colony emigration	vouchered: private collection	Personal Collection of Christoph Von Beeren	specimen were first sort into genetic clades and later 20 specimens of each clades were morphologically identified
cvb410tetr002	658[0n]	KX420033	0	n.a.	0	n.a.	0	23-Mar-2013	Tetradonia marginalis	adult	Eciton burchellii	colony ID EB10	collected during host colony emigration	vouchered: private collection	Personal Collection of Christoph Von Beeren	specimen were first sort into genetic clades and later 20 specimens of each clades were morphologically identified
cvb399tetr001	658[0n]	KX420047	0	n.a.	0	n.a.	0	21-Mar-2013	Tetradonia marginalis	adult	Eciton hamatum	colony ID EH6	collected during host colony emigration	vouchered: private collection	Personal Collection of Christoph Von Beeren	specimen were first sort into genetic clades and later 20 specimens of each clades were morphologically identified
cvb410tetr001	658[0n]	KX420112	0	n.a.	0	n.a.	0	23-Mar-2013	Tetradonia marginalis	adult	Eciton burchellii	colony ID EB10	collected during host colony emigration	vouchered: private collection	Personal Collection of Christoph Von Beeren	specimen were first sort into genetic clades and later 20 specimens of each clades were morphologically identified
cvb038tetr015	658[0n]	KX420136	0	n.a.	0	n.a.	0	12-Feb-2013	Tetradonia marginalis	adult	Eciton burchellii	colony ID EB1	collected during host colony emigration	museum vouchered	Connecticut State Museum of Natural History	specimen were first sort into genetic clades and later 20 specimens of each clades were morphologically identified
cvb382tetr001	658[0n]	KX420048	0	n.a.	0	n.a.	0	19-Mar-2013	Tetradonia marginalis	adult	Eciton hamatum	colony ID EH5	collected during host colony raid	vouchered: private collection	Personal Collection of Christoph Von Beeren	specimen were first sort into genetic clades and later 20 specimens of each clades were morphologically identified
cvb038tetr016	658[0n]	KX420138	0	n.a.	0	n.a.	0	12-Feb-2013	Tetradonia marginalis	adult	Eciton burchellii	colony ID EB1	collected during host colony emigration	museum vouchered	Kyushu University, Museum	specimen were first sort into genetic clades and later 20 specimens of each clades were morphologically identified
cvb097tetr010	658[0n]	KX420104	0	n.a.	0	n.a.	0	19-Feb-2013	Tetradonia marginalis	adult	Eciton lucanoides	colony ID EL1	collected during host colony emigration	museum vouchered	Kyushu University, Museum	specimen were first sort into genetic clades and later 20 specimens of each clades were morphologically identified
cvb433tetr011	658[0n]	KX420090	0	n.a.	0	n.a.	0	25-Mar-2013	Tetradonia marginalis	adult	Eciton hamatum	colony ID EH7	collected during host colony emigration	museum vouchered	Kyushu University, Museum	specimen were first sort into genetic clades and later 20 specimens of each clades were morphologically identified
cvb097tetr003	658[0n]	KX420052	503[2n]	KX420316	432[0n]	KX420219	0	19-Feb-2013	Tetradonia marginalis	adult	Eciton lucanoides	colony ID EL1	collected during host colony emigration	vouchered: private collection	Personal Collection of Christoph Von Beeren	specimen were first sort into genetic clades and later 20 specimens of each clades were morphologically identified
cvb097tetr002	658[0n]	KX420053	0	n.a.	0	n.a.	0	19-Feb-2013	Tetradonia marginalis	adult	Eciton lucanoides	colony ID EL1	collected during host colony emigration	vouchered: private collection	Personal Collection of Christoph Von Beeren	specimen were first sort into genetic clades and later 20 specimens of each clades were morphologically identified
cvb097tetr001	658[0n]	KX420054	501[4n]	KX420317	432[0n]	KX420220	1	19-Feb-2013	Tetradonia marginalis	adult	Eciton lucanoides	colony ID EL1	collected during host colony emigration	museum vouchered	Kyushu University, Museum	specimen were first sort into genetic clades and later 20 specimens of each clades were morphologically identified
cvb104tetr004	658[0n]	KX420055	0	n.a.	0	n.a.	0	21-Feb-2013	Tetradonia marginalis	adult	Eciton lucanoides	colony ID EL2	collected during host colony emigration	vouchered: private collection	Personal Collection of Christoph Von Beeren	specimen were first sort into genetic clades and later 20 specimens of each clades were morphologically identified
cvb104tetr003	658[0n]	KX420056	0	n.a.	0	n.a.	0	21-Feb-2013	Tetradonia marginalis	adult	Eciton lucanoides	colony ID EL2	collected during host colony emigration	vouchered: private collection	Personal Collection of Christoph Von Beeren	specimen were first sort into genetic clades and later 20 specimens of each clades were morphologically identified
cvb104tetr002	658[0n]	KX420057	0	n.a.	0	n.a.	0	21-Feb-2013	Tetradonia marginalis	adult	Eciton lucanoides	colony ID EL2	collected during host colony emigration	vouchered: private collection	Personal Collection of Christoph Von Beeren	specimen were first sort into genetic clades and later 20 specimens of each clades were morphologically identified
cvb451tetr008	658[0n]	KX420010	0	n.a.	0	n.a.	0	29-Mar-2013	Tetradonia marginalis	adult	Eciton hamatum	colony ID EH8	collected during host colony emigration	museum vouchered	Kyushu University, Museum	specimen were first sort into genetic clades and later 20 specimens of each clades were morphologically identified
cvb571tetr001	658[0n]	KX420059	505[0n]	KX420318	432[0n]	KX420221	2	08-Apr-2013	Tetradonia marginalis	adult	Eciton burchellii	colony ID EB11	collected during host colony emigration	vouchered: private collection	Personal Collection of Christoph Von Beeren	specimen were first sort into genetic clades and later 20 specimens of each clades were morphologically identified
cvb320tetr003	658[0n]	KX420060	502[3n]	KX420319	432[0n]	KX420222	0	17-Mar-2013	Tetradonia marginalis	adult	Eciton burchellii	colony ID EB8	collected during host colony emigration	vouchered: private collection	Personal Collection of Christoph Von Beeren	specimen were first sort into genetic clades and later 20 specimens of each clades were morphologically identified
cvb320tetr002	658[0n]	KX420061	504[1n]	KX420320	432[0n]	KX420223	0	17-Mar-2013	Tetradonia marginalis	adult	Eciton burchellii	colony ID EB8	collected during host colony emigration	vouchered: private collection	Personal Collection of Christoph Von Beeren	specimen were first sort into genetic clades and later 20 specimens of each clades were morphologically identified
cvb320tetr001	658[0n]	KX420062	0	n.a.	0	n.a.	0	17-Mar-2013	Tetradonia marginalis	adult	Eciton burchellii	colony ID EB8	collected during host colony emigration	vouchered: private collection	Personal Collection of Christoph Von Beeren	specimen were first sort into genetic clades and later 20 specimens of each clades were morphologically identified
cvb249tetr003	658[0n]	KX420063	0	n.a.	0	n.a.	0	10-Mar-2013	Tetradonia marginalis	adult	Eciton burchellii	colony ID EB6	collected during host colony emigration	vouchered: private collection	Personal Collection of Christoph Von Beeren	specimen were first sort into genetic clades and later 20 specimens of each clades were morphologically identified
cvb249tetr002	658[0n]	KX420064	499[6n]	KX420321	431[1n]	KX420224	0	10-Mar-2013	Tetradonia marginalis	adult	Eciton burchellii	colony ID EB6	collected during host colony emigration	vouchered: private collection	Personal Collection of Christoph Von Beeren	specimen were first sort into genetic clades and later 20 specimens of each clades were morphologically identified
cvb249tetr001	658[0n]	KX420065	0	n.a.	0	n.a.	0	10-Mar-2013	Tetradonia marginalis	adult	Eciton burchellii	colony ID EB6	collected during host colony emigration	vouchered: private collection	Personal Collection of Christoph Von Beeren	specimen were first sort into genetic clades and later 20 specimens of each clades were morphologically identified
cvb705tetr001	658[0n]	KX420050	0	n.a.	0	n.a.	0	09-Apr-2014	Tetradonia marginalis	adult	Eciton lucanoides	colony ID EL3	collected during host colony raid	vouchered: private collection	Personal Collection of Christoph Von Beeren	specimen were first sort into genetic clades and later 20 specimens of each clades were morphologically identified
cvb705tetr002	658[0n]	KX420049	0	n.a.	0	n.a.	0	09-Apr-2014	Tetradonia marginalis	adult	Eciton lucanoides	colony ID EL3	collected during host colony raid	vouchered: private collection	Personal Collection of Christoph Von Beeren	specimen were first sort into genetic clades and later 20 specimens of each clades were morphologically identified
cvb513tetr003	647[0n]	KX420134	0	n.a.	0	n.a.	0	04-Apr-2013	Tetradonia marginalis	adult	Eciton burchellii	colony ID EB11	collected in host refuse deposit	vouchered: private collection	Personal Collection of Christoph Von Beeren	specimen were first sort into genetic clades and later 20 specimens of each clades were morphologically identified
cvb713tetr001	650[0n]	KX420133	0	n.a.	0	n.a.	0	13-Apr-2014	Tetradonia marginalis	adult	Eciton lucanoides	colony ID EL3	collected during host colony raid	vouchered: private collection	Personal Collection of Christoph Von Beeren	specimen were first sort into genetic clades and later 20 specimens of each clades were morphologically identified
cvb713tetr002	650[0n]	KX420132	0	n.a.	0	n.a.	0	13-Apr-2014	Tetradonia marginalis	adult	Eciton lucanoides	colony ID EL3	collected during host colony raid	vouchered: private collection	Personal Collection of Christoph Von Beeren	specimen were first sort into genetic clades and later 20 specimens of each clades were morphologically identified
cvb048tetr001	658[0n]	KX420128	0	n.a.	0	n.a.	0	14-Feb-2013	Tetradonia marginalis	adult	Eciton hamatum	colony ID EH3	collected during host colony emigration	vouchered: private collection	Personal Collection of Christoph Von Beeren	specimen were first sort into genetic clades and later 20 specimens of each clades were morphologically identified
cvb716tetr001	656[0n]	KX420123	0	n.a.	0	n.a.	1	12-Apr-2014	Tetradonia marginalis	adult	Eciton burchellii	colony ID EB17	collected during host colony emigration	vouchered: private collection	Personal Collection of Christoph Von Beeren	specimen were first sort into genetic clades and later 20 specimens of each clades were morphologically identified
cvb716tetr002	658[0n]	KX420122	0	n.a.	0	n.a.	0	12-Apr-2014	Tetradonia marginalis	adult	Eciton burchellii	colony ID EB17	collected during host colony emigration	vouchered: private collection	Personal Collection of Christoph Von Beeren	specimen were first sort into genetic clades and later 20 specimens of each clades were morphologically identified
cvb713tetr003	658[0n]	KX420120	0	n.a.	0	n.a.	0	13-Apr-2014	Tetradonia marginalis	adult	Eciton lucanoides	colony ID EL3	collected during host colony raid	vouchered: private collection	Personal Collection of Christoph Von Beeren	specimen were first sort into genetic clades and later 20 specimens of each clades were morphologically identified
cvb713tetr004	658[0n]	KX420119	0	n.a.	0	n.a.	0	13-Apr-2014	Tetradonia marginalis	adult	Eciton lucanoides	colony ID EL3	collected during host colony raid	vouchered: private collection	Personal Collection of Christoph Von Beeren	specimen were first sort into genetic clades and later 20 specimens of each clades were morphologically identified
cvb410tetr004	658[0n]	KX420118	0	n.a.	0	n.a.	0	23-Mar-2013	Tetradonia marginalis	adult	Eciton burchellii	colony ID EB10	collected during host colony emigration	vouchered: private collection	Personal Collection of Christoph Von Beeren	specimen were first sort into genetic clades and later 20 specimens of each clades were morphologically identified
cvb499tetr002	658[0n]	KX420115	0	n.a.	0	n.a.	0	03-Apr-2013	Tetradonia marginalis	adult	Eciton hamatum	colony ID EH9	collected during host colony emigration	vouchered: private collection	Personal Collection of Christoph Von Beeren	specimen were first sort into genetic clades and later 20 specimens of each clades were morphologically identified
cvb100tetr006	658[0n]	KX420113	0	n.a.	0	n.a.	0	19-Feb-2013	Tetradonia marginalis	adult	Eciton lucanoides	colony ID EL1	collected during host colony emigration	vouchered: private collection	Personal Collection of Christoph Von Beeren	specimen were first sort into genetic clades and later 20 specimens of each clades were morphologically identified
cvb038tetr007	658[0n]	KX420030	0	n.a.	0	n.a.	0	12-Feb-2013	Tetradonia marginalis	adult	Eciton burchellii	colony ID EB1	collected during host colony emigration	vouchered: private collection	Personal Collection of Christoph Von Beeren	specimen were first sort into genetic clades and later 20 specimens of each clades were morphologically identified
cvb038tetr008	658[0n]	KX420029	0	n.a.	0	n.a.	0	12-Feb-2013	Tetradonia marginalis	adult	Eciton burchellii	colony ID EB1	collected during host colony emigration	vouchered: private collection	Personal Collection of Christoph Von Beeren	specimen were first sort into genetic clades and later 20 specimens of each clades were morphologically identified
cvb038tetr009	658[0n]	KX420028	0	n.a.	0	n.a.	0	12-Feb-2013	Tetradonia marginalis	adult	Eciton burchellii	colony ID EB1	collected during host colony emigration	vouchered: private collection	Personal Collection of Christoph Von Beeren	specimen were first sort into genetic clades and later 20 specimens of each clades were morphologically identified
cvb038tetr011	658[0n]	KX420026	0	n.a.	0	n.a.	0	12-Feb-2013	Tetradonia marginalis	adult	Eciton burchellii	colony ID EB1	collected during host colony emigration	museum vouchered	Kyushu University, Museum	specimen were first sort into genetic clades and later 20 specimens of each clades were morphologically identified
cvb015tetr006	658[0n]	KX420025	0	n.a.	0	n.a.	0	09-Feb-2013	Tetradonia marginalis	adult	Eciton burchellii	colony ID EB3	collected during host colony emigration	vouchered: private collection	Personal Collection of Christoph Von Beeren	specimen were first sort into genetic clades and later 20 specimens of each clades were morphologically identified
cvb015tetr007	658[0n]	KX420024	0	n.a.	0	n.a.	0	09-Feb-2013	Tetradonia marginalis	adult	Eciton burchellii	colony ID EB3	collected during host colony emigration	vouchered: private collection	Personal Collection of Christoph Von Beeren	specimen were first sort into genetic clades and later 20 specimens of each clades were morphologically identified
cvb015tetr008	658[0n]	KX420023	0	n.a.	0	n.a.	0	09-Feb-2013	Tetradonia marginalis	adult	Eciton burchellii	colony ID EB3	collected during host colony emigration	vouchered: private collection	Personal Collection of Christoph Von Beeren	specimen were first sort into genetic clades and later 20 specimens of each clades were morphologically identified
cvb213tetr001	658[0n]	KX420066	501[4n]	KX420322	432[0n]	KX420225	8	08-Mar-2013	Tetradonia marginalis	adult	Eciton burchellii	colony ID EB7	collected during host colony raid	museum vouchered	Kyushu University, Museum	specimen were first sort into genetic clades and later 20 specimens of each clades were morphologically identified
cvb209tetr001	658[0n]	KX420067	536[3n]	KX420323	430[2n]	KX420226	0	06-Mar-2013	Tetradonia marginalis	adult	Eciton burchellii	colony ID EB7	collected during host colony emigration	vouchered: private collection	Personal Collection of Christoph Von Beeren	specimen were first sort into genetic clades and later 20 specimens of each clades were morphologically identified
cvb371tetr001	658[0n]	KX420021	0	n.a.	0	n.a.	0	18-Mar-2013	Tetradonia marginalis	adult	Eciton burchellii	colony ID EB4	collected during host colony emigration	vouchered: private collection	Personal Collection of Christoph Von Beeren	specimen were first sort into genetic clades and later 20 specimens of each clades were morphologically identified
cvb689tetr001	647[0n]	KX420075	0	n.a.	0	n.a.	0	04-Apr-2014	Tetradonia marginalis	adult	Eciton hamatum	colony ID EH14	collected during host colony emigration	vouchered: private collection	Personal Collection of Christoph Von Beeren	specimen were first sort into genetic clades and later 20 specimens of each clades were morphologically identified
cvb158tetr003	658[0n]	KX420068	0	n.a.	0	n.a.	0	02-Mar-2013	Tetradonia marginalis	adult	Eciton burchellii	colony ID EB5	collected during host colony emigration	vouchered: private collection	Personal Collection of Christoph Von Beeren	specimen were first sort into genetic clades and later 20 specimens of each clades were morphologically identified
cvb676tetr004	658[0n]	KX420076	0	n.a.	0	n.a.	0	31-Mar-2014	Tetradonia marginalis	adult	Eciton hamatum	colony ID EH13	collected during host colony emigration	vouchered: private collection	Personal Collection of Christoph Von Beeren	specimen were first sort into genetic clades and later 20 specimens of each clades were morphologically identified
cvb158tetr002	658[0n]	KX420069	501[4n]	KX420324	432[0n]	KX420227	0	02-Mar-2013	Tetradonia marginalis	adult	Eciton burchellii	colony ID EB5	collected during host colony emigration	vouchered: private collection	Personal Collection of Christoph Von Beeren	specimen were first sort into genetic clades and later 20 specimens of each clades were morphologically identified
cvb158tetr001	658[0n]	KX420070	504[1n]	KX420325	430[2n]	KX420228	0	02-Mar-2013	Tetradonia marginalis	adult	Eciton burchellii	colony ID EB5	collected during host colony emigration	vouchered: private collection	Personal Collection of Christoph Von Beeren	specimen were first sort into genetic clades and later 20 specimens of each clades were morphologically identified
cvb676tetr001	658[0n]	KX420077	0	n.a.	0	n.a.	0	31-Mar-2014	Tetradonia marginalis	adult	Eciton hamatum	colony ID EH13	collected during host colony emigration	vouchered: private collection	Personal Collection of Christoph Von Beeren	specimen were first sort into genetic clades and later 20 specimens of each clades were morphologically identified
cvb606tetr005	658[0n]	KX420078	0	n.a.	0	n.a.	0	23-Mar-2014	Tetradonia marginalis	adult	Eciton hamatum	colony ID EH12	collected during host colony emigration	vouchered: private collection	Personal Collection of Christoph Von Beeren	specimen were first sort into genetic clades and later 20 specimens of each clades were morphologically identified
cvb371tetr004	658[0n]	KX420071	0	n.a.	0	n.a.	0	18-Mar-2013	Tetradonia marginalis	adult	Eciton burchellii	colony ID EB4	collected during host colony emigration	vouchered: private collection	Personal Collection of Christoph Von Beeren	specimen were first sort into genetic clades and later 20 specimens of each clades were morphologically identified
cvb010tetr004	658[0n]	KX420148	505[0n]	KX420341	432[0n]	KX420244	0	08-Feb-2013	Tetradonia tikalensis	adult	Eciton hamatum	colony ID EH3	collected during host colony emigration	museum vouchered	Kyushu University, Museum	specimen were first sort into genetic clades and later 20 specimens of each clades were morphologically identified
cvb104tetr008	658[0n]	KX420143	0	n.a.	0	n.a.	6	21-Feb-2013	Tetradonia tikalensis	adult	Eciton lucanoides	colony ID EL2	collected during host colony emigration	museum vouchered	Kyushu University, Museum	specimen were first sort into genetic clades and later 20 specimens of each clades were morphologically identified
cvb399tetr003	658[0n]	KX420147	505[0n]	KX420340	431[1n]	KX420243	6	21-Mar-2013	Tetradonia tikalensis	adult	Eciton hamatum	colony ID EH6	collected during host colony emigration	museum vouchered	Kyushu University, Museum	specimen were first sort into genetic clades and later 20 specimens of each clades were morphologically identified
cvb572tetr005	658[0n]	KX420151	0	n.a.	0	n.a.	0	08-Apr-2013	Tetradonia tikalensis	adult	Eciton burchellii	colony ID EB11	collected during host colony emigration	museum vouchered	Connecticut State Museum of Natural History	specimen were first sort into genetic clades and later 20 specimens of each clades were morphologically identified
cvb572tetr008	658[0n]	KX420150	0	n.a.	0	n.a.	0	08-Apr-2013	Tetradonia tikalensis	adult	Eciton burchellii	colony ID EB11	collected during host colony emigration	museum vouchered	Connecticut State Museum of Natural History	specimen were first sort into genetic clades and later 20 specimens of each clades were morphologically identified
cvb572tetr007	658[0n]	KX420149	0	n.a.	0	n.a.	0	08-Apr-2013	Tetradonia tikalensis	adult	Eciton burchellii	colony ID EB11	collected during host colony emigration	museum vouchered	Field Museum of Natural History, Chicago	specimen were first sort into genetic clades and later 20 specimens of each clades were morphologically identified
cvb004tetr001	658[0n]	KX420146	505[0n]	KX420339	432[0n]	KX420242	4	07-Feb-2013	Tetradonia tikalensis	adult	Eciton hamatum	colony ID EH2	collected during host colony raid	museum vouchered	Kyushu University, Museum	specimen were first sort into genetic clades and later 20 specimens of each clades were morphologically identified
cvb048tetr006	658[0n]	KX420145	0	n.a.	0	n.a.	0	14-Feb-2013	Tetradonia tikalensis	adult	Eciton hamatum	colony ID EH3	collected during host colony emigration	museum vouchered	Kyushu University, Museum	specimen were first sort into genetic clades and later 20 specimens of each clades were morphologically identified
cvb399tetr008	658[0n]	KX420144	0	n.a.	0	n.a.	0	21-Mar-2013	Tetradonia tikalensis	adult	Eciton hamatum	colony ID EH6	collected during host colony emigration	vouchered: private collection	Personal Collection of Christoph Von Beeren	specimen were first sort into genetic clades and later 20 specimens of each clades were morphologically identified

## Sheet: Taxonomy
Sample ID	Phylum	Class	Order	Family	Subfamily	Genus	Species	Identifier	Identifier email	Identification method	Taxonomy Notes
cvb119ecbi003	Arthropoda	Insecta	Coleoptera	Staphylinidae	Aleocharinae	Ecitomorpha	Ecitomorpha arachnoides	Munetoshi Maruyama	dendrolasius@gmail.com	morphological examination and COI barcode	high confidence in identification
cvb529tetr005	Arthropoda	Insecta	Coleoptera	Staphylinidae	Aleocharinae	Tetradonia	Tetradonia laselvensis	Munetoshi Maruyama	dendrolasius@gmail.com	morphological examination and COI barcode	high confidence in identification
cvb308tetr008	Arthropoda	Insecta	Coleoptera	Staphylinidae	Aleocharinae	Tetradonia	Tetradonia laselvensis	Munetoshi Maruyama	dendrolasius@gmail.com	morphological examination and COI barcode	high confidence in identification
cvb308tetr007	Arthropoda	Insecta	Coleoptera	Staphylinidae	Aleocharinae	Tetradonia	Tetradonia laselvensis	Munetoshi Maruyama	dendrolasius@gmail.com	morphological examination and COI barcode	high confidence in identification
cvb308tetr006	Arthropoda	Insecta	Coleoptera	Staphylinidae	Aleocharinae	Tetradonia	Tetradonia laselvensis	Munetoshi Maruyama	dendrolasius@gmail.com	morphological examination and COI barcode	high confidence in identification
cvb541tetr003	Arthropoda	Insecta	Coleoptera	Staphylinidae	Aleocharinae	Tetradonia	Tetradonia laselvensis	Munetoshi Maruyama	dendrolasius@gmail.com	morphological examination and COI barcode	high confidence in identification
cvb176tetr001	Arthropoda	Insecta	Coleoptera	Staphylinidae	Aleocharinae	Tetradonia	Tetradonia laselvensis	Munetoshi Maruyama	dendrolasius@gmail.com	morphological examination and COI barcode	high confidence in identification
cvb572tetr006	Arthropoda	Insecta	Coleoptera	Staphylinidae	Aleocharinae	Tetradonia	Tetradonia laselvensis	Munetoshi Maruyama	dendrolasius@gmail.com	morphological examination and COI barcode	high confidence in identification
cvb176tetr003	Arthropoda	Insecta	Coleoptera	Staphylinidae	Aleocharinae	Tetradonia	Tetradonia laselvensis	Munetoshi Maruyama	dendrolasius@gmail.com	morphological examination and COI barcode	high confidence in identification
cvb541tetr007	Arthropoda	Insecta	Coleoptera	Staphylinidae	Aleocharinae	Tetradonia	Tetradonia laselvensis	Munetoshi Maruyama	dendrolasius@gmail.com	morphological examination and COI barcode	high confidence in identification
cvb399tetr004	Arthropoda	Insecta	Coleoptera	Staphylinidae	Aleocharinae	Tetradonia	Tetradonia laselvensis	Munetoshi Maruyama	dendrolasius@gmail.com	morphological examination and COI barcode	high confidence in identification
cvb104tetr005	Arthropoda	Insecta	Coleoptera	Staphylinidae	Aleocharinae	Tetradonia	Tetradonia laselvensis	Munetoshi Maruyama	dendrolasius@gmail.com	morphological examination and COI barcode	high confidence in identification
cvb529tetr001	Arthropoda	Insecta	Coleoptera	Staphylinidae	Aleocharinae	Tetradonia	Tetradonia laselvensis	Munetoshi Maruyama	dendrolasius@gmail.com	morphological examination and COI barcode	high confidence in identification
cvb529tetr003	Arthropoda	Insecta	Coleoptera	Staphylinidae	Aleocharinae	Tetradonia	Tetradonia laselvensis	Munetoshi Maruyama	dendrolasius@gmail.com	morphological examination and COI barcode	high confidence in identification
cvb104tetr001	Arthropoda	Insecta	Coleoptera	Staphylinidae	Aleocharinae	Tetradonia	Tetradonia laselvensis	Munetoshi Maruyama	dendrolasius@gmail.com	morphological examination and COI barcode	high confidence in identification
cvb606tetr003	Arthropoda	Insecta	Coleoptera	Staphylinidae	Aleocharinae	Tetradonia	Tetradonia laselvensis	Munetoshi Maruyama	dendrolasius@gmail.com	morphological examination and COI barcode	high confidence in identification
cvb692tetr003	Arthropoda	Insecta	Coleoptera	Staphylinidae	Aleocharinae	Tetradonia	Tetradonia laticeps	Munetoshi Maruyama	dendrolasius@gmail.com	morphological examination and COI barcode	high confidence in identification
cvb692tetr002	Arthropoda	Insecta	Coleoptera	Staphylinidae	Aleocharinae	Tetradonia	Tetradonia laticeps	Munetoshi Maruyama	dendrolasius@gmail.com	morphological examination and COI barcode	high confidence in identification
cvb692tetr001	Arthropoda	Insecta	Coleoptera	Staphylinidae	Aleocharinae	Tetradonia	Tetradonia laticeps	Munetoshi Maruyama	dendrolasius@gmail.com	morphological examination and COI barcode	high confidence in identification
cvb591tetr005	Arthropoda	Insecta	Coleoptera	Staphylinidae	Aleocharinae	Tetradonia	Tetradonia laticeps	Munetoshi Maruyama	dendrolasius@gmail.com	morphological examination and COI barcode	high confidence in identification
cvb591tetr004	Arthropoda	Insecta	Coleoptera	Staphylinidae	Aleocharinae	Tetradonia	Tetradonia laticeps	Munetoshi Maruyama	dendrolasius@gmail.com	morphological examination and COI barcode	high confidence in identification
cvb591tetr003	Arthropoda	Insecta	Coleoptera	Staphylinidae	Aleocharinae	Tetradonia	Tetradonia laticeps	Munetoshi Maruyama	dendrolasius@gmail.com	morphological examination and COI barcode	high confidence in identification
cvb591tetr002	Arthropoda	Insecta	Coleoptera	Staphylinidae	Aleocharinae	Tetradonia	Tetradonia laticeps	Munetoshi Maruyama	dendrolasius@gmail.com	morphological examination and COI barcode	high confidence in identification
cvb591tetr001	Arthropoda	Insecta	Coleoptera	Staphylinidae	Aleocharinae	Tetradonia	Tetradonia laticeps	Munetoshi Maruyama	dendrolasius@gmail.com	morphological examination and COI barcode	high confidence in identification
cvb718tetr004	Arthropoda	Insecta	Coleoptera	Staphylinidae	Aleocharinae	Tetradonia	Tetradonia laticeps	Munetoshi Maruyama	dendrolasius@gmail.com	morphological examination and COI barcode	high confidence in identification
cvb718tetr005	Arthropoda	Insecta	Coleoptera	Staphylinidae	Aleocharinae	Tetradonia	Tetradonia laticeps	Munetoshi Maruyama	dendrolasius@gmail.com	morphological examination and COI barcode	high confidence in identification
cvb718sta001	Arthropoda	Insecta	Coleoptera	Staphylinidae	Aleocharinae	Tetradonia	Tetradonia laticeps	Munetoshi Maruyama	dendrolasius@gmail.com	morphological examination and COI barcode	high confidence in identification
cvb591tetr011	Arthropoda	Insecta	Coleoptera	Staphylinidae	Aleocharinae	Tetradonia	Tetradonia laticeps	Munetoshi Maruyama	dendrolasius@gmail.com	morphological examination and COI barcode	high confidence in identification
cvb271tetr002	Arthropoda	Insecta	Coleoptera	Staphylinidae	Aleocharinae	Tetradonia	Tetradonia laticeps	Munetoshi Maruyama	dendrolasius@gmail.com	morphological examination and COI barcode	high confidence in identification
cvb098tetr001	Arthropoda	Insecta	Coleoptera	Staphylinidae	Aleocharinae	Tetradonia	Tetradonia laticeps	Munetoshi Maruyama	dendrolasius@gmail.com	morphological examination and COI barcode	high confidence in identification
cvb095tetr001	Arthropoda	Insecta	Coleoptera	Staphylinidae	Aleocharinae	Tetradonia	Tetradonia laticeps	Munetoshi Maruyama	dendrolasius@gmail.com	morphological examination and COI barcode	high confidence in identification
cvb730tetr011	Arthropoda	Insecta	Coleoptera	Staphylinidae	Aleocharinae	Tetradonia	Tetradonia laticeps	Munetoshi Maruyama	dendrolasius@gmail.com	morphological examination and COI barcode	high confidence in identification
cvb002tetr001	Arthropoda	Insecta	Coleoptera	Staphylinidae	Aleocharinae	Tetradonia	Tetradonia laticeps	Munetoshi Maruyama	dendrolasius@gmail.com	morphological examination and COI barcode	high confidence in identification
cvb095tetr002	Arthropoda	Insecta	Coleoptera	Staphylinidae	Aleocharinae	Tetradonia	Tetradonia laticeps	Munetoshi Maruyama	dendrolasius@gmail.com	morphological examination and COI barcode	high confidence in identification
cvb095tetr003	Arthropoda	Insecta	Coleoptera	Staphylinidae	Aleocharinae	Tetradonia	Tetradonia laticeps	Munetoshi Maruyama	dendrolasius@gmail.com	morphological examination and COI barcode	high confidence in identification
cvb095tetr004	Arthropoda	Insecta	Coleoptera	Staphylinidae	Aleocharinae	Tetradonia	Tetradonia laticeps	Munetoshi Maruyama	dendrolasius@gmail.com	morphological examination and COI barcode	high confidence in identification
cvb193tetr001	Arthropoda	Insecta	Coleoptera	Staphylinidae	Aleocharinae	Tetradonia	Tetradonia laticeps	Munetoshi Maruyama	dendrolasius@gmail.com	morphological examination and COI barcode	high confidence in identification
cvb048tetr007	Arthropoda	Insecta	Coleoptera	Staphylinidae	Aleocharinae	Tetradonia	Tetradonia laticeps	Munetoshi Maruyama	dendrolasius@gmail.com	morphological examination and COI barcode	high confidence in identification
cvb193tetr002	Arthropoda	Insecta	Coleoptera	Staphylinidae	Aleocharinae	Tetradonia	Tetradonia laticeps	Munetoshi Maruyama	dendrolasius@gmail.com	morphological examination and COI barcode	high confidence in identification
cvb002tetr002	Arthropoda	Insecta	Coleoptera	Staphylinidae	Aleocharinae	Tetradonia	Tetradonia laticeps	Munetoshi Maruyama	dendrolasius@gmail.com	morphological examination and COI barcode	high confidence in identification
cvb701tetr015	Arthropoda	Insecta	Coleoptera	Staphylinidae	Aleocharinae	Tetradonia	Tetradonia laticeps	Munetoshi Maruyama	dendrolasius@gmail.com	morphological examination and COI barcode	high confidence in identification
cvb094tetr001	Arthropoda	Insecta	Coleoptera	Staphylinidae	Aleocharinae	Tetradonia	Tetradonia laticeps	Munetoshi Maruyama	dendrolasius@gmail.com	morphological examination and COI barcode	high confidence in identification
cvb002tetr003	Arthropoda	Insecta	Coleoptera	Staphylinidae	Aleocharinae	Tetradonia	Tetradonia laticeps	Munetoshi Maruyama	dendrolasius@gmail.com	morphological examination and COI barcode	high confidence in identification
cvb194tetr001	Arthropoda	Insecta	Coleoptera	Staphylinidae	Aleocharinae	Tetradonia	Tetradonia laticeps	Munetoshi Maruyama	dendrolasius@gmail.com	morphological examination and COI barcode	high confidence in identification
cvb106st004	Arthropoda	Insecta	Coleoptera	Staphylinidae	Aleocharinae	Tetradonia	Tetradonia laticeps	Munetoshi Maruyama	dendrolasius@gmail.com	morphological examination and COI barcode	high confidence in identification
cvb178tetr001	Arthropoda	Insecta	Coleoptera	Staphylinidae	Aleocharinae	Tetradonia	Tetradonia laticeps	Munetoshi Maruyama	dendrolasius@gmail.com	morphological examination and COI barcode	high confidence in identification
cvb730tetr010	Arthropoda	Insecta	Coleoptera	Staphylinidae	Aleocharinae	Tetradonia	Tetradonia laticeps	Munetoshi Maruyama	dendrolasius@gmail.com	morphological examination and COI barcode	high confidence in identification
cvb178tetr002	Arthropoda	Insecta	Coleoptera	Staphylinidae	Aleocharinae	Tetradonia	Tetradonia laticeps	Munetoshi Maruyama	dendrolasius@gmail.com	morphological examination and COI barcode	high confidence in identification
cvb193tetr003	Arthropoda	Insecta	Coleoptera	Staphylinidae	Aleocharinae	Tetradonia	Tetradonia laticeps	Munetoshi Maruyama	dendrolasius@gmail.com	morphological examination and COI barcode	high confidence in identification
cvb676tetr009	Arthropoda	Insecta	Coleoptera	Staphylinidae	Aleocharinae	Tetradonia	Tetradonia laticeps	Munetoshi Maruyama	dendrolasius@gmail.com	morphological examination and COI barcode	high confidence in identification
cvb178tetr003	Arthropoda	Insecta	Coleoptera	Staphylinidae	Aleocharinae	Tetradonia	Tetradonia laticeps	Munetoshi Maruyama	dendrolasius@gmail.com	morphological examination and COI barcode	high confidence in identification
cvb537tetr001	Arthropoda	Insecta	Coleoptera	Staphylinidae	Aleocharinae	Tetradonia	Tetradonia laticeps	Munetoshi Maruyama	dendrolasius@gmail.com	morphological examination and COI barcode	high confidence in identification
cvb398tetr001	Arthropoda	Insecta	Coleoptera	Staphylinidae	Aleocharinae	Tetradonia	Tetradonia laticeps	Munetoshi Maruyama	dendrolasius@gmail.com	morphological examination and COI barcode	high confidence in identification
cvb537tetr002	Arthropoda	Insecta	Coleoptera	Staphylinidae	Aleocharinae	Tetradonia	Tetradonia laticeps	Munetoshi Maruyama	dendrolasius@gmail.com	morphological examination and COI barcode	high confidence in identification
cvb106st003	Arthropoda	Insecta	Coleoptera	Staphylinidae	Aleocharinae	Tetradonia	Tetradonia laticeps	Munetoshi Maruyama	dendrolasius@gmail.com	morphological examination and COI barcode	high confidence in identification
cvb537tetr003	Arthropoda	Insecta	Coleoptera	Staphylinidae	Aleocharinae	Tetradonia	Tetradonia laticeps	Munetoshi Maruyama	dendrolasius@gmail.com	morphological examination and COI barcode	high confidence in identification
cvb106st002	Arthropoda	Insecta	Coleoptera	Staphylinidae	Aleocharinae	Tetradonia	Tetradonia laticeps	Munetoshi Maruyama	dendrolasius@gmail.com	morphological examination and COI barcode	high confidence in identification
cvb049tetr001	Arthropoda	Insecta	Coleoptera	Staphylinidae	Aleocharinae	Tetradonia	Tetradonia laticeps	Munetoshi Maruyama	dendrolasius@gmail.com	morphological examination and COI barcode	high confidence in identification
cvb106st001	Arthropoda	Insecta	Coleoptera	Staphylinidae	Aleocharinae	Tetradonia	Tetradonia laticeps	Munetoshi Maruyama	dendrolasius@gmail.com	morphological examination and COI barcode	high confidence in identification
cvb049tetr002	Arthropoda	Insecta	Coleoptera	Staphylinidae	Aleocharinae	Tetradonia	Tetradonia laticeps	Munetoshi Maruyama	dendrolasius@gmail.com	morphological examination and COI barcode	high confidence in identification
cvb049tetr003	Arthropoda	Insecta	Coleoptera	Staphylinidae	Aleocharinae	Tetradonia	Tetradonia laticeps	Munetoshi Maruyama	dendrolasius@gmail.com	morphological examination and COI barcode	high confidence in identification
cvb178tetr004	Arthropoda	Insecta	Coleoptera	Staphylinidae	Aleocharinae	Tetradonia	Tetradonia laticeps	Munetoshi Maruyama	dendrolasius@gmail.com	morphological examination and COI barcode	high confidence in identification
cvb178tetr005	Arthropoda	Insecta	Coleoptera	Staphylinidae	Aleocharinae	Tetradonia	Tetradonia laticeps	Munetoshi Maruyama	dendrolasius@gmail.com	morphological examination and COI barcode	high confidence in identification
cvb193tetr004	Arthropoda	Insecta	Coleoptera	Staphylinidae	Aleocharinae	Tetradonia	Tetradonia laticeps	Munetoshi Maruyama	dendrolasius@gmail.com	morphological examination and COI barcode	high confidence in identification
cvb193tetr005	Arthropoda	Insecta	Coleoptera	Staphylinidae	Aleocharinae	Tetradonia	Tetradonia laticeps	Munetoshi Maruyama	dendrolasius@gmail.com	morphological examination and COI barcode	high confidence in identification
cvb537tetr004	Arthropoda	Insecta	Coleoptera	Staphylinidae	Aleocharinae	Tetradonia	Tetradonia laticeps	Munetoshi Maruyama	dendrolasius@gmail.com	morphological examination and COI barcode	high confidence in identification
cvb537tetr005	Arthropoda	Insecta	Coleoptera	Staphylinidae	Aleocharinae	Tetradonia	Tetradonia laticeps	Munetoshi Maruyama	dendrolasius@gmail.com	morphological examination and COI barcode	high confidence in identification
cvb001tetr001	Arthropoda	Insecta	Coleoptera	Staphylinidae	Aleocharinae	Tetradonia	Tetradonia laticeps	Munetoshi Maruyama	dendrolasius@gmail.com	morphological examination and COI barcode	high confidence in identification
cvb001tetr002	Arthropoda	Insecta	Coleoptera	Staphylinidae	Aleocharinae	Tetradonia	Tetradonia laticeps	Munetoshi Maruyama	dendrolasius@gmail.com	morphological examination and COI barcode	high confidence in identification
cvb689tetr002	Arthropoda	Insecta	Coleoptera	Staphylinidae	Aleocharinae	Tetradonia	Tetradonia laticeps	Munetoshi Maruyama	dendrolasius@gmail.com	morphological examination and COI barcode	high confidence in identification
cvb020tetr007	Arthropoda	Insecta	Coleoptera	Staphylinidae	Aleocharinae	Tetradonia	Tetradonia laticeps	Munetoshi Maruyama	dendrolasius@gmail.com	morphological examination and COI barcode	high confidence in identification
cvb020tetr006	Arthropoda	Insecta	Coleoptera	Staphylinidae	Aleocharinae	Tetradonia	Tetradonia laticeps	Munetoshi Maruyama	dendrolasius@gmail.com	morphological examination and COI barcode	high confidence in identification
cvb689tetr005	Arthropoda	Insecta	Coleoptera	Staphylinidae	Aleocharinae	Tetradonia	Tetradonia laticeps	Munetoshi Maruyama	dendrolasius@gmail.com	morphological examination and COI barcode	high confidence in identification
cvb595tetr001	Arthropoda	Insecta	Coleoptera	Staphylinidae	Aleocharinae	Tetradonia	Tetradonia laticeps	Munetoshi Maruyama	dendrolasius@gmail.com	morphological examination and COI barcode	high confidence in identification
cvb595tetr002	Arthropoda	Insecta	Coleoptera	Staphylinidae	Aleocharinae	Tetradonia	Tetradonia laticeps	Munetoshi Maruyama	dendrolasius@gmail.com	morphological examination and COI barcode	high confidence in identification
cvb618tetr001	Arthropoda	Insecta	Coleoptera	Staphylinidae	Aleocharinae	Tetradonia	Tetradonia laticeps	Munetoshi Maruyama	dendrolasius@gmail.com	morphological examination and COI barcode	high confidence in identification
cvb038tetr010	Arthropoda	Insecta	Coleoptera	Staphylinidae	Aleocharinae	Tetradonia	Tetradonia laticeps	Munetoshi Maruyama	dendrolasius@gmail.com	morphological examination and COI barcode	high confidence in identification
cvb638tetr001	Arthropoda	Insecta	Coleoptera	Staphylinidae	Aleocharinae	Tetradonia	Tetradonia laticeps	Munetoshi Maruyama	dendrolasius@gmail.com	morphological examination and COI barcode	high confidence in identification
cvb638tetr002	Arthropoda	Insecta	Coleoptera	Staphylinidae	Aleocharinae	Tetradonia	Tetradonia laticeps	Munetoshi Maruyama	dendrolasius@gmail.com	morphological examination and COI barcode	high confidence in identification
cvb638tetr003	Arthropoda	Insecta	Coleoptera	Staphylinidae	Aleocharinae	Tetradonia	Tetradonia laticeps	Munetoshi Maruyama	dendrolasius@gmail.com	morphological examination and COI barcode	high confidence in identification
cvb750tetr006	Arthropoda	Insecta	Coleoptera	Staphylinidae	Aleocharinae	Tetradonia	Tetradonia laticeps	Munetoshi Maruyama	dendrolasius@gmail.com	morphological examination and COI barcode	high confidence in identification
cvb747tetr006	Arthropoda	Insecta	Coleoptera	Staphylinidae	Aleocharinae	Tetradonia	Tetradonia laticeps	Munetoshi Maruyama	dendrolasius@gmail.com	morphological examination and COI barcode	high confidence in identification
cvb747tetr005	Arthropoda	Insecta	Coleoptera	Staphylinidae	Aleocharinae	Tetradonia	Tetradonia laticeps	Munetoshi Maruyama	dendrolasius@gmail.com	morphological examination and COI barcode	high confidence in identification
cvb638tetr004	Arthropoda	Insecta	Coleoptera	Staphylinidae	Aleocharinae	Tetradonia	Tetradonia laticeps	Munetoshi Maruyama	dendrolasius@gmail.com	morphological examination and COI barcode	high confidence in identification
cvb097tetr006	Arthropoda	Insecta	Coleoptera	Staphylinidae	Aleocharinae	Tetradonia	Tetradonia laticeps	Munetoshi Maruyama	dendrolasius@gmail.com	morphological examination and COI barcode	high confidence in identification
cvb638tetr005	Arthropoda	Insecta	Coleoptera	Staphylinidae	Aleocharinae	Tetradonia	Tetradonia laticeps	Munetoshi Maruyama	dendrolasius@gmail.com	morphological examination and COI barcode	high confidence in identification
cvb722tetr001	Arthropoda	Insecta	Coleoptera	Staphylinidae	Aleocharinae	Tetradonia	Tetradonia laticeps	Munetoshi Maruyama	dendrolasius@gmail.com	morphological examination and COI barcode	high confidence in identification
cvb701tetr001	Arthropoda	Insecta	Coleoptera	Staphylinidae	Aleocharinae	Tetradonia	Tetradonia laticeps	Munetoshi Maruyama	dendrolasius@gmail.com	morphological examination and COI barcode	high confidence in identification
cvb097tetr004	Arthropoda	Insecta	Coleoptera	Staphylinidae	Aleocharinae	Tetradonia	Tetradonia laticeps	Munetoshi Maruyama	dendrolasius@gmail.com	morphological examination and COI barcode	high confidence in identification
cvb701tetr010	Arthropoda	Insecta	Coleoptera	Staphylinidae	Aleocharinae	Tetradonia	Tetradonia laticeps	Munetoshi Maruyama	dendrolasius@gmail.com	morphological examination and COI barcode	high confidence in identification
cvb701tetr009	Arthropoda	Insecta	Coleoptera	Staphylinidae	Aleocharinae	Tetradonia	Tetradonia laticeps	Munetoshi Maruyama	dendrolasius@gmail.com	morphological examination and COI barcode	high confidence in identification
cvb701tetr002	Arthropoda	Insecta	Coleoptera	Staphylinidae	Aleocharinae	Tetradonia	Tetradonia laticeps	Munetoshi Maruyama	dendrolasius@gmail.com	morphological examination and COI barcode	high confidence in identification
cvb701tetr004	Arthropoda	Insecta	Coleoptera	Staphylinidae	Aleocharinae	Tetradonia	Tetradonia laticeps	Munetoshi Maruyama	dendrolasius@gmail.com	morphological examination and COI barcode	high confidence in identification
cvb715tetr001	Arthropoda	Insecta	Coleoptera	Staphylinidae	Aleocharinae	Tetradonia	Tetradonia laticeps	Munetoshi Maruyama	dendrolasius@gmail.com	morphological examination and COI barcode	high confidence in identification
cvb715tetr002	Arthropoda	Insecta	Coleoptera	Staphylinidae	Aleocharinae	Tetradonia	Tetradonia laticeps	Munetoshi Maruyama	dendrolasius@gmail.com	morphological examination and COI barcode	high confidence in identification
cvb715tetr003	Arthropoda	Insecta	Coleoptera	Staphylinidae	Aleocharinae	Tetradonia	Tetradonia laticeps	Munetoshi Maruyama	dendrolasius@gmail.com	morphological examination and COI barcode	high confidence in identification
cvb701tetr006	Arthropoda	Insecta	Coleoptera	Staphylinidae	Aleocharinae	Tetradonia	Tetradonia laticeps	Munetoshi Maruyama	dendrolasius@gmail.com	morphological examination and COI barcode	high confidence in identification
cvb271tetr001	Arthropoda	Insecta	Coleoptera	Staphylinidae	Aleocharinae	Tetradonia	Tetradonia laticeps	Munetoshi Maruyama	dendrolasius@gmail.com	morphological examination and COI barcode	high confidence in identification
cvb715tetr004	Arthropoda	Insecta	Coleoptera	Staphylinidae	Aleocharinae	Tetradonia	Tetradonia laticeps	Munetoshi Maruyama	dendrolasius@gmail.com	morphological examination and COI barcode	high confidence in identification
cvb048tetr005	Arthropoda	Insecta	Coleoptera	Staphylinidae	Aleocharinae	Tetradonia	Tetradonia laticeps	Munetoshi Maruyama	dendrolasius@gmail.com	morphological examination and COI barcode	high confidence in identification
cvb048tetr004	Arthropoda	Insecta	Coleoptera	Staphylinidae	Aleocharinae	Tetradonia	Tetradonia laticeps	Munetoshi Maruyama	dendrolasius@gmail.com	morphological examination and COI barcode	high confidence in identification
cvb048tetr003	Arthropoda	Insecta	Coleoptera	Staphylinidae	Aleocharinae	Tetradonia	Tetradonia laticeps	Munetoshi Maruyama	dendrolasius@gmail.com	morphological examination and COI barcode	high confidence in identification
cvb048tetr002	Arthropoda	Insecta	Coleoptera	Staphylinidae	Aleocharinae	Tetradonia	Tetradonia laticeps	Munetoshi Maruyama	dendrolasius@gmail.com	morphological examination and COI barcode	high confidence in identification
cvb715tetr005	Arthropoda	Insecta	Coleoptera	Staphylinidae	Aleocharinae	Tetradonia	Tetradonia laticeps	Munetoshi Maruyama	dendrolasius@gmail.com	morphological examination and COI barcode	high confidence in identification
cvb011tetr001	Arthropoda	Insecta	Coleoptera	Staphylinidae	Aleocharinae	Tetradonia	Tetradonia laticeps	Munetoshi Maruyama	dendrolasius@gmail.com	morphological examination and COI barcode	high confidence in identification
cvb108tetr001	Arthropoda	Insecta	Coleoptera	Staphylinidae	Aleocharinae	Tetradonia	Tetradonia laticeps	Munetoshi Maruyama	dendrolasius@gmail.com	morphological examination and COI barcode	high confidence in identification
cvb721tetr005	Arthropoda	Insecta	Coleoptera	Staphylinidae	Aleocharinae	Tetradonia	Tetradonia laticeps	Munetoshi Maruyama	dendrolasius@gmail.com	morphological examination and COI barcode	high confidence in identification
cvb718tetr001	Arthropoda	Insecta	Coleoptera	Staphylinidae	Aleocharinae	Tetradonia	Tetradonia laticeps	Munetoshi Maruyama	dendrolasius@gmail.com	morphological examination and COI barcode	high confidence in identification
cvb718tetr002	Arthropoda	Insecta	Coleoptera	Staphylinidae	Aleocharinae	Tetradonia	Tetradonia laticeps	Munetoshi Maruyama	dendrolasius@gmail.com	morphological examination and COI barcode	high confidence in identification
cvb718tetr003	Arthropoda	Insecta	Coleoptera	Staphylinidae	Aleocharinae	Tetradonia	Tetradonia laticeps	Munetoshi Maruyama	dendrolasius@gmail.com	morphological examination and COI barcode	high confidence in identification
cvb594tetr004	Arthropoda	Insecta	Coleoptera	Staphylinidae	Aleocharinae	Tetradonia	Tetradonia laticeps	Munetoshi Maruyama	dendrolasius@gmail.com	morphological examination and COI barcode	high confidence in identification
cvb594tetr003	Arthropoda	Insecta	Coleoptera	Staphylinidae	Aleocharinae	Tetradonia	Tetradonia laticeps	Munetoshi Maruyama	dendrolasius@gmail.com	morphological examination and COI barcode	high confidence in identification
cvb594tetr002	Arthropoda	Insecta	Coleoptera	Staphylinidae	Aleocharinae	Tetradonia	Tetradonia laticeps	Munetoshi Maruyama	dendrolasius@gmail.com	morphological examination and COI barcode	high confidence in identification
cvb594tetr001	Arthropoda	Insecta	Coleoptera	Staphylinidae	Aleocharinae	Tetradonia	Tetradonia laticeps	Munetoshi Maruyama	dendrolasius@gmail.com	morphological examination and COI barcode	high confidence in identification
cvb593tetr001	Arthropoda	Insecta	Coleoptera	Staphylinidae	Aleocharinae	Tetradonia	Tetradonia laticeps	Munetoshi Maruyama	dendrolasius@gmail.com	morphological examination and COI barcode	high confidence in identification
cvb734tetr005	Arthropoda	Insecta	Coleoptera	Staphylinidae	Aleocharinae	Tetradonia	Tetradonia laticeps	Munetoshi Maruyama	dendrolasius@gmail.com	morphological examination and COI barcode	high confidence in identification
cvb734tetr004	Arthropoda	Insecta	Coleoptera	Staphylinidae	Aleocharinae	Tetradonia	Tetradonia laticeps	Munetoshi Maruyama	dendrolasius@gmail.com	morphological examination and COI barcode	high confidence in identification
cvb734tetr003	Arthropoda	Insecta	Coleoptera	Staphylinidae	Aleocharinae	Tetradonia	Tetradonia laticeps	Munetoshi Maruyama	dendrolasius@gmail.com	morphological examination and COI barcode	high confidence in identification
cvb734tetr002	Arthropoda	Insecta	Coleoptera	Staphylinidae	Aleocharinae	Tetradonia	Tetradonia laticeps	Munetoshi Maruyama	dendrolasius@gmail.com	morphological examination and COI barcode	high confidence in identification
cvb734tetr001	Arthropoda	Insecta	Coleoptera	Staphylinidae	Aleocharinae	Tetradonia	Tetradonia laticeps	Munetoshi Maruyama	dendrolasius@gmail.com	morphological examination and COI barcode	high confidence in identification
cvb733tetr001	Arthropoda	Insecta	Coleoptera	Staphylinidae	Aleocharinae	Tetradonia	Tetradonia laticeps	Munetoshi Maruyama	dendrolasius@gmail.com	morphological examination and COI barcode	high confidence in identification
cvb725tetr005	Arthropoda	Insecta	Coleoptera	Staphylinidae	Aleocharinae	Tetradonia	Tetradonia laticeps	Munetoshi Maruyama	dendrolasius@gmail.com	morphological examination and COI barcode	high confidence in identification
cvb725tetr004	Arthropoda	Insecta	Coleoptera	Staphylinidae	Aleocharinae	Tetradonia	Tetradonia laticeps	Munetoshi Maruyama	dendrolasius@gmail.com	morphological examination and COI barcode	high confidence in identification
cvb725tetr003	Arthropoda	Insecta	Coleoptera	Staphylinidae	Aleocharinae	Tetradonia	Tetradonia laticeps	Munetoshi Maruyama	dendrolasius@gmail.com	morphological examination and COI barcode	high confidence in identification
cvb725tetr002	Arthropoda	Insecta	Coleoptera	Staphylinidae	Aleocharinae	Tetradonia	Tetradonia laticeps	Munetoshi Maruyama	dendrolasius@gmail.com	morphological examination and COI barcode	high confidence in identification
cvb725tetr001	Arthropoda	Insecta	Coleoptera	Staphylinidae	Aleocharinae	Tetradonia	Tetradonia laticeps	Munetoshi Maruyama	dendrolasius@gmail.com	morphological examination and COI barcode	high confidence in identification
cvb750tetr005	Arthropoda	Insecta	Coleoptera	Staphylinidae	Aleocharinae	Tetradonia	Tetradonia laticeps	Munetoshi Maruyama	dendrolasius@gmail.com	morphological examination and COI barcode	high confidence in identification
cvb750tetr004	Arthropoda	Insecta	Coleoptera	Staphylinidae	Aleocharinae	Tetradonia	Tetradonia laticeps	Munetoshi Maruyama	dendrolasius@gmail.com	morphological examination and COI barcode	high confidence in identification
cvb750tetr003	Arthropoda	Insecta	Coleoptera	Staphylinidae	Aleocharinae	Tetradonia	Tetradonia laticeps	Munetoshi Maruyama	dendrolasius@gmail.com	morphological examination and COI barcode	high confidence in identification
cvb750tetr002	Arthropoda	Insecta	Coleoptera	Staphylinidae	Aleocharinae	Tetradonia	Tetradonia laticeps	Munetoshi Maruyama	dendrolasius@gmail.com	morphological examination and COI barcode	high confidence in identification
cvb747tetr004	Arthropoda	Insecta	Coleoptera	Staphylinidae	Aleocharinae	Tetradonia	Tetradonia laticeps	Munetoshi Maruyama	dendrolasius@gmail.com	morphological examination and COI barcode	high confidence in identification
cvb750tetr001	Arthropoda	Insecta	Coleoptera	Staphylinidae	Aleocharinae	Tetradonia	Tetradonia laticeps	Munetoshi Maruyama	dendrolasius@gmail.com	morphological examination and COI barcode	high confidence in identification
cvb747tetr003	Arthropoda	Insecta	Coleoptera	Staphylinidae	Aleocharinae	Tetradonia	Tetradonia laticeps	Munetoshi Maruyama	dendrolasius@gmail.com	morphological examination and COI barcode	high confidence in identification
cvb747tetr002	Arthropoda	Insecta	Coleoptera	Staphylinidae	Aleocharinae	Tetradonia	Tetradonia laticeps	Munetoshi Maruyama	dendrolasius@gmail.com	morphological examination and COI barcode	high confidence in identification
cvb747tetr001	Arthropoda	Insecta	Coleoptera	Staphylinidae	Aleocharinae	Tetradonia	Tetradonia laticeps	Munetoshi Maruyama	dendrolasius@gmail.com	morphological examination and COI barcode	high confidence in identification
cvb702tetr005	Arthropoda	Insecta	Coleoptera	Staphylinidae	Aleocharinae	Tetradonia	Tetradonia laticeps	Munetoshi Maruyama	dendrolasius@gmail.com	morphological examination and COI barcode	high confidence in identification
cvb702tetr004	Arthropoda	Insecta	Coleoptera	Staphylinidae	Aleocharinae	Tetradonia	Tetradonia laticeps	Munetoshi Maruyama	dendrolasius@gmail.com	morphological examination and COI barcode	high confidence in identification
cvb702tetr003	Arthropoda	Insecta	Coleoptera	Staphylinidae	Aleocharinae	Tetradonia	Tetradonia laticeps	Munetoshi Maruyama	dendrolasius@gmail.com	morphological examination and COI barcode	high confidence in identification
cvb702tetr002	Arthropoda	Insecta	Coleoptera	Staphylinidae	Aleocharinae	Tetradonia	Tetradonia laticeps	Munetoshi Maruyama	dendrolasius@gmail.com	morphological examination and COI barcode	high confidence in identification
cvb702tetr001	Arthropoda	Insecta	Coleoptera	Staphylinidae	Aleocharinae	Tetradonia	Tetradonia laticeps	Munetoshi Maruyama	dendrolasius@gmail.com	morphological examination and COI barcode	high confidence in identification
cvb721sta001	Arthropoda	Insecta	Coleoptera	Staphylinidae	Aleocharinae	Tetradonia	Tetradonia laticeps	Munetoshi Maruyama	dendrolasius@gmail.com	morphological examination and COI barcode	high confidence in identification
cvb721tetr004	Arthropoda	Insecta	Coleoptera	Staphylinidae	Aleocharinae	Tetradonia	Tetradonia laticeps	Munetoshi Maruyama	dendrolasius@gmail.com	morphological examination and COI barcode	high confidence in identification
cvb721tetr003	Arthropoda	Insecta	Coleoptera	Staphylinidae	Aleocharinae	Tetradonia	Tetradonia laticeps	Munetoshi Maruyama	dendrolasius@gmail.com	morphological examination and COI barcode	high confidence in identification
cvb721tetr002	Arthropoda	Insecta	Coleoptera	Staphylinidae	Aleocharinae	Tetradonia	Tetradonia laticeps	Munetoshi Maruyama	dendrolasius@gmail.com	morphological examination and COI barcode	high confidence in identification
cvb721tetr001	Arthropoda	Insecta	Coleoptera	Staphylinidae	Aleocharinae	Tetradonia	Tetradonia laticeps	Munetoshi Maruyama	dendrolasius@gmail.com	morphological examination and COI barcode	high confidence in identification
cvb692tetr005	Arthropoda	Insecta	Coleoptera	Staphylinidae	Aleocharinae	Tetradonia	Tetradonia laticeps	Munetoshi Maruyama	dendrolasius@gmail.com	morphological examination and COI barcode	high confidence in identification
cvb692tetr004	Arthropoda	Insecta	Coleoptera	Staphylinidae	Aleocharinae	Tetradonia	Tetradonia laticeps	Munetoshi Maruyama	dendrolasius@gmail.com	morphological examination and COI barcode	high confidence in identification
cvb687tetr009	Arthropoda	Insecta	Coleoptera	Staphylinidae	Aleocharinae	Tetradonia	Tetradonia lizonae	Munetoshi Maruyama	dendrolasius@gmail.com	morphological examination and COI barcode	high confidence in identification
cvb038tetr014	Arthropoda	Insecta	Coleoptera	Staphylinidae	Aleocharinae	Tetradonia	Tetradonia lizonae	Munetoshi Maruyama	dendrolasius@gmail.com	morphological examination and COI barcode	high confidence in identification
cvb451tetr010	Arthropoda	Insecta	Coleoptera	Staphylinidae	Aleocharinae	Tetradonia	Tetradonia lizonae	Munetoshi Maruyama	dendrolasius@gmail.com	morphological examination and COI barcode	high confidence in identification
cvb451tetr007	Arthropoda	Insecta	Coleoptera	Staphylinidae	Aleocharinae	Tetradonia	Tetradonia lizonae	Munetoshi Maruyama	dendrolasius@gmail.com	morphological examination and COI barcode	high confidence in identification
cvb451tetr006	Arthropoda	Insecta	Coleoptera	Staphylinidae	Aleocharinae	Tetradonia	Tetradonia lizonae	Munetoshi Maruyama	dendrolasius@gmail.com	morphological examination and COI barcode	high confidence in identification
cvb433tetr009	Arthropoda	Insecta	Coleoptera	Staphylinidae	Aleocharinae	Tetradonia	Tetradonia lizonae	Munetoshi Maruyama	dendrolasius@gmail.com	morphological examination and COI barcode	high confidence in identification
cvb316tetr010	Arthropoda	Insecta	Coleoptera	Staphylinidae	Aleocharinae	Tetradonia	Tetradonia lizonae	Munetoshi Maruyama	dendrolasius@gmail.com	morphological examination and COI barcode	high confidence in identification
cvb316tetr009	Arthropoda	Insecta	Coleoptera	Staphylinidae	Aleocharinae	Tetradonia	Tetradonia lizonae	Munetoshi Maruyama	dendrolasius@gmail.com	morphological examination and COI barcode	high confidence in identification
cvb010tetr011	Arthropoda	Insecta	Coleoptera	Staphylinidae	Aleocharinae	Tetradonia	Tetradonia lizonae	Munetoshi Maruyama	dendrolasius@gmail.com	morphological examination and COI barcode	high confidence in identification
cvb010tetr010	Arthropoda	Insecta	Coleoptera	Staphylinidae	Aleocharinae	Tetradonia	Tetradonia lizonae	Munetoshi Maruyama	dendrolasius@gmail.com	morphological examination and COI barcode	high confidence in identification
cvb010tetr009	Arthropoda	Insecta	Coleoptera	Staphylinidae	Aleocharinae	Tetradonia	Tetradonia lizonae	Munetoshi Maruyama	dendrolasius@gmail.com	morphological examination and COI barcode	high confidence in identification
cvb010tetr008	Arthropoda	Insecta	Coleoptera	Staphylinidae	Aleocharinae	Tetradonia	Tetradonia lizonae	Munetoshi Maruyama	dendrolasius@gmail.com	morphological examination and COI barcode	high confidence in identification
cvb010tetr007	Arthropoda	Insecta	Coleoptera	Staphylinidae	Aleocharinae	Tetradonia	Tetradonia lizonae	Munetoshi Maruyama	dendrolasius@gmail.com	morphological examination and COI barcode	high confidence in identification
cvb687tetr010	Arthropoda	Insecta	Coleoptera	Staphylinidae	Aleocharinae	Tetradonia	Tetradonia lizonae	Munetoshi Maruyama	dendrolasius@gmail.com	morphological examination and COI barcode	high confidence in identification
cvb687tetr008	Arthropoda	Insecta	Coleoptera	Staphylinidae	Aleocharinae	Tetradonia	Tetradonia lizonae	Munetoshi Maruyama	dendrolasius@gmail.com	morphological examination and COI barcode	high confidence in identification
cvb687tetr007	Arthropoda	Insecta	Coleoptera	Staphylinidae	Aleocharinae	Tetradonia	Tetradonia lizonae	Munetoshi Maruyama	dendrolasius@gmail.com	morphological examination and COI barcode	high confidence in identification
cvb687tetr006	Arthropoda	Insecta	Coleoptera	Staphylinidae	Aleocharinae	Tetradonia	Tetradonia lizonae	Munetoshi Maruyama	dendrolasius@gmail.com	morphological examination and COI barcode	high confidence in identification
cvb676tetr008	Arthropoda	Insecta	Coleoptera	Staphylinidae	Aleocharinae	Tetradonia	Tetradonia lizonae	Munetoshi Maruyama	dendrolasius@gmail.com	morphological examination and COI barcode	high confidence in identification
cvb676tetr007	Arthropoda	Insecta	Coleoptera	Staphylinidae	Aleocharinae	Tetradonia	Tetradonia lizonae	Munetoshi Maruyama	dendrolasius@gmail.com	morphological examination and COI barcode	high confidence in identification
cvb606tetr010	Arthropoda	Insecta	Coleoptera	Staphylinidae	Aleocharinae	Tetradonia	Tetradonia lizonae	Munetoshi Maruyama	dendrolasius@gmail.com	morphological examination and COI barcode	high confidence in identification
cvb606tetr009	Arthropoda	Insecta	Coleoptera	Staphylinidae	Aleocharinae	Tetradonia	Tetradonia lizonae	Munetoshi Maruyama	dendrolasius@gmail.com	morphological examination and COI barcode	high confidence in identification
cvb606tetr008	Arthropoda	Insecta	Coleoptera	Staphylinidae	Aleocharinae	Tetradonia	Tetradonia lizonae	Munetoshi Maruyama	dendrolasius@gmail.com	morphological examination and COI barcode	high confidence in identification
cvb606tetr007	Arthropoda	Insecta	Coleoptera	Staphylinidae	Aleocharinae	Tetradonia	Tetradonia lizonae	Munetoshi Maruyama	dendrolasius@gmail.com	morphological examination and COI barcode	high confidence in identification
cvb606tetr006	Arthropoda	Insecta	Coleoptera	Staphylinidae	Aleocharinae	Tetradonia	Tetradonia lizonae	Munetoshi Maruyama	dendrolasius@gmail.com	morphological examination and COI barcode	high confidence in identification
cvb541tetr010	Arthropoda	Insecta	Coleoptera	Staphylinidae	Aleocharinae	Tetradonia	Tetradonia lizonae	Munetoshi Maruyama	dendrolasius@gmail.com	morphological examination and COI barcode	high confidence in identification
cvb499tetr001	Arthropoda	Insecta	Coleoptera	Staphylinidae	Aleocharinae	Tetradonia	Tetradonia lizonae	Munetoshi Maruyama	dendrolasius@gmail.com	morphological examination and COI barcode	high confidence in identification
cvb433tetr006	Arthropoda	Insecta	Coleoptera	Staphylinidae	Aleocharinae	Tetradonia	Tetradonia lizonae	Munetoshi Maruyama	dendrolasius@gmail.com	morphological examination and COI barcode	high confidence in identification
cvb689tetr004	Arthropoda	Insecta	Coleoptera	Staphylinidae	Aleocharinae	Tetradonia	Tetradonia lizonae	Munetoshi Maruyama	dendrolasius@gmail.com	morphological examination and COI barcode	high confidence in identification
cvb689tetr003	Arthropoda	Insecta	Coleoptera	Staphylinidae	Aleocharinae	Tetradonia	Tetradonia lizonae	Munetoshi Maruyama	dendrolasius@gmail.com	morphological examination and COI barcode	high confidence in identification
cvb676tetr005	Arthropoda	Insecta	Coleoptera	Staphylinidae	Aleocharinae	Tetradonia	Tetradonia lizonae	Munetoshi Maruyama	dendrolasius@gmail.com	morphological examination and COI barcode	high confidence in identification
cvb676tetr003	Arthropoda	Insecta	Coleoptera	Staphylinidae	Aleocharinae	Tetradonia	Tetradonia lizonae	Munetoshi Maruyama	dendrolasius@gmail.com	morphological examination and COI barcode	high confidence in identification
cvb676tetr002	Arthropoda	Insecta	Coleoptera	Staphylinidae	Aleocharinae	Tetradonia	Tetradonia lizonae	Munetoshi Maruyama	dendrolasius@gmail.com	morphological examination and COI barcode	high confidence in identification
cvb606tetr004	Arthropoda	Insecta	Coleoptera	Staphylinidae	Aleocharinae	Tetradonia	Tetradonia lizonae	Munetoshi Maruyama	dendrolasius@gmail.com	morphological examination and COI barcode	high confidence in identification
cvb606tetr002	Arthropoda	Insecta	Coleoptera	Staphylinidae	Aleocharinae	Tetradonia	Tetradonia lizonae	Munetoshi Maruyama	dendrolasius@gmail.com	morphological examination and COI barcode	high confidence in identification
cvb606tetr001	Arthropoda	Insecta	Coleoptera	Staphylinidae	Aleocharinae	Tetradonia	Tetradonia lizonae	Munetoshi Maruyama	dendrolasius@gmail.com	morphological examination and COI barcode	high confidence in identification
cvb603tetr005	Arthropoda	Insecta	Coleoptera	Staphylinidae	Aleocharinae	Tetradonia	Tetradonia lizonae	Munetoshi Maruyama	dendrolasius@gmail.com	morphological examination and COI barcode	high confidence in identification
cvb603tetr004	Arthropoda	Insecta	Coleoptera	Staphylinidae	Aleocharinae	Tetradonia	Tetradonia lizonae	Munetoshi Maruyama	dendrolasius@gmail.com	morphological examination and COI barcode	high confidence in identification
cvb603tetr003	Arthropoda	Insecta	Coleoptera	Staphylinidae	Aleocharinae	Tetradonia	Tetradonia lizonae	Munetoshi Maruyama	dendrolasius@gmail.com	morphological examination and COI barcode	high confidence in identification
cvb603tetr002	Arthropoda	Insecta	Coleoptera	Staphylinidae	Aleocharinae	Tetradonia	Tetradonia lizonae	Munetoshi Maruyama	dendrolasius@gmail.com	morphological examination and COI barcode	high confidence in identification
cvb603tetr001	Arthropoda	Insecta	Coleoptera	Staphylinidae	Aleocharinae	Tetradonia	Tetradonia lizonae	Munetoshi Maruyama	dendrolasius@gmail.com	morphological examination and COI barcode	high confidence in identification
cvb541tetr006	Arthropoda	Insecta	Coleoptera	Staphylinidae	Aleocharinae	Tetradonia	Tetradonia lizonae	Munetoshi Maruyama	dendrolasius@gmail.com	morphological examination and COI barcode	high confidence in identification
cvb541tetr005	Arthropoda	Insecta	Coleoptera	Staphylinidae	Aleocharinae	Tetradonia	Tetradonia lizonae	Munetoshi Maruyama	dendrolasius@gmail.com	morphological examination and COI barcode	high confidence in identification
cvb541tetr004	Arthropoda	Insecta	Coleoptera	Staphylinidae	Aleocharinae	Tetradonia	Tetradonia lizonae	Munetoshi Maruyama	dendrolasius@gmail.com	morphological examination and COI barcode	high confidence in identification
cvb488tetr005	Arthropoda	Insecta	Coleoptera	Staphylinidae	Aleocharinae	Tetradonia	Tetradonia lizonae	Munetoshi Maruyama	dendrolasius@gmail.com	morphological examination and COI barcode	high confidence in identification
cvb488tetr004	Arthropoda	Insecta	Coleoptera	Staphylinidae	Aleocharinae	Tetradonia	Tetradonia lizonae	Munetoshi Maruyama	dendrolasius@gmail.com	morphological examination and COI barcode	high confidence in identification
cvb488tetr003	Arthropoda	Insecta	Coleoptera	Staphylinidae	Aleocharinae	Tetradonia	Tetradonia lizonae	Munetoshi Maruyama	dendrolasius@gmail.com	morphological examination and COI barcode	high confidence in identification
cvb488tetr002	Arthropoda	Insecta	Coleoptera	Staphylinidae	Aleocharinae	Tetradonia	Tetradonia lizonae	Munetoshi Maruyama	dendrolasius@gmail.com	morphological examination and COI barcode	high confidence in identification
cvb488tetr001	Arthropoda	Insecta	Coleoptera	Staphylinidae	Aleocharinae	Tetradonia	Tetradonia lizonae	Munetoshi Maruyama	dendrolasius@gmail.com	morphological examination and COI barcode	high confidence in identification
cvb451tetr005	Arthropoda	Insecta	Coleoptera	Staphylinidae	Aleocharinae	Tetradonia	Tetradonia lizonae	Munetoshi Maruyama	dendrolasius@gmail.com	morphological examination and COI barcode	high confidence in identification
cvb433tetr005	Arthropoda	Insecta	Coleoptera	Staphylinidae	Aleocharinae	Tetradonia	Tetradonia lizonae	Munetoshi Maruyama	dendrolasius@gmail.com	morphological examination and COI barcode	high confidence in identification
cvb433tetr004	Arthropoda	Insecta	Coleoptera	Staphylinidae	Aleocharinae	Tetradonia	Tetradonia lizonae	Munetoshi Maruyama	dendrolasius@gmail.com	morphological examination and COI barcode	high confidence in identification
cvb433tetr003	Arthropoda	Insecta	Coleoptera	Staphylinidae	Aleocharinae	Tetradonia	Tetradonia lizonae	Munetoshi Maruyama	dendrolasius@gmail.com	morphological examination and COI barcode	high confidence in identification
cvb433tetr002	Arthropoda	Insecta	Coleoptera	Staphylinidae	Aleocharinae	Tetradonia	Tetradonia lizonae	Munetoshi Maruyama	dendrolasius@gmail.com	morphological examination and COI barcode	high confidence in identification
cvb433tetr001	Arthropoda	Insecta	Coleoptera	Staphylinidae	Aleocharinae	Tetradonia	Tetradonia lizonae	Munetoshi Maruyama	dendrolasius@gmail.com	morphological examination and COI barcode	high confidence in identification
cvb382tetr005	Arthropoda	Insecta	Coleoptera	Staphylinidae	Aleocharinae	Tetradonia	Tetradonia lizonae	Munetoshi Maruyama	dendrolasius@gmail.com	morphological examination and COI barcode	high confidence in identification
cvb382tetr004	Arthropoda	Insecta	Coleoptera	Staphylinidae	Aleocharinae	Tetradonia	Tetradonia lizonae	Munetoshi Maruyama	dendrolasius@gmail.com	morphological examination and COI barcode	high confidence in identification
cvb010tetr006	Arthropoda	Insecta	Coleoptera	Staphylinidae	Aleocharinae	Tetradonia	Tetradonia lizonae	Munetoshi Maruyama	dendrolasius@gmail.com	morphological examination and COI barcode	high confidence in identification
cvb010tetr005	Arthropoda	Insecta	Coleoptera	Staphylinidae	Aleocharinae	Tetradonia	Tetradonia lizonae	Munetoshi Maruyama	dendrolasius@gmail.com	morphological examination and COI barcode	high confidence in identification
cvb316tetr005	Arthropoda	Insecta	Coleoptera	Staphylinidae	Aleocharinae	Tetradonia	Tetradonia lizonae	Munetoshi Maruyama	dendrolasius@gmail.com	morphological examination and COI barcode	high confidence in identification
cvb316tetr004	Arthropoda	Insecta	Coleoptera	Staphylinidae	Aleocharinae	Tetradonia	Tetradonia lizonae	Munetoshi Maruyama	dendrolasius@gmail.com	morphological examination and COI barcode	high confidence in identification
cvb399tetr002	Arthropoda	Insecta	Coleoptera	Staphylinidae	Aleocharinae	Tetradonia	Tetradonia lizonae	Munetoshi Maruyama	dendrolasius@gmail.com	morphological examination and COI barcode	high confidence in identification
cvb382tetr003	Arthropoda	Insecta	Coleoptera	Staphylinidae	Aleocharinae	Tetradonia	Tetradonia lizonae	Munetoshi Maruyama	dendrolasius@gmail.com	morphological examination and COI barcode	high confidence in identification
cvb382tetr002	Arthropoda	Insecta	Coleoptera	Staphylinidae	Aleocharinae	Tetradonia	Tetradonia lizonae	Munetoshi Maruyama	dendrolasius@gmail.com	morphological examination and COI barcode	high confidence in identification
cvb010tetr003	Arthropoda	Insecta	Coleoptera	Staphylinidae	Aleocharinae	Tetradonia	Tetradonia lizonae	Munetoshi Maruyama	dendrolasius@gmail.com	morphological examination and COI barcode	high confidence in identification
cvb010tetr002	Arthropoda	Insecta	Coleoptera	Staphylinidae	Aleocharinae	Tetradonia	Tetradonia lizonae	Munetoshi Maruyama	dendrolasius@gmail.com	morphological examination and COI barcode	high confidence in identification
cvb451tetr003	Arthropoda	Insecta	Coleoptera	Staphylinidae	Aleocharinae	Tetradonia	Tetradonia lizonae	Munetoshi Maruyama	dendrolasius@gmail.com	morphological examination and COI barcode	high confidence in identification
cvb451tetr002	Arthropoda	Insecta	Coleoptera	Staphylinidae	Aleocharinae	Tetradonia	Tetradonia lizonae	Munetoshi Maruyama	dendrolasius@gmail.com	morphological examination and COI barcode	high confidence in identification
cvb451tetr001	Arthropoda	Insecta	Coleoptera	Staphylinidae	Aleocharinae	Tetradonia	Tetradonia lizonae	Munetoshi Maruyama	dendrolasius@gmail.com	morphological examination and COI barcode	high confidence in identification
cvb316tetr003	Arthropoda	Insecta	Coleoptera	Staphylinidae	Aleocharinae	Tetradonia	Tetradonia lizonae	Munetoshi Maruyama	dendrolasius@gmail.com	morphological examination and COI barcode	high confidence in identification
cvb371tetr006	Arthropoda	Insecta	Coleoptera	Staphylinidae	Aleocharinae	Tetradonia	Tetradonia marginalis	Munetoshi Maruyama	dendrolasius@gmail.com	morphological examination and COI barcode	high confidence in identification
cvb249tetr006	Arthropoda	Insecta	Coleoptera	Staphylinidae	Aleocharinae	Tetradonia	Tetradonia marginalis	Munetoshi Maruyama	dendrolasius@gmail.com	morphological examination and COI barcode	high confidence in identification
cvb097tetr005	Arthropoda	Insecta	Coleoptera	Staphylinidae	Aleocharinae	Tetradonia	Tetradonia marginalis	Munetoshi Maruyama	dendrolasius@gmail.com	morphological examination and COI barcode	high confidence in identification
cvb007tetr001	Arthropoda	Insecta	Coleoptera	Staphylinidae	Aleocharinae	Tetradonia	Tetradonia marginalis	Munetoshi Maruyama	dendrolasius@gmail.com	morphological examination and COI barcode	high confidence in identification
cvb451tetr009	Arthropoda	Insecta	Coleoptera	Staphylinidae	Aleocharinae	Tetradonia	Tetradonia marginalis	Munetoshi Maruyama	dendrolasius@gmail.com	morphological examination and COI barcode	high confidence in identification
cvb104tetr009	Arthropoda	Insecta	Coleoptera	Staphylinidae	Aleocharinae	Tetradonia	Tetradonia marginalis	Munetoshi Maruyama	dendrolasius@gmail.com	morphological examination and COI barcode	high confidence in identification
cvb104tetr010	Arthropoda	Insecta	Coleoptera	Staphylinidae	Aleocharinae	Tetradonia	Tetradonia marginalis	Munetoshi Maruyama	dendrolasius@gmail.com	morphological examination and COI barcode	high confidence in identification
cvb097tetr011	Arthropoda	Insecta	Coleoptera	Staphylinidae	Aleocharinae	Tetradonia	Tetradonia marginalis	Munetoshi Maruyama	dendrolasius@gmail.com	morphological examination and COI barcode	high confidence in identification
cvb390tetr003	Arthropoda	Insecta	Coleoptera	Staphylinidae	Aleocharinae	Tetradonia	Tetradonia marginalis	Munetoshi Maruyama	dendrolasius@gmail.com	morphological examination and COI barcode	high confidence in identification
cvb390tetr002	Arthropoda	Insecta	Coleoptera	Staphylinidae	Aleocharinae	Tetradonia	Tetradonia marginalis	Munetoshi Maruyama	dendrolasius@gmail.com	morphological examination and COI barcode	high confidence in identification
cvb390tetr001	Arthropoda	Insecta	Coleoptera	Staphylinidae	Aleocharinae	Tetradonia	Tetradonia marginalis	Munetoshi Maruyama	dendrolasius@gmail.com	morphological examination and COI barcode	high confidence in identification
cvb316tetr002	Arthropoda	Insecta	Coleoptera	Staphylinidae	Aleocharinae	Tetradonia	Tetradonia marginalis	Munetoshi Maruyama	dendrolasius@gmail.com	morphological examination and COI barcode	high confidence in identification
cvb451tetr004	Arthropoda	Insecta	Coleoptera	Staphylinidae	Aleocharinae	Tetradonia	Tetradonia marginalis	Munetoshi Maruyama	dendrolasius@gmail.com	morphological examination and COI barcode	high confidence in identification
cvb316tetr001	Arthropoda	Insecta	Coleoptera	Staphylinidae	Aleocharinae	Tetradonia	Tetradonia marginalis	Munetoshi Maruyama	dendrolasius@gmail.com	morphological examination and COI barcode	high confidence in identification
cvb104tetr011	Arthropoda	Insecta	Coleoptera	Staphylinidae	Aleocharinae	Tetradonia	Tetradonia marginalis	Munetoshi Maruyama	dendrolasius@gmail.com	morphological examination and COI barcode	high confidence in identification
cvb104tetr012	Arthropoda	Insecta	Coleoptera	Staphylinidae	Aleocharinae	Tetradonia	Tetradonia marginalis	Munetoshi Maruyama	dendrolasius@gmail.com	morphological examination and COI barcode	high confidence in identification
cvb038tetr013	Arthropoda	Insecta	Coleoptera	Staphylinidae	Aleocharinae	Tetradonia	Tetradonia marginalis	Munetoshi Maruyama	dendrolasius@gmail.com	morphological examination and COI barcode	high confidence in identification
cvb038tetr003	Arthropoda	Insecta	Coleoptera	Staphylinidae	Aleocharinae	Tetradonia	Tetradonia marginalis	Munetoshi Maruyama	dendrolasius@gmail.com	morphological examination and COI barcode	high confidence in identification
cvb399tetr007	Arthropoda	Insecta	Coleoptera	Staphylinidae	Aleocharinae	Tetradonia	Tetradonia marginalis	Munetoshi Maruyama	dendrolasius@gmail.com	morphological examination and COI barcode	high confidence in identification
cvb399tetr006	Arthropoda	Insecta	Coleoptera	Staphylinidae	Aleocharinae	Tetradonia	Tetradonia marginalis	Munetoshi Maruyama	dendrolasius@gmail.com	morphological examination and COI barcode	high confidence in identification
cvb399tetr005	Arthropoda	Insecta	Coleoptera	Staphylinidae	Aleocharinae	Tetradonia	Tetradonia marginalis	Munetoshi Maruyama	dendrolasius@gmail.com	morphological examination and COI barcode	high confidence in identification
cvb250tetr007	Arthropoda	Insecta	Coleoptera	Staphylinidae	Aleocharinae	Tetradonia	Tetradonia marginalis	Munetoshi Maruyama	dendrolasius@gmail.com	morphological examination and COI barcode	high confidence in identification
cvb382tetr006	Arthropoda	Insecta	Coleoptera	Staphylinidae	Aleocharinae	Tetradonia	Tetradonia marginalis	Munetoshi Maruyama	dendrolasius@gmail.com	morphological examination and COI barcode	high confidence in identification
cvb038tetr002	Arthropoda	Insecta	Coleoptera	Staphylinidae	Aleocharinae	Tetradonia	Tetradonia marginalis	Munetoshi Maruyama	dendrolasius@gmail.com	morphological examination and COI barcode	high confidence in identification
cvb038tetr001	Arthropoda	Insecta	Coleoptera	Staphylinidae	Aleocharinae	Tetradonia	Tetradonia marginalis	Munetoshi Maruyama	dendrolasius@gmail.com	morphological examination and COI barcode	high confidence in identification
cvb015tetr003	Arthropoda	Insecta	Coleoptera	Staphylinidae	Aleocharinae	Tetradonia	Tetradonia marginalis	Munetoshi Maruyama	dendrolasius@gmail.com	morphological examination and COI barcode	high confidence in identification
cvb015tetr002	Arthropoda	Insecta	Coleoptera	Staphylinidae	Aleocharinae	Tetradonia	Tetradonia marginalis	Munetoshi Maruyama	dendrolasius@gmail.com	morphological examination and COI barcode	high confidence in identification
cvb371tetr002	Arthropoda	Insecta	Coleoptera	Staphylinidae	Aleocharinae	Tetradonia	Tetradonia marginalis	Munetoshi Maruyama	dendrolasius@gmail.com	morphological examination and COI barcode	high confidence in identification
cvb371tetr003	Arthropoda	Insecta	Coleoptera	Staphylinidae	Aleocharinae	Tetradonia	Tetradonia marginalis	Munetoshi Maruyama	dendrolasius@gmail.com	morphological examination and COI barcode	high confidence in identification
cvb120tetr001	Arthropoda	Insecta	Coleoptera	Staphylinidae	Aleocharinae	Tetradonia	Tetradonia marginalis	Munetoshi Maruyama	dendrolasius@gmail.com	morphological examination and COI barcode	high confidence in identification
cvb038tetr006	Arthropoda	Insecta	Coleoptera	Staphylinidae	Aleocharinae	Tetradonia	Tetradonia marginalis	Munetoshi Maruyama	dendrolasius@gmail.com	morphological examination and COI barcode	high confidence in identification
cvb038tetr005	Arthropoda	Insecta	Coleoptera	Staphylinidae	Aleocharinae	Tetradonia	Tetradonia marginalis	Munetoshi Maruyama	dendrolasius@gmail.com	morphological examination and COI barcode	high confidence in identification
cvb038tetr004	Arthropoda	Insecta	Coleoptera	Staphylinidae	Aleocharinae	Tetradonia	Tetradonia marginalis	Munetoshi Maruyama	dendrolasius@gmail.com	morphological examination and COI barcode	high confidence in identification
cvb007tetr003	Arthropoda	Insecta	Coleoptera	Staphylinidae	Aleocharinae	Tetradonia	Tetradonia marginalis	Munetoshi Maruyama	dendrolasius@gmail.com	morphological examination and COI barcode	high confidence in identification
cvb007tetr002	Arthropoda	Insecta	Coleoptera	Staphylinidae	Aleocharinae	Tetradonia	Tetradonia marginalis	Munetoshi Maruyama	dendrolasius@gmail.com	morphological examination and COI barcode	high confidence in identification
cvb371tetr007	Arthropoda	Insecta	Coleoptera	Staphylinidae	Aleocharinae	Tetradonia	Tetradonia marginalis	Munetoshi Maruyama	dendrolasius@gmail.com	morphological examination and COI barcode	high confidence in identification
cvb250tetr008	Arthropoda	Insecta	Coleoptera	Staphylinidae	Aleocharinae	Tetradonia	Tetradonia marginalis	Munetoshi Maruyama	dendrolasius@gmail.com	morphological examination and COI barcode	high confidence in identification
cvb250tetr009	Arthropoda	Insecta	Coleoptera	Staphylinidae	Aleocharinae	Tetradonia	Tetradonia marginalis	Munetoshi Maruyama	dendrolasius@gmail.com	morphological examination and COI barcode	high confidence in identification
cvb423tetr001	Arthropoda	Insecta	Coleoptera	Staphylinidae	Aleocharinae	Tetradonia	Tetradonia marginalis	Munetoshi Maruyama	dendrolasius@gmail.com	morphological examination and COI barcode	high confidence in identification
cvb209tetr006	Arthropoda	Insecta	Coleoptera	Staphylinidae	Aleocharinae	Tetradonia	Tetradonia marginalis	Munetoshi Maruyama	dendrolasius@gmail.com	morphological examination and COI barcode	high confidence in identification
cvb308tetr009	Arthropoda	Insecta	Coleoptera	Staphylinidae	Aleocharinae	Tetradonia	Tetradonia marginalis	Munetoshi Maruyama	dendrolasius@gmail.com	morphological examination and COI barcode	high confidence in identification
cvb435tetr001	Arthropoda	Insecta	Coleoptera	Staphylinidae	Aleocharinae	Tetradonia	Tetradonia marginalis	Munetoshi Maruyama	dendrolasius@gmail.com	morphological examination and COI barcode	high confidence in identification
cvb533tetr006	Arthropoda	Insecta	Coleoptera	Staphylinidae	Aleocharinae	Tetradonia	Tetradonia marginalis	Munetoshi Maruyama	dendrolasius@gmail.com	morphological examination and COI barcode	high confidence in identification
cvb571tetr002	Arthropoda	Insecta	Coleoptera	Staphylinidae	Aleocharinae	Tetradonia	Tetradonia marginalis	Munetoshi Maruyama	dendrolasius@gmail.com	morphological examination and COI barcode	high confidence in identification
cvb422tetr003	Arthropoda	Insecta	Coleoptera	Staphylinidae	Aleocharinae	Tetradonia	Tetradonia marginalis	Munetoshi Maruyama	dendrolasius@gmail.com	morphological examination and COI barcode	high confidence in identification
cvb422tetr002	Arthropoda	Insecta	Coleoptera	Staphylinidae	Aleocharinae	Tetradonia	Tetradonia marginalis	Munetoshi Maruyama	dendrolasius@gmail.com	morphological examination and COI barcode	high confidence in identification
cvb422tetr001	Arthropoda	Insecta	Coleoptera	Staphylinidae	Aleocharinae	Tetradonia	Tetradonia marginalis	Munetoshi Maruyama	dendrolasius@gmail.com	morphological examination and COI barcode	high confidence in identification
cvb435tetr002	Arthropoda	Insecta	Coleoptera	Staphylinidae	Aleocharinae	Tetradonia	Tetradonia marginalis	Munetoshi Maruyama	dendrolasius@gmail.com	morphological examination and COI barcode	high confidence in identification
cvb529tetr002	Arthropoda	Insecta	Coleoptera	Staphylinidae	Aleocharinae	Tetradonia	Tetradonia marginalis	Munetoshi Maruyama	dendrolasius@gmail.com	morphological examination and COI barcode	high confidence in identification
cvb572tetr004	Arthropoda	Insecta	Coleoptera	Staphylinidae	Aleocharinae	Tetradonia	Tetradonia marginalis	Munetoshi Maruyama	dendrolasius@gmail.com	morphological examination and COI barcode	high confidence in identification
cvb311tetr001	Arthropoda	Insecta	Coleoptera	Staphylinidae	Aleocharinae	Tetradonia	Tetradonia marginalis	Munetoshi Maruyama	dendrolasius@gmail.com	morphological examination and COI barcode	high confidence in identification
cvb210tetr001	Arthropoda	Insecta	Coleoptera	Staphylinidae	Aleocharinae	Tetradonia	Tetradonia marginalis	Munetoshi Maruyama	dendrolasius@gmail.com	morphological examination and COI barcode	high confidence in identification
cvb249tetr005	Arthropoda	Insecta	Coleoptera	Staphylinidae	Aleocharinae	Tetradonia	Tetradonia marginalis	Munetoshi Maruyama	dendrolasius@gmail.com	morphological examination and COI barcode	high confidence in identification
cvb249tetr004	Arthropoda	Insecta	Coleoptera	Staphylinidae	Aleocharinae	Tetradonia	Tetradonia marginalis	Munetoshi Maruyama	dendrolasius@gmail.com	morphological examination and COI barcode	high confidence in identification
cvb176tetr002	Arthropoda	Insecta	Coleoptera	Staphylinidae	Aleocharinae	Tetradonia	Tetradonia marginalis	Munetoshi Maruyama	dendrolasius@gmail.com	morphological examination and COI barcode	high confidence in identification
cvb371tetr005	Arthropoda	Insecta	Coleoptera	Staphylinidae	Aleocharinae	Tetradonia	Tetradonia marginalis	Munetoshi Maruyama	dendrolasius@gmail.com	morphological examination and COI barcode	high confidence in identification
cvb019tetr002	Arthropoda	Insecta	Coleoptera	Staphylinidae	Aleocharinae	Tetradonia	Tetradonia marginalis	Munetoshi Maruyama	dendrolasius@gmail.com	morphological examination and COI barcode	high confidence in identification
cvb019tetr001	Arthropoda	Insecta	Coleoptera	Staphylinidae	Aleocharinae	Tetradonia	Tetradonia marginalis	Munetoshi Maruyama	dendrolasius@gmail.com	morphological examination and COI barcode	high confidence in identification
cvb006tetr001	Arthropoda	Insecta	Coleoptera	Staphylinidae	Aleocharinae	Tetradonia	Tetradonia marginalis	Munetoshi Maruyama	dendrolasius@gmail.com	morphological examination and COI barcode	high confidence in identification
cvb007tetr004	Arthropoda	Insecta	Coleoptera	Staphylinidae	Aleocharinae	Tetradonia	Tetradonia marginalis	Munetoshi Maruyama	dendrolasius@gmail.com	morphological examination and COI barcode	high confidence in identification
cvb541tetr002	Arthropoda	Insecta	Coleoptera	Staphylinidae	Aleocharinae	Tetradonia	Tetradonia marginalis	Munetoshi Maruyama	dendrolasius@gmail.com	morphological examination and COI barcode	high confidence in identification
cvb541tetr001	Arthropoda	Insecta	Coleoptera	Staphylinidae	Aleocharinae	Tetradonia	Tetradonia marginalis	Munetoshi Maruyama	dendrolasius@gmail.com	morphological examination and COI barcode	high confidence in identification
cvb316tetr006	Arthropoda	Insecta	Coleoptera	Staphylinidae	Aleocharinae	Tetradonia	Tetradonia marginalis	Munetoshi Maruyama	dendrolasius@gmail.com	morphological examination and COI barcode	high confidence in identification
cvb015tetr001	Arthropoda	Insecta	Coleoptera	Staphylinidae	Aleocharinae	Tetradonia	Tetradonia marginalis	Munetoshi Maruyama	dendrolasius@gmail.com	morphological examination and COI barcode	high confidence in identification
cvb410tetr003	Arthropoda	Insecta	Coleoptera	Staphylinidae	Aleocharinae	Tetradonia	Tetradonia marginalis	Munetoshi Maruyama	dendrolasius@gmail.com	morphological examination and COI barcode	high confidence in identification
cvb533tetr005	Arthropoda	Insecta	Coleoptera	Staphylinidae	Aleocharinae	Tetradonia	Tetradonia marginalis	Munetoshi Maruyama	dendrolasius@gmail.com	morphological examination and COI barcode	high confidence in identification
cvb533tetr004	Arthropoda	Insecta	Coleoptera	Staphylinidae	Aleocharinae	Tetradonia	Tetradonia marginalis	Munetoshi Maruyama	dendrolasius@gmail.com	morphological examination and COI barcode	high confidence in identification
cvb533tetr003	Arthropoda	Insecta	Coleoptera	Staphylinidae	Aleocharinae	Tetradonia	Tetradonia marginalis	Munetoshi Maruyama	dendrolasius@gmail.com	morphological examination and COI barcode	high confidence in identification
cvb533tetr002	Arthropoda	Insecta	Coleoptera	Staphylinidae	Aleocharinae	Tetradonia	Tetradonia marginalis	Munetoshi Maruyama	dendrolasius@gmail.com	morphological examination and COI barcode	high confidence in identification
cvb533tetr001	Arthropoda	Insecta	Coleoptera	Staphylinidae	Aleocharinae	Tetradonia	Tetradonia marginalis	Munetoshi Maruyama	dendrolasius@gmail.com	morphological examination and COI barcode	high confidence in identification
cvb541tetr008	Arthropoda	Insecta	Coleoptera	Staphylinidae	Aleocharinae	Tetradonia	Tetradonia marginalis	Munetoshi Maruyama	dendrolasius@gmail.com	morphological examination and COI barcode	high confidence in identification
cvb541tetr009	Arthropoda	Insecta	Coleoptera	Staphylinidae	Aleocharinae	Tetradonia	Tetradonia marginalis	Munetoshi Maruyama	dendrolasius@gmail.com	morphological examination and COI barcode	high confidence in identification
cvb541tetr011	Arthropoda	Insecta	Coleoptera	Staphylinidae	Aleocharinae	Tetradonia	Tetradonia marginalis	Munetoshi Maruyama	dendrolasius@gmail.com	morphological examination and COI barcode	high confidence in identification
cvb398tetr003	Arthropoda	Insecta	Coleoptera	Staphylinidae	Aleocharinae	Tetradonia	Tetradonia marginalis	Munetoshi Maruyama	dendrolasius@gmail.com	morphological examination and COI barcode	high confidence in identification
cvb398tetr002	Arthropoda	Insecta	Coleoptera	Staphylinidae	Aleocharinae	Tetradonia	Tetradonia marginalis	Munetoshi Maruyama	dendrolasius@gmail.com	morphological examination and COI barcode	high confidence in identification
cvb676tetr006	Arthropoda	Insecta	Coleoptera	Staphylinidae	Aleocharinae	Tetradonia	Tetradonia marginalis	Munetoshi Maruyama	dendrolasius@gmail.com	morphological examination and COI barcode	high confidence in identification
cvb676tetr010	Arthropoda	Insecta	Coleoptera	Staphylinidae	Aleocharinae	Tetradonia	Tetradonia marginalis	Munetoshi Maruyama	dendrolasius@gmail.com	morphological examination and COI barcode	high confidence in identification
cvb048tetr008	Arthropoda	Insecta	Coleoptera	Staphylinidae	Aleocharinae	Tetradonia	Tetradonia marginalis	Munetoshi Maruyama	dendrolasius@gmail.com	morphological examination and COI barcode	high confidence in identification
cvb048tetr009	Arthropoda	Insecta	Coleoptera	Staphylinidae	Aleocharinae	Tetradonia	Tetradonia marginalis	Munetoshi Maruyama	dendrolasius@gmail.com	morphological examination and COI barcode	high confidence in identification
cvb048tetr010	Arthropoda	Insecta	Coleoptera	Staphylinidae	Aleocharinae	Tetradonia	Tetradonia marginalis	Munetoshi Maruyama	dendrolasius@gmail.com	morphological examination and COI barcode	high confidence in identification
cvb316tetr008	Arthropoda	Insecta	Coleoptera	Staphylinidae	Aleocharinae	Tetradonia	Tetradonia marginalis	Munetoshi Maruyama	dendrolasius@gmail.com	morphological examination and COI barcode	high confidence in identification
cvb316tetr011	Arthropoda	Insecta	Coleoptera	Staphylinidae	Aleocharinae	Tetradonia	Tetradonia marginalis	Munetoshi Maruyama	dendrolasius@gmail.com	morphological examination and COI barcode	high confidence in identification
cvb433tetr007	Arthropoda	Insecta	Coleoptera	Staphylinidae	Aleocharinae	Tetradonia	Tetradonia marginalis	Munetoshi Maruyama	dendrolasius@gmail.com	morphological examination and COI barcode	high confidence in identification
cvb433tetr008	Arthropoda	Insecta	Coleoptera	Staphylinidae	Aleocharinae	Tetradonia	Tetradonia marginalis	Munetoshi Maruyama	dendrolasius@gmail.com	morphological examination and COI barcode	high confidence in identification
cvb433tetr010	Arthropoda	Insecta	Coleoptera	Staphylinidae	Aleocharinae	Tetradonia	Tetradonia marginalis	Munetoshi Maruyama	dendrolasius@gmail.com	morphological examination and COI barcode	high confidence in identification
cvb410tetr002	Arthropoda	Insecta	Coleoptera	Staphylinidae	Aleocharinae	Tetradonia	Tetradonia marginalis	Munetoshi Maruyama	dendrolasius@gmail.com	morphological examination and COI barcode	high confidence in identification
cvb399tetr001	Arthropoda	Insecta	Coleoptera	Staphylinidae	Aleocharinae	Tetradonia	Tetradonia marginalis	Munetoshi Maruyama	dendrolasius@gmail.com	morphological examination and COI barcode	high confidence in identification
cvb410tetr001	Arthropoda	Insecta	Coleoptera	Staphylinidae	Aleocharinae	Tetradonia	Tetradonia marginalis	Munetoshi Maruyama	dendrolasius@gmail.com	morphological examination and COI barcode	high confidence in identification
cvb038tetr015	Arthropoda	Insecta	Coleoptera	Staphylinidae	Aleocharinae	Tetradonia	Tetradonia marginalis	Munetoshi Maruyama	dendrolasius@gmail.com	morphological examination and COI barcode	high confidence in identification
cvb382tetr001	Arthropoda	Insecta	Coleoptera	Staphylinidae	Aleocharinae	Tetradonia	Tetradonia marginalis	Munetoshi Maruyama	dendrolasius@gmail.com	morphological examination and COI barcode	high confidence in identification
cvb038tetr016	Arthropoda	Insecta	Coleoptera	Staphylinidae	Aleocharinae	Tetradonia	Tetradonia marginalis	Munetoshi Maruyama	dendrolasius@gmail.com	morphological examination and COI barcode	high confidence in identification
cvb097tetr010	Arthropoda	Insecta	Coleoptera	Staphylinidae	Aleocharinae	Tetradonia	Tetradonia marginalis	Munetoshi Maruyama	dendrolasius@gmail.com	morphological examination and COI barcode	high confidence in identification
cvb433tetr011	Arthropoda	Insecta	Coleoptera	Staphylinidae	Aleocharinae	Tetradonia	Tetradonia marginalis	Munetoshi Maruyama	dendrolasius@gmail.com	morphological examination and COI barcode	high confidence in identification
cvb097tetr003	Arthropoda	Insecta	Coleoptera	Staphylinidae	Aleocharinae	Tetradonia	Tetradonia marginalis	Munetoshi Maruyama	dendrolasius@gmail.com	morphological examination and COI barcode	high confidence in identification
cvb097tetr002	Arthropoda	Insecta	Coleoptera	Staphylinidae	Aleocharinae	Tetradonia	Tetradonia marginalis	Munetoshi Maruyama	dendrolasius@gmail.com	morphological examination and COI barcode	high confidence in identification
cvb097tetr001	Arthropoda	Insecta	Coleoptera	Staphylinidae	Aleocharinae	Tetradonia	Tetradonia marginalis	Munetoshi Maruyama	dendrolasius@gmail.com	morphological examination and COI barcode	high confidence in identification
cvb104tetr004	Arthropoda	Insecta	Coleoptera	Staphylinidae	Aleocharinae	Tetradonia	Tetradonia marginalis	Munetoshi Maruyama	dendrolasius@gmail.com	morphological examination and COI barcode	high confidence in identification
cvb104tetr003	Arthropoda	Insecta	Coleoptera	Staphylinidae	Aleocharinae	Tetradonia	Tetradonia marginalis	Munetoshi Maruyama	dendrolasius@gmail.com	morphological examination and COI barcode	high confidence in identification
cvb104tetr002	Arthropoda	Insecta	Coleoptera	Staphylinidae	Aleocharinae	Tetradonia	Tetradonia marginalis	Munetoshi Maruyama	dendrolasius@gmail.com	morphological examination and COI barcode	high confidence in identification
cvb451tetr008	Arthropoda	Insecta	Coleoptera	Staphylinidae	Aleocharinae	Tetradonia	Tetradonia marginalis	Munetoshi Maruyama	dendrolasius@gmail.com	morphological examination and COI barcode	high confidence in identification
cvb571tetr001	Arthropoda	Insecta	Coleoptera	Staphylinidae	Aleocharinae	Tetradonia	Tetradonia marginalis	Munetoshi Maruyama	dendrolasius@gmail.com	morphological examination and COI barcode	high confidence in identification
cvb320tetr003	Arthropoda	Insecta	Coleoptera	Staphylinidae	Aleocharinae	Tetradonia	Tetradonia marginalis	Munetoshi Maruyama	dendrolasius@gmail.com	morphological examination and COI barcode	high confidence in identification
cvb320tetr002	Arthropoda	Insecta	Coleoptera	Staphylinidae	Aleocharinae	Tetradonia	Tetradonia marginalis	Munetoshi Maruyama	dendrolasius@gmail.com	morphological examination and COI barcode	high confidence in identification
cvb320tetr001	Arthropoda	Insecta	Coleoptera	Staphylinidae	Aleocharinae	Tetradonia	Tetradonia marginalis	Munetoshi Maruyama	dendrolasius@gmail.com	morphological examination and COI barcode	high confidence in identification
cvb249tetr003	Arthropoda	Insecta	Coleoptera	Staphylinidae	Aleocharinae	Tetradonia	Tetradonia marginalis	Munetoshi Maruyama	dendrolasius@gmail.com	morphological examination and COI barcode	high confidence in identification
cvb249tetr002	Arthropoda	Insecta	Coleoptera	Staphylinidae	Aleocharinae	Tetradonia	Tetradonia marginalis	Munetoshi Maruyama	dendrolasius@gmail.com	morphological examination and COI barcode	high confidence in identification
cvb249tetr001	Arthropoda	Insecta	Coleoptera	Staphylinidae	Aleocharinae	Tetradonia	Tetradonia marginalis	Munetoshi Maruyama	dendrolasius@gmail.com	morphological examination and COI barcode	high confidence in identification
cvb705tetr001	Arthropoda	Insecta	Coleoptera	Staphylinidae	Aleocharinae	Tetradonia	Tetradonia marginalis	Munetoshi Maruyama	dendrolasius@gmail.com	morphological examination and COI barcode	high confidence in identification
cvb705tetr002	Arthropoda	Insecta	Coleoptera	Staphylinidae	Aleocharinae	Tetradonia	Tetradonia marginalis	Munetoshi Maruyama	dendrolasius@gmail.com	morphological examination and COI barcode	high confidence in identification
cvb513tetr003	Arthropoda	Insecta	Coleoptera	Staphylinidae	Aleocharinae	Tetradonia	Tetradonia marginalis	Munetoshi Maruyama	dendrolasius@gmail.com	morphological examination and COI barcode	high confidence in identification
cvb713tetr001	Arthropoda	Insecta	Coleoptera	Staphylinidae	Aleocharinae	Tetradonia	Tetradonia marginalis	Munetoshi Maruyama	dendrolasius@gmail.com	morphological examination and COI barcode	high confidence in identification
cvb713tetr002	Arthropoda	Insecta	Coleoptera	Staphylinidae	Aleocharinae	Tetradonia	Tetradonia marginalis	Munetoshi Maruyama	dendrolasius@gmail.com	morphological examination and COI barcode	high confidence in identification
cvb048tetr001	Arthropoda	Insecta	Coleoptera	Staphylinidae	Aleocharinae	Tetradonia	Tetradonia marginalis	Munetoshi Maruyama	dendrolasius@gmail.com	morphological examination and COI barcode	high confidence in identification
cvb716tetr001	Arthropoda	Insecta	Coleoptera	Staphylinidae	Aleocharinae	Tetradonia	Tetradonia marginalis	Munetoshi Maruyama	dendrolasius@gmail.com	morphological examination and COI barcode	high confidence in identification
cvb716tetr002	Arthropoda	Insecta	Coleoptera	Staphylinidae	Aleocharinae	Tetradonia	Tetradonia marginalis	Munetoshi Maruyama	dendrolasius@gmail.com	morphological examination and COI barcode	high confidence in identification
cvb713tetr003	Arthropoda	Insecta	Coleoptera	Staphylinidae	Aleocharinae	Tetradonia	Tetradonia marginalis	Munetoshi Maruyama	dendrolasius@gmail.com	morphological examination and COI barcode	high confidence in identification
cvb713tetr004	Arthropoda	Insecta	Coleoptera	Staphylinidae	Aleocharinae	Tetradonia	Tetradonia marginalis	Munetoshi Maruyama	dendrolasius@gmail.com	morphological examination and COI barcode	high confidence in identification
cvb410tetr004	Arthropoda	Insecta	Coleoptera	Staphylinidae	Aleocharinae	Tetradonia	Tetradonia marginalis	Munetoshi Maruyama	dendrolasius@gmail.com	morphological examination and COI barcode	high confidence in identification
cvb499tetr002	Arthropoda	Insecta	Coleoptera	Staphylinidae	Aleocharinae	Tetradonia	Tetradonia marginalis	Munetoshi Maruyama	dendrolasius@gmail.com	morphological examination and COI barcode	high confidence in identification
cvb100tetr006	Arthropoda	Insecta	Coleoptera	Staphylinidae	Aleocharinae	Tetradonia	Tetradonia marginalis	Munetoshi Maruyama	dendrolasius@gmail.com	morphological examination and COI barcode	high confidence in identification
cvb038tetr007	Arthropoda	Insecta	Coleoptera	Staphylinidae	Aleocharinae	Tetradonia	Tetradonia marginalis	Munetoshi Maruyama	dendrolasius@gmail.com	morphological examination and COI barcode	high confidence in identification
cvb038tetr008	Arthropoda	Insecta	Coleoptera	Staphylinidae	Aleocharinae	Tetradonia	Tetradonia marginalis	Munetoshi Maruyama	dendrolasius@gmail.com	morphological examination and COI barcode	high confidence in identification
cvb038tetr009	Arthropoda	Insecta	Coleoptera	Staphylinidae	Aleocharinae	Tetradonia	Tetradonia marginalis	Munetoshi Maruyama	dendrolasius@gmail.com	morphological examination and COI barcode	high confidence in identification
cvb038tetr011	Arthropoda	Insecta	Coleoptera	Staphylinidae	Aleocharinae	Tetradonia	Tetradonia marginalis	Munetoshi Maruyama	dendrolasius@gmail.com	morphological examination and COI barcode	high confidence in identification
cvb015tetr006	Arthropoda	Insecta	Coleoptera	Staphylinidae	Aleocharinae	Tetradonia	Tetradonia marginalis	Munetoshi Maruyama	dendrolasius@gmail.com	morphological examination and COI barcode	high confidence in identification
cvb015tetr007	Arthropoda	Insecta	Coleoptera	Staphylinidae	Aleocharinae	Tetradonia	Tetradonia marginalis	Munetoshi Maruyama	dendrolasius@gmail.com	morphological examination and COI barcode	high confidence in identification
cvb015tetr008	Arthropoda	Insecta	Coleoptera	Staphylinidae	Aleocharinae	Tetradonia	Tetradonia marginalis	Munetoshi Maruyama	dendrolasius@gmail.com	morphological examination and COI barcode	high confidence in identification
cvb213tetr001	Arthropoda	Insecta	Coleoptera	Staphylinidae	Aleocharinae	Tetradonia	Tetradonia marginalis	Munetoshi Maruyama	dendrolasius@gmail.com	morphological examination and COI barcode	high confidence in identification
cvb209tetr001	Arthropoda	Insecta	Coleoptera	Staphylinidae	Aleocharinae	Tetradonia	Tetradonia marginalis	Munetoshi Maruyama	dendrolasius@gmail.com	morphological examination and COI barcode	high confidence in identification
cvb371tetr001	Arthropoda	Insecta	Coleoptera	Staphylinidae	Aleocharinae	Tetradonia	Tetradonia marginalis	Munetoshi Maruyama	dendrolasius@gmail.com	morphological examination and COI barcode	high confidence in identification
cvb689tetr001	Arthropoda	Insecta	Coleoptera	Staphylinidae	Aleocharinae	Tetradonia	Tetradonia marginalis	Munetoshi Maruyama	dendrolasius@gmail.com	morphological examination and COI barcode	high confidence in identification
cvb158tetr003	Arthropoda	Insecta	Coleoptera	Staphylinidae	Aleocharinae	Tetradonia	Tetradonia marginalis	Munetoshi Maruyama	dendrolasius@gmail.com	morphological examination and COI barcode	high confidence in identification
cvb676tetr004	Arthropoda	Insecta	Coleoptera	Staphylinidae	Aleocharinae	Tetradonia	Tetradonia marginalis	Munetoshi Maruyama	dendrolasius@gmail.com	morphological examination and COI barcode	high confidence in identification
cvb158tetr002	Arthropoda	Insecta	Coleoptera	Staphylinidae	Aleocharinae	Tetradonia	Tetradonia marginalis	Munetoshi Maruyama	dendrolasius@gmail.com	morphological examination and COI barcode	high confidence in identification
cvb158tetr001	Arthropoda	Insecta	Coleoptera	Staphylinidae	Aleocharinae	Tetradonia	Tetradonia marginalis	Munetoshi Maruyama	dendrolasius@gmail.com	morphological examination and COI barcode	high confidence in identification
cvb676tetr001	Arthropoda	Insecta	Coleoptera	Staphylinidae	Aleocharinae	Tetradonia	Tetradonia marginalis	Munetoshi Maruyama	dendrolasius@gmail.com	morphological examination and COI barcode	high confidence in identification
cvb606tetr005	Arthropoda	Insecta	Coleoptera	Staphylinidae	Aleocharinae	Tetradonia	Tetradonia marginalis	Munetoshi Maruyama	dendrolasius@gmail.com	morphological examination and COI barcode	high confidence in identification
cvb371tetr004	Arthropoda	Insecta	Coleoptera	Staphylinidae	Aleocharinae	Tetradonia	Tetradonia marginalis	Munetoshi Maruyama	dendrolasius@gmail.com	morphological examination and COI barcode	high confidence in identification
cvb010tetr004	Arthropoda	Insecta	Coleoptera	Staphylinidae	Aleocharinae	Tetradonia	Tetradonia tikalensis	Munetoshi Maruyama	dendrolasius@gmail.com	morphological examination and COI barcode	high confidence in identification
cvb104tetr008	Arthropoda	Insecta	Coleoptera	Staphylinidae	Aleocharinae	Tetradonia	Tetradonia tikalensis	Munetoshi Maruyama	dendrolasius@gmail.com	morphological examination and COI barcode	high confidence in identification
cvb399tetr003	Arthropoda	Insecta	Coleoptera	Staphylinidae	Aleocharinae	Tetradonia	Tetradonia tikalensis	Munetoshi Maruyama	dendrolasius@gmail.com	morphological examination and COI barcode	high confidence in identification
cvb572tetr005	Arthropoda	Insecta	Coleoptera	Staphylinidae	Aleocharinae	Tetradonia	Tetradonia tikalensis	Munetoshi Maruyama	dendrolasius@gmail.com	morphological examination and COI barcode	high confidence in identification
cvb572tetr008	Arthropoda	Insecta	Coleoptera	Staphylinidae	Aleocharinae	Tetradonia	Tetradonia tikalensis	Munetoshi Maruyama	dendrolasius@gmail.com	morphological examination and COI barcode	high confidence in identification
cvb572tetr007	Arthropoda	Insecta	Coleoptera	Staphylinidae	Aleocharinae	Tetradonia	Tetradonia tikalensis	Munetoshi Maruyama	dendrolasius@gmail.com	morphological examination and COI barcode	high confidence in identification
cvb004tetr001	Arthropoda	Insecta	Coleoptera	Staphylinidae	Aleocharinae	Tetradonia	Tetradonia tikalensis	Munetoshi Maruyama	dendrolasius@gmail.com	morphological examination and COI barcode	high confidence in identification
cvb048tetr006	Arthropoda	Insecta	Coleoptera	Staphylinidae	Aleocharinae	Tetradonia	Tetradonia tikalensis	Munetoshi Maruyama	dendrolasius@gmail.com	morphological examination and COI barcode	high confidence in identification
cvb399tetr008	Arthropoda	Insecta	Coleoptera	Staphylinidae	Aleocharinae	Tetradonia	Tetradonia tikalensis	Munetoshi Maruyama	dendrolasius@gmail.com	morphological examination and COI barcode	high confidence in identification

## Sheet: Collection Data
Sample ID	Collectors	Collection Date	Country/Ocean	State/Province	Region	Exact Site	Lat	Lon	Event Time	Habitat	Sampling Protocol	Site Code
cvb119ecbi003	Christoph von Beeren, Daniel Kronauer, Sebastian Pohl, Griffin Burke	25-Feb-2013	Costa Rica	Heredia	Canton Sarapiqui	La Selva Biological Station	10.423	-84.022	15:30-16:30	Tropical rainforest	collected during host colony raid	SSO150
cvb529tetr005	Christoph von Beeren, Daniel Kronauer, Sebastian Pohl, Griffin Burke	06-Apr-2013	Costa Rica	Heredia	Canton Sarapiqui	La Selva Biological Station	10.423	-84.022	15:45-16:45	Tropical rainforest	collected during host colony raid	SURA50
cvb308tetr008	Christoph von Beeren, Daniel Kronauer, Sebastian Pohl, Griffin Burke	16-Mar-2013	Costa Rica	Heredia	Canton Sarapiqui	La Selva Biological Station	10.423	-84.022	20:30-0:30	Tropical rainforest	collected during host colony emigration	STR1050
cvb308tetr007	Christoph von Beeren, Daniel Kronauer, Sebastian Pohl, Griffin Burke	16-Mar-2013	Costa Rica	Heredia	Canton Sarapiqui	La Selva Biological Station	10.423	-84.022	20:30-0:30	Tropical rainforest	collected during host colony emigration	STR1050
cvb308tetr006	Christoph von Beeren, Daniel Kronauer, Sebastian Pohl, Griffin Burke	16-Mar-2013	Costa Rica	Heredia	Canton Sarapiqui	La Selva Biological Station	10.423	-84.022	20:30-0:30	Tropical rainforest	collected during host colony emigration	STR1050
cvb541tetr003	Christoph von Beeren, Daniel Kronauer, Sebastian Pohl, Griffin Burke	07-Apr-2013	Costa Rica	Heredia	Canton Sarapiqui	La Selva Biological Station	10.423	-84.022	17:00-20:00	Tropical rainforest	collected during host colony emigration	SURA550
cvb176tetr001	Christoph von Beeren, Daniel Kronauer, Sebastian Pohl, Griffin Burke	03-Mar-2013	Costa Rica	Heredia	Canton Sarapiqui	La Selva Biological Station	10.423	-84.022	19-04-2016	Tropical rainforest	collected during host colony raid	cabina 5
cvb572tetr006	Christoph von Beeren, Daniel Kronauer, Sebastian Pohl, Griffin Burke	08-Apr-2013	Costa Rica	Heredia	Canton Sarapiqui	La Selva Biological Station	10.423	-84.022	16:30-23:15	Tropical rainforest	collected during host colony emigration	at station
cvb176tetr003	Christoph von Beeren, Daniel Kronauer, Sebastian Pohl, Griffin Burke	03-Mar-2013	Costa Rica	Heredia	Canton Sarapiqui	La Selva Biological Station	10.423	-84.022	19-04-2016	Tropical rainforest	collected during host colony raid	cabina 5
cvb541tetr007	Christoph von Beeren, Daniel Kronauer, Sebastian Pohl, Griffin Burke	21-Mar-2013	Costa Rica	Heredia	Canton Sarapiqui	La Selva Biological Station	10.423	-84.022	17:00-19:30	Tropical rainforest	collected during host colony emigration	STR750
cvb399tetr004	Christoph von Beeren, Daniel Kronauer, Sebastian Pohl, Griffin Burke	21-Mar-2013	Costa Rica	Heredia	Canton Sarapiqui	La Selva Biological Station	10.423	-84.022	17:00-19:30	Tropical rainforest	collected during host colony emigration	STR750
cvb104tetr005	Christoph von Beeren, Daniel Kronauer, Sebastian Pohl, Griffin Burke	21-Feb-2013	Costa Rica	Heredia	Canton Sarapiqui	La Selva Biological Station	10.423	-84.022	17:30-18:30; 19:30-20:30	Tropical rainforest	collected during host colony emigration	track to estacion del rio
cvb529tetr001	Christoph von Beeren, Daniel Kronauer, Sebastian Pohl, Griffin Burke	06-Apr-2013	Costa Rica	Heredia	Canton Sarapiqui	La Selva Biological Station	10.423	-84.022	15:45-16:45	Tropical rainforest	collected during host colony raid	SURA50
cvb529tetr003	Christoph von Beeren, Daniel Kronauer, Sebastian Pohl, Griffin Burke	06-Apr-2013	Costa Rica	Heredia	Canton Sarapiqui	La Selva Biological Station	10.423	-84.022	15:45-16:45	Tropical rainforest	collected during host colony raid	SURA50
cvb104tetr001	Christoph von Beeren, Daniel Kronauer, Sebastian Pohl, Griffin Burke	21-Feb-2013	Costa Rica	Heredia	Canton Sarapiqui	La Selva Biological Station	10.423	-84.022	17:30-18:30; 19:30-20:30	Tropical rainforest	collected during host colony emigration	track to estacion del rio
cvb606tetr003	Christoph von Beeren, Daniel Kronauer, Sebastian Pohl, Griffin Burke	23-Mar-2014	Costa Rica	Heredia	Canton Sarapiqui	La Selva Biological Station	10.423	-84.022	19:00-22:00	Tropical rainforest	collected during host colony emigration	Suax
cvb692tetr003	Christoph von Beeren, Daniel Kronauer, Sebastian Pohl, Griffin Burke	04-May-2014	Costa Rica	Heredia	Canton Sarapiqui	La Selva Biological Station	10.423	-84.022	20:45-23:45	Tropical rainforest	collected during host colony emigration	CEN
cvb692tetr002	Christoph von Beeren, Daniel Kronauer, Sebastian Pohl, Griffin Burke	04-May-2014	Costa Rica	Heredia	Canton Sarapiqui	La Selva Biological Station	10.423	-84.022	20:45-23:45	Tropical rainforest	collected during host colony emigration	CEN
cvb692tetr001	Christoph von Beeren, Daniel Kronauer, Sebastian Pohl, Griffin Burke	04-May-2014	Costa Rica	Heredia	Canton Sarapiqui	La Selva Biological Station	10.423	-84.022	20:45-23:45	Tropical rainforest	collected during host colony emigration	CEN
cvb591tetr005	Christoph von Beeren, Daniel Kronauer, Sebastian Pohl, Griffin Burke	19-Mar-2014	Costa Rica	Heredia	Canton Sarapiqui	La Selva Biological Station	10.423	-84.022	24:00-03:00	Tropical rainforest	collected during host colony emigration	STR100
cvb591tetr004	Christoph von Beeren, Daniel Kronauer, Sebastian Pohl, Griffin Burke	19-Mar-2014	Costa Rica	Heredia	Canton Sarapiqui	La Selva Biological Station	10.423	-84.022	24:00-03:00	Tropical rainforest	collected during host colony emigration	STR100
cvb591tetr003	Christoph von Beeren, Daniel Kronauer, Sebastian Pohl, Griffin Burke	19-Mar-2014	Costa Rica	Heredia	Canton Sarapiqui	La Selva Biological Station	10.423	-84.022	24:00-03:00	Tropical rainforest	collected during host colony emigration	STR100
cvb591tetr002	Christoph von Beeren, Daniel Kronauer, Sebastian Pohl, Griffin Burke	19-Mar-2014	Costa Rica	Heredia	Canton Sarapiqui	La Selva Biological Station	10.423	-84.022	24:00-03:00	Tropical rainforest	collected during host colony emigration	STR100
cvb591tetr001	Christoph von Beeren, Daniel Kronauer, Sebastian Pohl, Griffin Burke	19-Mar-2014	Costa Rica	Heredia	Canton Sarapiqui	La Selva Biological Station	10.423	-84.022	24:00-03:00	Tropical rainforest	collected during host colony emigration	STR100
cvb718tetr004	Christoph von Beeren, Daniel Kronauer, Sebastian Pohl, Griffin Burke	14-Apr-2014	Costa Rica	Heredia	Canton Sarapiqui	La Selva Biological Station	10.423	-84.022	22:00-00:15	Tropical rainforest	collected during host colony emigration	CES
cvb718tetr005	Christoph von Beeren, Daniel Kronauer, Sebastian Pohl, Griffin Burke	14-Apr-2014	Costa Rica	Heredia	Canton Sarapiqui	La Selva Biological Station	10.423	-84.022	22:00-00:15	Tropical rainforest	collected during host colony emigration	CES
cvb718sta001	Christoph von Beeren, Daniel Kronauer, Sebastian Pohl, Griffin Burke	14-Apr-2014	Costa Rica	Heredia	Canton Sarapiqui	La Selva Biological Station	10.423	-84.022	22:00-00:15	Tropical rainforest	collected during host colony emigration	CES
cvb591tetr011	Christoph von Beeren, Daniel Kronauer, Sebastian Pohl, Griffin Burke	19-Mar-2014	Costa Rica	Heredia	Canton Sarapiqui	La Selva Biological Station	10.423	-84.022	24:00-03:00	Tropical rainforest	collected during host colony emigration	STR100
cvb271tetr002	Christoph von Beeren, Daniel Kronauer, Sebastian Pohl, Griffin Burke	12-Mar-2013	Costa Rica	Heredia	Canton Sarapiqui	La Selva Biological Station	10.423	-84.022	19-04-2016	Tropical rainforest	collected during host colony emigration	CES500
cvb098tetr001	Christoph von Beeren, Daniel Kronauer, Sebastian Pohl, Griffin Burke	19-Feb-2013	Costa Rica	Heredia	Canton Sarapiqui	La Selva Biological Station	10.423	-84.022		Tropical rainforest	collected during host colony emigration	CCC300
cvb095tetr001	Christoph von Beeren, Daniel Kronauer, Sebastian Pohl, Griffin Burke	18-Feb-2013	Costa Rica	Heredia	Canton Sarapiqui	La Selva Biological Station	10.423	-84.022	20:00-3:00	Tropical rainforest	collected during host colony emigration	CCC300
cvb730tetr011	Christoph von Beeren, Daniel Kronauer, Sebastian Pohl, Griffin Burke	18-Apr-2014	Costa Rica	Heredia	Canton Sarapiqui	La Selva Biological Station	10.423	-84.022	20:30-24:00	Tropical rainforest	collected during host colony emigration	CEN 450
cvb002tetr001	Christoph von Beeren, Daniel Kronauer, Sebastian Pohl, Griffin Burke	07-Feb-2013	Costa Rica	Heredia	Canton Sarapiqui	La Selva Biological Station	10.423	-84.022		Tropical rainforest	collected during host colony emigration	CCC1050
cvb095tetr002	Christoph von Beeren, Daniel Kronauer, Sebastian Pohl, Griffin Burke	18-Feb-2013	Costa Rica	Heredia	Canton Sarapiqui	La Selva Biological Station	10.423	-84.022	20:00-3:00	Tropical rainforest	collected during host colony emigration	CCC300
cvb095tetr003	Christoph von Beeren, Daniel Kronauer, Sebastian Pohl, Griffin Burke	18-Feb-2013	Costa Rica	Heredia	Canton Sarapiqui	La Selva Biological Station	10.423	-84.022	20:00-3:00	Tropical rainforest	collected during host colony emigration	CCC300
cvb095tetr004	Christoph von Beeren, Daniel Kronauer, Sebastian Pohl, Griffin Burke	18-Feb-2013	Costa Rica	Heredia	Canton Sarapiqui	La Selva Biological Station	10.423	-84.022	20:00-3:00	Tropical rainforest	collected during host colony emigration	CCC300
cvb193tetr001	Christoph von Beeren, Daniel Kronauer, Sebastian Pohl, Griffin Burke	04-Mar-2013	Costa Rica	Heredia	Canton Sarapiqui	La Selva Biological Station	10.423	-84.022	23:00-4:00	Tropical rainforest	collected during host colony emigration	CES750
cvb048tetr007	Christoph von Beeren, Daniel Kronauer, Sebastian Pohl, Griffin Burke	14-Feb-2013	Costa Rica	Heredia	Canton Sarapiqui	La Selva Biological Station	10.423	-84.022	23:00-5:00	Tropical rainforest	collected during host colony emigration	Trap to River Station
cvb193tetr002	Christoph von Beeren, Daniel Kronauer, Sebastian Pohl, Griffin Burke	04-Mar-2013	Costa Rica	Heredia	Canton Sarapiqui	La Selva Biological Station	10.423	-84.022	23:00-4:00	Tropical rainforest	collected during host colony emigration	CES750
cvb002tetr002	Christoph von Beeren, Daniel Kronauer, Sebastian Pohl, Griffin Burke	07-Feb-2013	Costa Rica	Heredia	Canton Sarapiqui	La Selva Biological Station	10.423	-84.022		Tropical rainforest	collected during host colony emigration	CCC1050
cvb701tetr015	Christoph von Beeren, Daniel Kronauer, Sebastian Pohl, Griffin Burke	07-Apr-2014	Costa Rica	Heredia	Canton Sarapiqui	La Selva Biological Station	10.423	-84.022	19-04-2016	Tropical rainforest	collected during host colony emigration	Ende CCC
cvb094tetr001	Christoph von Beeren, Daniel Kronauer, Sebastian Pohl, Griffin Burke	18-Feb-2013	Costa Rica	Heredia	Canton Sarapiqui	La Selva Biological Station	10.423	-84.022	20:00-3:00	Tropical rainforest	collected during host colony emigration	CCC300
cvb002tetr003	Christoph von Beeren, Daniel Kronauer, Sebastian Pohl, Griffin Burke	07-Feb-2013	Costa Rica	Heredia	Canton Sarapiqui	La Selva Biological Station	10.423	-84.022		Tropical rainforest	collected during host colony emigration	CCC1050
cvb194tetr001	Christoph von Beeren, Daniel Kronauer, Sebastian Pohl, Griffin Burke	04-Mar-2013	Costa Rica	Heredia	Canton Sarapiqui	La Selva Biological Station	10.423	-84.022	19-04-2016	Tropical rainforest	collected during host colony emigration	STR650
cvb106st004	Christoph von Beeren, Daniel Kronauer, Sebastian Pohl, Griffin Burke	21-Feb-2013	Costa Rica	Heredia	Canton Sarapiqui	La Selva Biological Station	10.423	-84.022		Tropical rainforest	collected during host colony emigration	CCC
cvb178tetr001	Christoph von Beeren, Daniel Kronauer, Sebastian Pohl, Griffin Burke	03-Mar-2013	Costa Rica	Heredia	Canton Sarapiqui	La Selva Biological Station	10.423	-84.022	19-04-2016	Tropical rainforest	collected during host colony emigration	CCE500
cvb730tetr010	Christoph von Beeren, Daniel Kronauer, Sebastian Pohl, Griffin Burke	18-Apr-2014	Costa Rica	Heredia	Canton Sarapiqui	La Selva Biological Station	10.423	-84.022	20:30-24:00	Tropical rainforest	collected during host colony emigration	CEN 450
cvb178tetr002	Christoph von Beeren, Daniel Kronauer, Sebastian Pohl, Griffin Burke	03-Mar-2013	Costa Rica	Heredia	Canton Sarapiqui	La Selva Biological Station	10.423	-84.022	19-04-2016	Tropical rainforest	collected during host colony emigration	CCE500
cvb193tetr003	Christoph von Beeren, Daniel Kronauer, Sebastian Pohl, Griffin Burke	04-Mar-2013	Costa Rica	Heredia	Canton Sarapiqui	La Selva Biological Station	10.423	-84.022	23:00-4:00	Tropical rainforest	collected during host colony emigration	CES750
cvb676tetr009	Christoph von Beeren, Daniel Kronauer, Sebastian Pohl, Griffin Burke	31-Mar-2014	Costa Rica	Heredia	Canton Sarapiqui	La Selva Biological Station	10.423	-84.022	20:15-22:10	Tropical rainforest	collected during host colony emigration	CEN
cvb178tetr003	Christoph von Beeren, Daniel Kronauer, Sebastian Pohl, Griffin Burke	03-Mar-2013	Costa Rica	Heredia	Canton Sarapiqui	La Selva Biological Station	10.423	-84.022	19-04-2016	Tropical rainforest	collected during host colony emigration	CCE500
cvb537tetr001	Christoph von Beeren, Daniel Kronauer, Sebastian Pohl, Griffin Burke	06-Apr-2013	Costa Rica	Heredia	Canton Sarapiqui	La Selva Biological Station	10.423	-84.022	22:00-1:00	Tropical rainforest	collected during host colony emigration	CES100
cvb398tetr001	Christoph von Beeren, Daniel Kronauer, Sebastian Pohl, Griffin Burke	21-Mar-2013	Costa Rica	Heredia	Canton Sarapiqui	La Selva Biological Station	10.423	-84.022	23:00-0:30	Tropical rainforest	collected during host colony emigration	CCL550
cvb537tetr002	Christoph von Beeren, Daniel Kronauer, Sebastian Pohl, Griffin Burke	06-Apr-2013	Costa Rica	Heredia	Canton Sarapiqui	La Selva Biological Station	10.423	-84.022	22:00-1:00	Tropical rainforest	collected during host colony emigration	CES100
cvb106st003	Christoph von Beeren, Daniel Kronauer, Sebastian Pohl, Griffin Burke	21-Feb-2013	Costa Rica	Heredia	Canton Sarapiqui	La Selva Biological Station	10.423	-84.022		Tropical rainforest	collected during host colony emigration	CCC
cvb537tetr003	Christoph von Beeren, Daniel Kronauer, Sebastian Pohl, Griffin Burke	06-Apr-2013	Costa Rica	Heredia	Canton Sarapiqui	La Selva Biological Station	10.423	-84.022	22:00-1:00	Tropical rainforest	collected during host colony emigration	CES100
cvb106st002	Christoph von Beeren, Daniel Kronauer, Sebastian Pohl, Griffin Burke	21-Feb-2013	Costa Rica	Heredia	Canton Sarapiqui	La Selva Biological Station	10.423	-84.022		Tropical rainforest	collected during host colony emigration	CCC
cvb049tetr001	Christoph von Beeren, Daniel Kronauer, Sebastian Pohl, Griffin Burke	14-Feb-2013	Costa Rica	Heredia	Canton Sarapiqui	La Selva Biological Station	10.423	-84.022		Tropical rainforest	collected during host colony raid	ccc200
cvb106st001	Christoph von Beeren, Daniel Kronauer, Sebastian Pohl, Griffin Burke	21-Feb-2013	Costa Rica	Heredia	Canton Sarapiqui	La Selva Biological Station	10.423	-84.022		Tropical rainforest	collected during host colony emigration	CCC
cvb049tetr002	Christoph von Beeren, Daniel Kronauer, Sebastian Pohl, Griffin Burke	14-Feb-2013	Costa Rica	Heredia	Canton Sarapiqui	La Selva Biological Station	10.423	-84.022		Tropical rainforest	collected during host colony raid	ccc200
cvb049tetr003	Christoph von Beeren, Daniel Kronauer, Sebastian Pohl, Griffin Burke	14-Feb-2013	Costa Rica	Heredia	Canton Sarapiqui	La Selva Biological Station	10.423	-84.022		Tropical rainforest	collected during host colony raid	ccc200
cvb178tetr004	Christoph von Beeren, Daniel Kronauer, Sebastian Pohl, Griffin Burke	03-Mar-2013	Costa Rica	Heredia	Canton Sarapiqui	La Selva Biological Station	10.423	-84.022	19-04-2016	Tropical rainforest	collected during host colony emigration	CCE500
cvb178tetr005	Christoph von Beeren, Daniel Kronauer, Sebastian Pohl, Griffin Burke	03-Mar-2013	Costa Rica	Heredia	Canton Sarapiqui	La Selva Biological Station	10.423	-84.022	19-04-2016	Tropical rainforest	collected during host colony emigration	CCE500
cvb193tetr004	Christoph von Beeren, Daniel Kronauer, Sebastian Pohl, Griffin Burke	04-Mar-2013	Costa Rica	Heredia	Canton Sarapiqui	La Selva Biological Station	10.423	-84.022	23:00-4:00	Tropical rainforest	collected during host colony emigration	CES750
cvb193tetr005	Christoph von Beeren, Daniel Kronauer, Sebastian Pohl, Griffin Burke	04-Mar-2013	Costa Rica	Heredia	Canton Sarapiqui	La Selva Biological Station	10.423	-84.022	23:00-4:00	Tropical rainforest	collected during host colony emigration	CES750
cvb537tetr004	Christoph von Beeren, Daniel Kronauer, Sebastian Pohl, Griffin Burke	06-Apr-2013	Costa Rica	Heredia	Canton Sarapiqui	La Selva Biological Station	10.423	-84.022	22:00-1:00	Tropical rainforest	collected during host colony emigration	CES100
cvb537tetr005	Christoph von Beeren, Daniel Kronauer, Sebastian Pohl, Griffin Burke	06-Apr-2013	Costa Rica	Heredia	Canton Sarapiqui	La Selva Biological Station	10.423	-84.022	22:00-1:00	Tropical rainforest	collected during host colony emigration	CES100
cvb001tetr001	Christoph von Beeren, Daniel Kronauer, Sebastian Pohl, Griffin Burke	07-Feb-2013	Costa Rica	Heredia	Canton Sarapiqui	La Selva Biological Station	10.423	-84.022		Tropical rainforest	collected during host colony emigration	CCC1050
cvb001tetr002	Christoph von Beeren, Daniel Kronauer, Sebastian Pohl, Griffin Burke	07-Feb-2013	Costa Rica	Heredia	Canton Sarapiqui	La Selva Biological Station	10.423	-84.022		Tropical rainforest	collected during host colony emigration	CCC1050
cvb689tetr002	Christoph von Beeren, Daniel Kronauer, Sebastian Pohl, Griffin Burke	04-Apr-2014	Costa Rica	Heredia	Canton Sarapiqui	La Selva Biological Station	10.423	-84.022	22:00-0:45	Tropical rainforest	collected during host colony emigration	CCC840
cvb020tetr007	Christoph von Beeren, Daniel Kronauer, Sebastian Pohl, Griffin Burke	10-Feb-2013	Costa Rica	Heredia	Canton Sarapiqui	La Selva Biological Station	10.423	-84.022	17:45-3:00	Tropical rainforest	collected during host colony emigration	Sura 250
cvb020tetr006	Christoph von Beeren, Daniel Kronauer, Sebastian Pohl, Griffin Burke	10-Feb-2013	Costa Rica	Heredia	Canton Sarapiqui	La Selva Biological Station	10.423	-84.022	17:45-3:00	Tropical rainforest	collected during host colony emigration	Sura 250
cvb689tetr005	Christoph von Beeren, Daniel Kronauer, Sebastian Pohl, Griffin Burke	04-Apr-2014	Costa Rica	Heredia	Canton Sarapiqui	La Selva Biological Station	10.423	-84.022	22:00-0:45	Tropical rainforest	collected during host colony emigration	CCC840
cvb595tetr001	Christoph von Beeren, Daniel Kronauer, Sebastian Pohl, Griffin Burke	21-Mar-2014	Costa Rica	Heredia	Canton Sarapiqui	La Selva Biological Station	10.423	-84.022	19:30-22:00	Tropical rainforest	collected during host colony emigration	Aboretum
cvb595tetr002	Christoph von Beeren, Daniel Kronauer, Sebastian Pohl, Griffin Burke	21-Mar-2014	Costa Rica	Heredia	Canton Sarapiqui	La Selva Biological Station	10.423	-84.022	19:30-22:00	Tropical rainforest	collected during host colony emigration	Aboretum
cvb618tetr001	Christoph von Beeren, Daniel Kronauer, Sebastian Pohl, Griffin Burke	24-Mar-2014	Costa Rica	Heredia	Canton Sarapiqui	La Selva Biological Station	10.423	-84.022	21:00-23:00	Tropical rainforest	collected during host colony emigration	crossing STR CEN
cvb038tetr010	Christoph von Beeren, Daniel Kronauer, Sebastian Pohl, Griffin Burke	12-Feb-2013	Costa Rica	Heredia	Canton Sarapiqui	La Selva Biological Station	10.423	-84.022	19-04-2016	Tropical rainforest	collected during host colony emigration	Sendero Cantarana
cvb638tetr001	Christoph von Beeren, Daniel Kronauer, Sebastian Pohl, Griffin Burke	30-Mar-2014	Costa Rica	Heredia	Canton Sarapiqui	La Selva Biological Station	10.423	-84.022	19-04-2016	Tropical rainforest	collected during host colony emigration	SURA900
cvb638tetr002	Christoph von Beeren, Daniel Kronauer, Sebastian Pohl, Griffin Burke	30-Mar-2014	Costa Rica	Heredia	Canton Sarapiqui	La Selva Biological Station	10.423	-84.022	19-04-2016	Tropical rainforest	collected during host colony emigration	SURA900
cvb638tetr003	Christoph von Beeren, Daniel Kronauer, Sebastian Pohl, Griffin Burke	30-Mar-2014	Costa Rica	Heredia	Canton Sarapiqui	La Selva Biological Station	10.423	-84.022	19-04-2016	Tropical rainforest	collected during host colony emigration	SURA900
cvb750tetr006	Christoph von Beeren, Daniel Kronauer, Sebastian Pohl, Griffin Burke	27-Apr-2014	Costa Rica	Heredia	Canton Sarapiqui	La Selva Biological Station	10.423	-84.022	21:00-23:10	Tropical rainforest	collected during host colony emigration	Sendero Jaguar
cvb747tetr006	Christoph von Beeren, Daniel Kronauer, Sebastian Pohl, Griffin Burke	24-Apr-2014	Costa Rica	Heredia	Canton Sarapiqui	La Selva Biological Station	10.423	-84.022	23:45-4:00	Tropical rainforest	collected during host colony emigration	SAZ 650
cvb747tetr005	Christoph von Beeren, Daniel Kronauer, Sebastian Pohl, Griffin Burke	24-Apr-2014	Costa Rica	Heredia	Canton Sarapiqui	La Selva Biological Station	10.423	-84.022	23:45-4:00	Tropical rainforest	collected during host colony emigration	SAZ 650
cvb638tetr004	Christoph von Beeren, Daniel Kronauer, Sebastian Pohl, Griffin Burke	30-Mar-2014	Costa Rica	Heredia	Canton Sarapiqui	La Selva Biological Station	10.423	-84.022	19-04-2016	Tropical rainforest	collected during host colony emigration	SURA900
cvb097tetr006	Christoph von Beeren, Daniel Kronauer, Sebastian Pohl, Griffin Burke	19-Feb-2013	Costa Rica	Heredia	Canton Sarapiqui	La Selva Biological Station	10.423	-84.022	23:00-2:00	Tropical rainforest	collected during host colony emigration	CCl850
cvb638tetr005	Christoph von Beeren, Daniel Kronauer, Sebastian Pohl, Griffin Burke	30-Mar-2014	Costa Rica	Heredia	Canton Sarapiqui	La Selva Biological Station	10.423	-84.022	19-04-2016	Tropical rainforest	collected during host colony emigration	SURA900
cvb722tetr001	Christoph von Beeren, Daniel Kronauer, Sebastian Pohl, Griffin Burke	15-Apr-2014	Costa Rica	Heredia	Canton Sarapiqui	La Selva Biological Station	10.423	-84.022	23:40-02:20	Tropical rainforest	collected during host colony emigration	Sendero Suampo
cvb701tetr001	Christoph von Beeren, Daniel Kronauer, Sebastian Pohl, Griffin Burke	07-Apr-2014	Costa Rica	Heredia	Canton Sarapiqui	La Selva Biological Station	10.423	-84.022	19-04-2016	Tropical rainforest	collected during host colony emigration	end of CCC
cvb097tetr004	Christoph von Beeren, Daniel Kronauer, Sebastian Pohl, Griffin Burke	19-Feb-2013	Costa Rica	Heredia	Canton Sarapiqui	La Selva Biological Station	10.423	-84.022	23:00-2:00	Tropical rainforest	collected during host colony emigration	CCl850
cvb701tetr010	Christoph von Beeren, Daniel Kronauer, Sebastian Pohl, Griffin Burke	07-Apr-2014	Costa Rica	Heredia	Canton Sarapiqui	La Selva Biological Station	10.423	-84.022	19-04-2016	Tropical rainforest	collected during host colony emigration	End of CCC
cvb701tetr009	Christoph von Beeren, Daniel Kronauer, Sebastian Pohl, Griffin Burke	07-Apr-2014	Costa Rica	Heredia	Canton Sarapiqui	La Selva Biological Station	10.423	-84.022	19-04-2016	Tropical rainforest	collected during host colony emigration	End of CCC
cvb701tetr002	Christoph von Beeren, Daniel Kronauer, Sebastian Pohl, Griffin Burke	07-Apr-2014	Costa Rica	Heredia	Canton Sarapiqui	La Selva Biological Station	10.423	-84.022	19-04-2016	Tropical rainforest	collected during host colony emigration	end of CCC
cvb701tetr004	Christoph von Beeren, Daniel Kronauer, Sebastian Pohl, Griffin Burke	07-Apr-2014	Costa Rica	Heredia	Canton Sarapiqui	La Selva Biological Station	10.423	-84.022	19-04-2016	Tropical rainforest	collected during host colony emigration	end of CCC
cvb715tetr001	Christoph von Beeren, Daniel Kronauer, Sebastian Pohl, Griffin Burke	13-Apr-2014	Costa Rica	Heredia	Canton Sarapiqui	La Selva Biological Station	10.423	-84.022	19:45-22:20	Tropical rainforest	collected during host colony emigration	CES
cvb715tetr002	Christoph von Beeren, Daniel Kronauer, Sebastian Pohl, Griffin Burke	13-Apr-2014	Costa Rica	Heredia	Canton Sarapiqui	La Selva Biological Station	10.423	-84.022	19:45-22:20	Tropical rainforest	collected during host colony emigration	CES
cvb715tetr003	Christoph von Beeren, Daniel Kronauer, Sebastian Pohl, Griffin Burke	13-Apr-2014	Costa Rica	Heredia	Canton Sarapiqui	La Selva Biological Station	10.423	-84.022	19:45-22:20	Tropical rainforest	collected during host colony emigration	CES
cvb701tetr006	Christoph von Beeren, Daniel Kronauer, Sebastian Pohl, Griffin Burke	07-Apr-2014	Costa Rica	Heredia	Canton Sarapiqui	La Selva Biological Station	10.423	-84.022	19-04-2016	Tropical rainforest	collected during host colony emigration	End of CCC
cvb271tetr001	Christoph von Beeren, Daniel Kronauer, Sebastian Pohl, Griffin Burke	12-Mar-2013	Costa Rica	Heredia	Canton Sarapiqui	La Selva Biological Station	10.423	-84.022	19-04-2016	Tropical rainforest	collected during host colony emigration	CES500
cvb715tetr004	Christoph von Beeren, Daniel Kronauer, Sebastian Pohl, Griffin Burke	13-Apr-2014	Costa Rica	Heredia	Canton Sarapiqui	La Selva Biological Station	10.423	-84.022	19:45-22:20	Tropical rainforest	collected during host colony emigration	CES
cvb048tetr005	Christoph von Beeren, Daniel Kronauer, Sebastian Pohl, Griffin Burke	14-Feb-2013	Costa Rica	Heredia	Canton Sarapiqui	La Selva Biological Station	10.423	-84.022	23:00-5:00	Tropical rainforest	collected during host colony emigration	Trap to River Station
cvb048tetr004	Christoph von Beeren, Daniel Kronauer, Sebastian Pohl, Griffin Burke	14-Feb-2013	Costa Rica	Heredia	Canton Sarapiqui	La Selva Biological Station	10.423	-84.022	23:00-5:00	Tropical rainforest	collected during host colony emigration	Trap to River Station
cvb048tetr003	Christoph von Beeren, Daniel Kronauer, Sebastian Pohl, Griffin Burke	14-Feb-2013	Costa Rica	Heredia	Canton Sarapiqui	La Selva Biological Station	10.423	-84.022	23:00-5:00	Tropical rainforest	collected during host colony emigration	Trap to River Station
cvb048tetr002	Christoph von Beeren, Daniel Kronauer, Sebastian Pohl, Griffin Burke	14-Feb-2013	Costa Rica	Heredia	Canton Sarapiqui	La Selva Biological Station	10.423	-84.022	23:00-5:00	Tropical rainforest	collected during host colony emigration	Trap to River Station
cvb715tetr005	Christoph von Beeren, Daniel Kronauer, Sebastian Pohl, Griffin Burke	13-Apr-2014	Costa Rica	Heredia	Canton Sarapiqui	La Selva Biological Station	10.423	-84.022	19:45-22:20	Tropical rainforest	collected during host colony emigration	CES
cvb011tetr001	Christoph von Beeren, Daniel Kronauer, Sebastian Pohl, Griffin Burke	08-Feb-2013	Costa Rica	Heredia	Canton Sarapiqui	La Selva Biological Station	10.423	-84.022	19-04-2016	Tropical rainforest	collected during host colony emigration	CCC
cvb108tetr001	Christoph von Beeren, Daniel Kronauer, Sebastian Pohl, Griffin Burke	21-Feb-2013	Costa Rica	Heredia	Canton Sarapiqui	La Selva Biological Station	10.423	-84.022	19-04-2016	Tropical rainforest	collected in host refuse deposit	CCC300
cvb721tetr005	Christoph von Beeren, Daniel Kronauer, Sebastian Pohl, Griffin Burke	15-Apr-2014	Costa Rica	Heredia	Canton Sarapiqui	La Selva Biological Station	10.423	-84.022	23:40-02:20	Tropical rainforest	collected during host colony emigration	Sendero Suampo
cvb718tetr001	Christoph von Beeren, Daniel Kronauer, Sebastian Pohl, Griffin Burke	14-Apr-2014	Costa Rica	Heredia	Canton Sarapiqui	La Selva Biological Station	10.423	-84.022	22:00-00:15	Tropical rainforest	collected during host colony emigration	CES
cvb718tetr002	Christoph von Beeren, Daniel Kronauer, Sebastian Pohl, Griffin Burke	14-Apr-2014	Costa Rica	Heredia	Canton Sarapiqui	La Selva Biological Station	10.423	-84.022	22:00-00:15	Tropical rainforest	collected during host colony emigration	CES
cvb718tetr003	Christoph von Beeren, Daniel Kronauer, Sebastian Pohl, Griffin Burke	14-Apr-2014	Costa Rica	Heredia	Canton Sarapiqui	La Selva Biological Station	10.423	-84.022	22:00-00:15	Tropical rainforest	collected during host colony emigration	CES
cvb594tetr004	Christoph von Beeren, Daniel Kronauer, Sebastian Pohl, Griffin Burke	20-Mar-2014	Costa Rica	Heredia	Canton Sarapiqui	La Selva Biological Station	10.423	-84.022	19:00-3:00	Tropical rainforest	collected during host colony emigration	STR100
cvb594tetr003	Christoph von Beeren, Daniel Kronauer, Sebastian Pohl, Griffin Burke	20-Mar-2014	Costa Rica	Heredia	Canton Sarapiqui	La Selva Biological Station	10.423	-84.022	19:00-3:00	Tropical rainforest	collected during host colony emigration	STR100
cvb594tetr002	Christoph von Beeren, Daniel Kronauer, Sebastian Pohl, Griffin Burke	20-Mar-2014	Costa Rica	Heredia	Canton Sarapiqui	La Selva Biological Station	10.423	-84.022	19:00-3:00	Tropical rainforest	collected during host colony emigration	STR100
cvb594tetr001	Christoph von Beeren, Daniel Kronauer, Sebastian Pohl, Griffin Burke	20-Mar-2014	Costa Rica	Heredia	Canton Sarapiqui	La Selva Biological Station	10.423	-84.022	19:00-3:00	Tropical rainforest	collected during host colony emigration	STR100
cvb593tetr001	Christoph von Beeren, Daniel Kronauer, Sebastian Pohl, Griffin Burke	20-Mar-2014	Costa Rica	Heredia	Canton Sarapiqui	La Selva Biological Station	10.423	-84.022	19:00-3:00	Tropical rainforest	collected during host colony emigration	STR100
cvb734tetr005	Christoph von Beeren, Daniel Kronauer, Sebastian Pohl, Griffin Burke	22-Apr-2014	Costa Rica	Heredia	Canton Sarapiqui	La Selva Biological Station	10.423	-84.022	19:45-23:!5	Tropical rainforest	collected during host colony emigration	CEN
cvb734tetr004	Christoph von Beeren, Daniel Kronauer, Sebastian Pohl, Griffin Burke	22-Apr-2014	Costa Rica	Heredia	Canton Sarapiqui	La Selva Biological Station	10.423	-84.022	19:45-23:!5	Tropical rainforest	collected during host colony emigration	CEN
cvb734tetr003	Christoph von Beeren, Daniel Kronauer, Sebastian Pohl, Griffin Burke	22-Apr-2014	Costa Rica	Heredia	Canton Sarapiqui	La Selva Biological Station	10.423	-84.022	19:45-23:!5	Tropical rainforest	collected during host colony emigration	CEN
cvb734tetr002	Christoph von Beeren, Daniel Kronauer, Sebastian Pohl, Griffin Burke	22-Apr-2014	Costa Rica	Heredia	Canton Sarapiqui	La Selva Biological Station	10.423	-84.022	19:45-23:!5	Tropical rainforest	collected during host colony emigration	CEN
cvb734tetr001	Christoph von Beeren, Daniel Kronauer, Sebastian Pohl, Griffin Burke	22-Apr-2014	Costa Rica	Heredia	Canton Sarapiqui	La Selva Biological Station	10.423	-84.022	19:45-23:!5	Tropical rainforest	collected during host colony emigration	CEN
cvb733tetr001	Christoph von Beeren, Daniel Kronauer, Sebastian Pohl, Griffin Burke	21-Apr-2014	Costa Rica	Heredia	Canton Sarapiqui	La Selva Biological Station	10.423	-84.022	0:40-2:45	Tropical rainforest	collected during host colony emigration	way up to River Station
cvb725tetr005	Christoph von Beeren, Daniel Kronauer, Sebastian Pohl, Griffin Burke	17-Apr-2014	Costa Rica	Heredia	Canton Sarapiqui	La Selva Biological Station	10.423	-84.022	20:45-05:15	Tropical rainforest	collected during host colony raid	CEN 450
cvb725tetr004	Christoph von Beeren, Daniel Kronauer, Sebastian Pohl, Griffin Burke	17-Apr-2014	Costa Rica	Heredia	Canton Sarapiqui	La Selva Biological Station	10.423	-84.022	20:45-05:15	Tropical rainforest	collected during host colony raid	CEN 450
cvb725tetr003	Christoph von Beeren, Daniel Kronauer, Sebastian Pohl, Griffin Burke	17-Apr-2014	Costa Rica	Heredia	Canton Sarapiqui	La Selva Biological Station	10.423	-84.022	20:45-05:15	Tropical rainforest	collected during host colony raid	CEN 450
cvb725tetr002	Christoph von Beeren, Daniel Kronauer, Sebastian Pohl, Griffin Burke	17-Apr-2014	Costa Rica	Heredia	Canton Sarapiqui	La Selva Biological Station	10.423	-84.022	20:45-05:15	Tropical rainforest	collected during host colony raid	CEN 450
cvb725tetr001	Christoph von Beeren, Daniel Kronauer, Sebastian Pohl, Griffin Burke	17-Apr-2014	Costa Rica	Heredia	Canton Sarapiqui	La Selva Biological Station	10.423	-84.022	20:45-05:15	Tropical rainforest	collected during host colony raid	CEN 450
cvb750tetr005	Christoph von Beeren, Daniel Kronauer, Sebastian Pohl, Griffin Burke	27-Apr-2014	Costa Rica	Heredia	Canton Sarapiqui	La Selva Biological Station	10.423	-84.022	21:00-23:10	Tropical rainforest	collected during host colony emigration	Sendero Jaguar
cvb750tetr004	Christoph von Beeren, Daniel Kronauer, Sebastian Pohl, Griffin Burke	27-Apr-2014	Costa Rica	Heredia	Canton Sarapiqui	La Selva Biological Station	10.423	-84.022	21:00-23:10	Tropical rainforest	collected during host colony emigration	Sendero Jaguar
cvb750tetr003	Christoph von Beeren, Daniel Kronauer, Sebastian Pohl, Griffin Burke	27-Apr-2014	Costa Rica	Heredia	Canton Sarapiqui	La Selva Biological Station	10.423	-84.022	21:00-23:10	Tropical rainforest	collected during host colony emigration	Sendero Jaguar
cvb750tetr002	Christoph von Beeren, Daniel Kronauer, Sebastian Pohl, Griffin Burke	27-Apr-2014	Costa Rica	Heredia	Canton Sarapiqui	La Selva Biological Station	10.423	-84.022	21:00-23:10	Tropical rainforest	collected during host colony emigration	Sendero Jaguar
cvb747tetr004	Christoph von Beeren, Daniel Kronauer, Sebastian Pohl, Griffin Burke	24-Apr-2014	Costa Rica	Heredia	Canton Sarapiqui	La Selva Biological Station	10.423	-84.022	23:45-4:00	Tropical rainforest	collected during host colony emigration	SAZ 650
cvb750tetr001	Christoph von Beeren, Daniel Kronauer, Sebastian Pohl, Griffin Burke	27-Apr-2014	Costa Rica	Heredia	Canton Sarapiqui	La Selva Biological Station	10.423	-84.022	21:00-23:10	Tropical rainforest	collected during host colony emigration	Sendero Jaguar
cvb747tetr003	Christoph von Beeren, Daniel Kronauer, Sebastian Pohl, Griffin Burke	24-Apr-2014	Costa Rica	Heredia	Canton Sarapiqui	La Selva Biological Station	10.423	-84.022	23:45-4:00	Tropical rainforest	collected during host colony emigration	SAZ 650
cvb747tetr002	Christoph von Beeren, Daniel Kronauer, Sebastian Pohl, Griffin Burke	24-Apr-2014	Costa Rica	Heredia	Canton Sarapiqui	La Selva Biological Station	10.423	-84.022	23:45-4:00	Tropical rainforest	collected during host colony emigration	SAZ 650
cvb747tetr001	Christoph von Beeren, Daniel Kronauer, Sebastian Pohl, Griffin Burke	24-Apr-2014	Costa Rica	Heredia	Canton Sarapiqui	La Selva Biological Station	10.423	-84.022	23:45-4:00	Tropical rainforest	collected during host colony emigration	SAZ 650
cvb702tetr005	Christoph von Beeren, Daniel Kronauer, Sebastian Pohl, Griffin Burke	08-Apr-2014	Costa Rica	Heredia	Canton Sarapiqui	La Selva Biological Station	10.423	-84.022	19:00-23:15	Tropical rainforest	collected during host colony emigration	CCC450
cvb702tetr004	Christoph von Beeren, Daniel Kronauer, Sebastian Pohl, Griffin Burke	08-Apr-2014	Costa Rica	Heredia	Canton Sarapiqui	La Selva Biological Station	10.423	-84.022	19:00-23:15	Tropical rainforest	collected during host colony emigration	CCC450
cvb702tetr003	Christoph von Beeren, Daniel Kronauer, Sebastian Pohl, Griffin Burke	08-Apr-2014	Costa Rica	Heredia	Canton Sarapiqui	La Selva Biological Station	10.423	-84.022	19:00-23:15	Tropical rainforest	collected during host colony emigration	CCC450
cvb702tetr002	Christoph von Beeren, Daniel Kronauer, Sebastian Pohl, Griffin Burke	08-Apr-2014	Costa Rica	Heredia	Canton Sarapiqui	La Selva Biological Station	10.423	-84.022	19:00-23:15	Tropical rainforest	collected during host colony emigration	CCC450
cvb702tetr001	Christoph von Beeren, Daniel Kronauer, Sebastian Pohl, Griffin Burke	08-Apr-2014	Costa Rica	Heredia	Canton Sarapiqui	La Selva Biological Station	10.423	-84.022	19:00-23:15	Tropical rainforest	collected during host colony emigration	CCC450
cvb721sta001	Christoph von Beeren, Daniel Kronauer, Sebastian Pohl, Griffin Burke	15-Apr-2014	Costa Rica	Heredia	Canton Sarapiqui	La Selva Biological Station	10.423	-84.022	23:40-02:20	Tropical rainforest	collected during host colony emigration	Sendero Suampo
cvb721tetr004	Christoph von Beeren, Daniel Kronauer, Sebastian Pohl, Griffin Burke	15-Apr-2014	Costa Rica	Heredia	Canton Sarapiqui	La Selva Biological Station	10.423	-84.022	23:40-02:20	Tropical rainforest	collected during host colony emigration	Sendero Suampo
cvb721tetr003	Christoph von Beeren, Daniel Kronauer, Sebastian Pohl, Griffin Burke	15-Apr-2014	Costa Rica	Heredia	Canton Sarapiqui	La Selva Biological Station	10.423	-84.022	23:40-02:20	Tropical rainforest	collected during host colony emigration	Sendero Suampo
cvb721tetr002	Christoph von Beeren, Daniel Kronauer, Sebastian Pohl, Griffin Burke	15-Apr-2014	Costa Rica	Heredia	Canton Sarapiqui	La Selva Biological Station	10.423	-84.022	23:40-02:20	Tropical rainforest	collected during host colony emigration	Sendero Suampo
cvb721tetr001	Christoph von Beeren, Daniel Kronauer, Sebastian Pohl, Griffin Burke	15-Apr-2014	Costa Rica	Heredia	Canton Sarapiqui	La Selva Biological Station	10.423	-84.022	23:40-02:20	Tropical rainforest	collected during host colony emigration	Sendero Suampo
cvb692tetr005	Christoph von Beeren, Daniel Kronauer, Sebastian Pohl, Griffin Burke	04-May-2014	Costa Rica	Heredia	Canton Sarapiqui	La Selva Biological Station	10.423	-84.022	20:45-23:45	Tropical rainforest	collected during host colony emigration	CEN
cvb692tetr004	Christoph von Beeren, Daniel Kronauer, Sebastian Pohl, Griffin Burke	04-May-2014	Costa Rica	Heredia	Canton Sarapiqui	La Selva Biological Station	10.423	-84.022	20:45-23:45	Tropical rainforest	collected during host colony emigration	CEN
cvb687tetr009	Christoph von Beeren, Daniel Kronauer, Sebastian Pohl, Griffin Burke	04-Apr-2014	Costa Rica	Heredia	Canton Sarapiqui	La Selva Biological Station	10.423	-84.022	22:00-0:45	Tropical rainforest	collected during host colony emigration	CCC840
cvb038tetr014	Christoph von Beeren, Daniel Kronauer, Sebastian Pohl, Griffin Burke	12-Feb-2013	Costa Rica	Heredia	Canton Sarapiqui	La Selva Biological Station	10.423	-84.022	19-04-2016	Tropical rainforest	collected during host colony emigration	Sendero Cantarana
cvb451tetr010	Christoph von Beeren, Daniel Kronauer, Sebastian Pohl, Griffin Burke	29-Mar-2013	Costa Rica	Heredia	Canton Sarapiqui	La Selva Biological Station	10.423	-84.022	17:40-21:45	Tropical rainforest	collected during host colony emigration	STR650
cvb451tetr007	Christoph von Beeren, Daniel Kronauer, Sebastian Pohl, Griffin Burke	29-Mar-2013	Costa Rica	Heredia	Canton Sarapiqui	La Selva Biological Station	10.423	-84.022	17:40-21:45	Tropical rainforest	collected during host colony emigration	STR650
cvb451tetr006	Christoph von Beeren, Daniel Kronauer, Sebastian Pohl, Griffin Burke	29-Mar-2013	Costa Rica	Heredia	Canton Sarapiqui	La Selva Biological Station	10.423	-84.022	17:40-21:45	Tropical rainforest	collected during host colony emigration	STR650
cvb433tetr009	Christoph von Beeren, Daniel Kronauer, Sebastian Pohl, Griffin Burke	25-Mar-2013	Costa Rica	Heredia	Canton Sarapiqui	La Selva Biological Station	10.423	-84.022	22:00-23:45	Tropical rainforest	collected during host colony emigration	SEDR100
cvb316tetr010	Christoph von Beeren, Daniel Kronauer, Sebastian Pohl, Griffin Burke	17-Mar-2013	Costa Rica	Heredia	Canton Sarapiqui	La Selva Biological Station	10.423	-84.022	21:30-0:30	Tropical rainforest	collected during host colony emigration	CCC300
cvb316tetr009	Christoph von Beeren, Daniel Kronauer, Sebastian Pohl, Griffin Burke	17-Mar-2013	Costa Rica	Heredia	Canton Sarapiqui	La Selva Biological Station	10.423	-84.022	21:30-0:30	Tropical rainforest	collected during host colony emigration	CCC300
cvb010tetr011	Christoph von Beeren, Daniel Kronauer, Sebastian Pohl, Griffin Burke	08-Feb-2013	Costa Rica	Heredia	Canton Sarapiqui	La Selva Biological Station	10.423	-84.022	19-04-2016	Tropical rainforest	collected during host colony emigration	CCC
cvb010tetr010	Christoph von Beeren, Daniel Kronauer, Sebastian Pohl, Griffin Burke	08-Feb-2013	Costa Rica	Heredia	Canton Sarapiqui	La Selva Biological Station	10.423	-84.022	19-04-2016	Tropical rainforest	collected during host colony emigration	CCC
cvb010tetr009	Christoph von Beeren, Daniel Kronauer, Sebastian Pohl, Griffin Burke	08-Feb-2013	Costa Rica	Heredia	Canton Sarapiqui	La Selva Biological Station	10.423	-84.022	19-04-2016	Tropical rainforest	collected during host colony emigration	CCC
cvb010tetr008	Christoph von Beeren, Daniel Kronauer, Sebastian Pohl, Griffin Burke	08-Feb-2013	Costa Rica	Heredia	Canton Sarapiqui	La Selva Biological Station	10.423	-84.022	19-04-2016	Tropical rainforest	collected during host colony emigration	CCC
cvb010tetr007	Christoph von Beeren, Daniel Kronauer, Sebastian Pohl, Griffin Burke	08-Feb-2013	Costa Rica	Heredia	Canton Sarapiqui	La Selva Biological Station	10.423	-84.022	19-04-2016	Tropical rainforest	collected during host colony emigration	CCC
cvb687tetr010	Christoph von Beeren, Daniel Kronauer, Sebastian Pohl, Griffin Burke	04-Apr-2014	Costa Rica	Heredia	Canton Sarapiqui	La Selva Biological Station	10.423	-84.022	22:00-0:45	Tropical rainforest	collected during host colony emigration	CCC840
cvb687tetr008	Christoph von Beeren, Daniel Kronauer, Sebastian Pohl, Griffin Burke	04-Apr-2014	Costa Rica	Heredia	Canton Sarapiqui	La Selva Biological Station	10.423	-84.022	22:00-0:45	Tropical rainforest	collected during host colony emigration	CCC840
cvb687tetr007	Christoph von Beeren, Daniel Kronauer, Sebastian Pohl, Griffin Burke	04-Apr-2014	Costa Rica	Heredia	Canton Sarapiqui	La Selva Biological Station	10.423	-84.022	22:00-0:45	Tropical rainforest	collected during host colony emigration	CCC840
cvb687tetr006	Christoph von Beeren, Daniel Kronauer, Sebastian Pohl, Griffin Burke	04-Apr-2014	Costa Rica	Heredia	Canton Sarapiqui	La Selva Biological Station	10.423	-84.022	22:00-0:45	Tropical rainforest	collected during host colony emigration	CCC840
cvb676tetr008	Christoph von Beeren, Daniel Kronauer, Sebastian Pohl, Griffin Burke	31-Mar-2014	Costa Rica	Heredia	Canton Sarapiqui	La Selva Biological Station	10.423	-84.022	20:15-22:10	Tropical rainforest	collected during host colony emigration	CEN
cvb676tetr007	Christoph von Beeren, Daniel Kronauer, Sebastian Pohl, Griffin Burke	31-Mar-2014	Costa Rica	Heredia	Canton Sarapiqui	La Selva Biological Station	10.423	-84.022	20:15-22:10	Tropical rainforest	collected during host colony emigration	CEN
cvb606tetr010	Christoph von Beeren, Daniel Kronauer, Sebastian Pohl, Griffin Burke	23-Mar-2014	Costa Rica	Heredia	Canton Sarapiqui	La Selva Biological Station	10.423	-84.022	19:00-22:00	Tropical rainforest	collected during host colony emigration	Suax
cvb606tetr009	Christoph von Beeren, Daniel Kronauer, Sebastian Pohl, Griffin Burke	23-Mar-2014	Costa Rica	Heredia	Canton Sarapiqui	La Selva Biological Station	10.423	-84.022	19:00-22:00	Tropical rainforest	collected during host colony emigration	Suax
cvb606tetr008	Christoph von Beeren, Daniel Kronauer, Sebastian Pohl, Griffin Burke	23-Mar-2014	Costa Rica	Heredia	Canton Sarapiqui	La Selva Biological Station	10.423	-84.022	19:00-22:00	Tropical rainforest	collected during host colony emigration	Suax
cvb606tetr007	Christoph von Beeren, Daniel Kronauer, Sebastian Pohl, Griffin Burke	23-Mar-2014	Costa Rica	Heredia	Canton Sarapiqui	La Selva Biological Station	10.423	-84.022	19:00-22:00	Tropical rainforest	collected during host colony emigration	Suax
cvb606tetr006	Christoph von Beeren, Daniel Kronauer, Sebastian Pohl, Griffin Burke	23-Mar-2014	Costa Rica	Heredia	Canton Sarapiqui	La Selva Biological Station	10.423	-84.022	19:00-22:00	Tropical rainforest	collected during host colony emigration	Suax
cvb541tetr010	Christoph von Beeren, Daniel Kronauer, Sebastian Pohl, Griffin Burke	07-Apr-2013	Costa Rica	Heredia	Canton Sarapiqui	La Selva Biological Station	10.423	-84.022	17:00-20:00	Tropical rainforest	collected during host colony emigration	SURA550
cvb499tetr001	Christoph von Beeren, Daniel Kronauer, Sebastian Pohl, Griffin Burke	03-Apr-2013	Costa Rica	Heredia	Canton Sarapiqui	La Selva Biological Station	10.423	-84.022	22:00-23:30	Tropical rainforest	collected during host colony emigration	SURA0
cvb433tetr006	Christoph von Beeren, Daniel Kronauer, Sebastian Pohl, Griffin Burke	25-Mar-2013	Costa Rica	Heredia	Canton Sarapiqui	La Selva Biological Station	10.423	-84.022	22:00-23:45	Tropical rainforest	collected during host colony emigration	SEDR100
cvb689tetr004	Christoph von Beeren, Daniel Kronauer, Sebastian Pohl, Griffin Burke	04-Apr-2014	Costa Rica	Heredia	Canton Sarapiqui	La Selva Biological Station	10.423	-84.022	22:00-0:45	Tropical rainforest	collected during host colony emigration	CCC840
cvb689tetr003	Christoph von Beeren, Daniel Kronauer, Sebastian Pohl, Griffin Burke	04-Apr-2014	Costa Rica	Heredia	Canton Sarapiqui	La Selva Biological Station	10.423	-84.022	22:00-0:45	Tropical rainforest	collected during host colony emigration	CCC840
cvb676tetr005	Christoph von Beeren, Daniel Kronauer, Sebastian Pohl, Griffin Burke	31-Mar-2014	Costa Rica	Heredia	Canton Sarapiqui	La Selva Biological Station	10.423	-84.022	20:15-22:10	Tropical rainforest	collected during host colony emigration	CEN
cvb676tetr003	Christoph von Beeren, Daniel Kronauer, Sebastian Pohl, Griffin Burke	31-Mar-2014	Costa Rica	Heredia	Canton Sarapiqui	La Selva Biological Station	10.423	-84.022	20:15-22:10	Tropical rainforest	collected during host colony emigration	CEN
cvb676tetr002	Christoph von Beeren, Daniel Kronauer, Sebastian Pohl, Griffin Burke	31-Mar-2014	Costa Rica	Heredia	Canton Sarapiqui	La Selva Biological Station	10.423	-84.022	20:15-22:10	Tropical rainforest	collected during host colony emigration	CEN
cvb606tetr004	Christoph von Beeren, Daniel Kronauer, Sebastian Pohl, Griffin Burke	23-Mar-2014	Costa Rica	Heredia	Canton Sarapiqui	La Selva Biological Station	10.423	-84.022	19:00-22:00	Tropical rainforest	collected during host colony emigration	Suax
cvb606tetr002	Christoph von Beeren, Daniel Kronauer, Sebastian Pohl, Griffin Burke	23-Mar-2014	Costa Rica	Heredia	Canton Sarapiqui	La Selva Biological Station	10.423	-84.022	19:00-22:00	Tropical rainforest	collected during host colony emigration	Suax
cvb606tetr001	Christoph von Beeren, Daniel Kronauer, Sebastian Pohl, Griffin Burke	23-Mar-2014	Costa Rica	Heredia	Canton Sarapiqui	La Selva Biological Station	10.423	-84.022	19:00-22:00	Tropical rainforest	collected during host colony emigration	Suax
cvb603tetr005	Christoph von Beeren, Daniel Kronauer, Sebastian Pohl, Griffin Burke	23-Mar-2014	Costa Rica	Heredia	Canton Sarapiqui	La Selva Biological Station	10.423	-84.022	18:00-18:45	Tropical rainforest	collected during host colony raid	SSE1100
cvb603tetr004	Christoph von Beeren, Daniel Kronauer, Sebastian Pohl, Griffin Burke	23-Mar-2014	Costa Rica	Heredia	Canton Sarapiqui	La Selva Biological Station	10.423	-84.022	18:00-18:45	Tropical rainforest	collected during host colony raid	SSE1100
cvb603tetr003	Christoph von Beeren, Daniel Kronauer, Sebastian Pohl, Griffin Burke	23-Mar-2014	Costa Rica	Heredia	Canton Sarapiqui	La Selva Biological Station	10.423	-84.022	18:00-18:45	Tropical rainforest	collected during host colony raid	SSE1100
cvb603tetr002	Christoph von Beeren, Daniel Kronauer, Sebastian Pohl, Griffin Burke	23-Mar-2014	Costa Rica	Heredia	Canton Sarapiqui	La Selva Biological Station	10.423	-84.022	18:00-18:45	Tropical rainforest	collected during host colony raid	SSE1100
cvb603tetr001	Christoph von Beeren, Daniel Kronauer, Sebastian Pohl, Griffin Burke	23-Mar-2014	Costa Rica	Heredia	Canton Sarapiqui	La Selva Biological Station	10.423	-84.022	18:00-18:45	Tropical rainforest	collected during host colony raid	SSE1100
cvb541tetr006	Christoph von Beeren, Daniel Kronauer, Sebastian Pohl, Griffin Burke	07-Apr-2013	Costa Rica	Heredia	Canton Sarapiqui	La Selva Biological Station	10.423	-84.022	17:00-20:00	Tropical rainforest	collected during host colony emigration	SURA550
cvb541tetr005	Christoph von Beeren, Daniel Kronauer, Sebastian Pohl, Griffin Burke	07-Apr-2013	Costa Rica	Heredia	Canton Sarapiqui	La Selva Biological Station	10.423	-84.022	17:00-20:00	Tropical rainforest	collected during host colony emigration	SURA550
cvb541tetr004	Christoph von Beeren, Daniel Kronauer, Sebastian Pohl, Griffin Burke	07-Apr-2013	Costa Rica	Heredia	Canton Sarapiqui	La Selva Biological Station	10.423	-84.022	17:00-20:00	Tropical rainforest	collected during host colony emigration	SURA550
cvb488tetr005	Christoph von Beeren, Daniel Kronauer, Sebastian Pohl, Griffin Burke	02-Apr-2013	Costa Rica	Heredia	Canton Sarapiqui	La Selva Biological Station	10.423	-84.022	18:00-22:00	Tropical rainforest	collected during host colony emigration	cabina 5
cvb488tetr004	Christoph von Beeren, Daniel Kronauer, Sebastian Pohl, Griffin Burke	02-Apr-2013	Costa Rica	Heredia	Canton Sarapiqui	La Selva Biological Station	10.423	-84.022	18:00-22:00	Tropical rainforest	collected during host colony emigration	cabina 5
cvb488tetr003	Christoph von Beeren, Daniel Kronauer, Sebastian Pohl, Griffin Burke	02-Apr-2013	Costa Rica	Heredia	Canton Sarapiqui	La Selva Biological Station	10.423	-84.022	18:00-22:00	Tropical rainforest	collected during host colony emigration	cabina 5
cvb488tetr002	Christoph von Beeren, Daniel Kronauer, Sebastian Pohl, Griffin Burke	02-Apr-2013	Costa Rica	Heredia	Canton Sarapiqui	La Selva Biological Station	10.423	-84.022	18:00-22:00	Tropical rainforest	collected during host colony emigration	cabina 5
cvb488tetr001	Christoph von Beeren, Daniel Kronauer, Sebastian Pohl, Griffin Burke	02-Apr-2013	Costa Rica	Heredia	Canton Sarapiqui	La Selva Biological Station	10.423	-84.022	18:00-22:00	Tropical rainforest	collected during host colony emigration	cabina 5
cvb451tetr005	Christoph von Beeren, Daniel Kronauer, Sebastian Pohl, Griffin Burke	29-Mar-2013	Costa Rica	Heredia	Canton Sarapiqui	La Selva Biological Station	10.423	-84.022	17:40-21:45	Tropical rainforest	collected during host colony emigration	STR650
cvb433tetr005	Christoph von Beeren, Daniel Kronauer, Sebastian Pohl, Griffin Burke	25-Mar-2013	Costa Rica	Heredia	Canton Sarapiqui	La Selva Biological Station	10.423	-84.022	22:00-23:45	Tropical rainforest	collected during host colony emigration	SEDR100
cvb433tetr004	Christoph von Beeren, Daniel Kronauer, Sebastian Pohl, Griffin Burke	25-Mar-2013	Costa Rica	Heredia	Canton Sarapiqui	La Selva Biological Station	10.423	-84.022	22:00-23:45	Tropical rainforest	collected during host colony emigration	SEDR100
cvb433tetr003	Christoph von Beeren, Daniel Kronauer, Sebastian Pohl, Griffin Burke	25-Mar-2013	Costa Rica	Heredia	Canton Sarapiqui	La Selva Biological Station	10.423	-84.022	22:00-23:45	Tropical rainforest	collected during host colony emigration	SEDR100
cvb433tetr002	Christoph von Beeren, Daniel Kronauer, Sebastian Pohl, Griffin Burke	25-Mar-2013	Costa Rica	Heredia	Canton Sarapiqui	La Selva Biological Station	10.423	-84.022	22:00-23:45	Tropical rainforest	collected during host colony emigration	SEDR100
cvb433tetr001	Christoph von Beeren, Daniel Kronauer, Sebastian Pohl, Griffin Burke	25-Mar-2013	Costa Rica	Heredia	Canton Sarapiqui	La Selva Biological Station	10.423	-84.022	22:00-23:45	Tropical rainforest	collected during host colony emigration	SEDR100
cvb382tetr005	Christoph von Beeren, Daniel Kronauer, Sebastian Pohl, Griffin Burke	19-Mar-2013	Costa Rica	Heredia	Canton Sarapiqui	La Selva Biological Station	10.423	-84.022	18:00-21:00	Tropical rainforest	collected during host colony raid	STR50
cvb382tetr004	Christoph von Beeren, Daniel Kronauer, Sebastian Pohl, Griffin Burke	19-Mar-2013	Costa Rica	Heredia	Canton Sarapiqui	La Selva Biological Station	10.423	-84.022	18:00-21:00	Tropical rainforest	collected during host colony raid	STR50
cvb010tetr006	Christoph von Beeren, Daniel Kronauer, Sebastian Pohl, Griffin Burke	08-Feb-2013	Costa Rica	Heredia	Canton Sarapiqui	La Selva Biological Station	10.423	-84.022	19-04-2016	Tropical rainforest	collected during host colony emigration	CCC
cvb010tetr005	Christoph von Beeren, Daniel Kronauer, Sebastian Pohl, Griffin Burke	08-Feb-2013	Costa Rica	Heredia	Canton Sarapiqui	La Selva Biological Station	10.423	-84.022	19-04-2016	Tropical rainforest	collected during host colony emigration	CCC
cvb316tetr005	Christoph von Beeren, Daniel Kronauer, Sebastian Pohl, Griffin Burke	17-Mar-2013	Costa Rica	Heredia	Canton Sarapiqui	La Selva Biological Station	10.423	-84.022	21:30-0:30	Tropical rainforest	collected during host colony emigration	CCC300
cvb316tetr004	Christoph von Beeren, Daniel Kronauer, Sebastian Pohl, Griffin Burke	17-Mar-2013	Costa Rica	Heredia	Canton Sarapiqui	La Selva Biological Station	10.423	-84.022	21:30-0:30	Tropical rainforest	collected during host colony emigration	CCC300
cvb399tetr002	Christoph von Beeren, Daniel Kronauer, Sebastian Pohl, Griffin Burke	21-Mar-2013	Costa Rica	Heredia	Canton Sarapiqui	La Selva Biological Station	10.423	-84.022	17:00-19:30	Tropical rainforest	collected during host colony emigration	STR750
cvb382tetr003	Christoph von Beeren, Daniel Kronauer, Sebastian Pohl, Griffin Burke	19-Mar-2013	Costa Rica	Heredia	Canton Sarapiqui	La Selva Biological Station	10.423	-84.022	18:00-21:00	Tropical rainforest	collected during host colony raid	STR50
cvb382tetr002	Christoph von Beeren, Daniel Kronauer, Sebastian Pohl, Griffin Burke	19-Mar-2013	Costa Rica	Heredia	Canton Sarapiqui	La Selva Biological Station	10.423	-84.022	18:00-21:00	Tropical rainforest	collected during host colony raid	STR50
cvb010tetr003	Christoph von Beeren, Daniel Kronauer, Sebastian Pohl, Griffin Burke	08-Feb-2013	Costa Rica	Heredia	Canton Sarapiqui	La Selva Biological Station	10.423	-84.022	19-04-2016	Tropical rainforest	collected during host colony emigration	CCC
cvb010tetr002	Christoph von Beeren, Daniel Kronauer, Sebastian Pohl, Griffin Burke	08-Feb-2013	Costa Rica	Heredia	Canton Sarapiqui	La Selva Biological Station	10.423	-84.022	19-04-2016	Tropical rainforest	collected during host colony emigration	CCC
cvb451tetr003	Christoph von Beeren, Daniel Kronauer, Sebastian Pohl, Griffin Burke	29-Mar-2013	Costa Rica	Heredia	Canton Sarapiqui	La Selva Biological Station	10.423	-84.022	17:40-21:45	Tropical rainforest	collected during host colony emigration	STR650
cvb451tetr002	Christoph von Beeren, Daniel Kronauer, Sebastian Pohl, Griffin Burke	29-Mar-2013	Costa Rica	Heredia	Canton Sarapiqui	La Selva Biological Station	10.423	-84.022	17:40-21:45	Tropical rainforest	collected during host colony emigration	STR650
cvb451tetr001	Christoph von Beeren, Daniel Kronauer, Sebastian Pohl, Griffin Burke	29-Mar-2013	Costa Rica	Heredia	Canton Sarapiqui	La Selva Biological Station	10.423	-84.022	17:40-21:45	Tropical rainforest	collected during host colony emigration	STR650
cvb316tetr003	Christoph von Beeren, Daniel Kronauer, Sebastian Pohl, Griffin Burke	17-Mar-2013	Costa Rica	Heredia	Canton Sarapiqui	La Selva Biological Station	10.423	-84.022	21:30-0:30	Tropical rainforest	collected during host colony emigration	CCC300
cvb371tetr006	Christoph von Beeren, Daniel Kronauer, Sebastian Pohl, Griffin Burke	18-Mar-2013	Costa Rica	Heredia	Canton Sarapiqui	La Selva Biological Station	10.423	-84.022	19:00-0:30	Tropical rainforest	collected during host colony emigration	SURA150
cvb249tetr006	Christoph von Beeren, Daniel Kronauer, Sebastian Pohl, Griffin Burke	10-Mar-2013	Costa Rica	Heredia	Canton Sarapiqui	La Selva Biological Station	10.423	-84.022	20:00-4:00	Tropical rainforest	collected during host colony emigration	CES550
cvb097tetr005	Christoph von Beeren, Daniel Kronauer, Sebastian Pohl, Griffin Burke	19-Feb-2013	Costa Rica	Heredia	Canton Sarapiqui	La Selva Biological Station	10.423	-84.022	23:00-2:00	Tropical rainforest	collected during host colony emigration	CCl850
cvb007tetr001	Christoph von Beeren, Daniel Kronauer, Sebastian Pohl, Griffin Burke	08-Feb-2013	Costa Rica	Heredia	Canton Sarapiqui	La Selva Biological Station	10.423	-84.022	19-04-2016	Tropical rainforest	collected during host colony emigration	CCC350
cvb451tetr009	Christoph von Beeren, Daniel Kronauer, Sebastian Pohl, Griffin Burke	29-Mar-2013	Costa Rica	Heredia	Canton Sarapiqui	La Selva Biological Station	10.423	-84.022	17:40-21:45	Tropical rainforest	collected during host colony emigration	STR650
cvb104tetr009	Christoph von Beeren, Daniel Kronauer, Sebastian Pohl, Griffin Burke	21-Feb-2013	Costa Rica	Heredia	Canton Sarapiqui	La Selva Biological Station	10.423	-84.022	17:30-18:30; 19:30-20:30	Tropical rainforest	collected during host colony emigration	Trail to estacion del rio
cvb104tetr010	Christoph von Beeren, Daniel Kronauer, Sebastian Pohl, Griffin Burke	21-Feb-2013	Costa Rica	Heredia	Canton Sarapiqui	La Selva Biological Station	10.423	-84.022	17:30-18:30; 19:30-20:30	Tropical rainforest	collected during host colony emigration	Trail to estacion del rio
cvb097tetr011	Christoph von Beeren, Daniel Kronauer, Sebastian Pohl, Griffin Burke	19-Feb-2013	Costa Rica	Heredia	Canton Sarapiqui	La Selva Biological Station	10.423	-84.022	23:00-2:00	Tropical rainforest	collected during host colony emigration	CCl850
cvb390tetr003	Christoph von Beeren, Daniel Kronauer, Sebastian Pohl, Griffin Burke	20-Mar-2013	Costa Rica	Heredia	Canton Sarapiqui	La Selva Biological Station	10.423	-84.022	21:00-0:30	Tropical rainforest	collected during host colony emigration	SURA50
cvb390tetr002	Christoph von Beeren, Daniel Kronauer, Sebastian Pohl, Griffin Burke	20-Mar-2013	Costa Rica	Heredia	Canton Sarapiqui	La Selva Biological Station	10.423	-84.022	21:00-0:30	Tropical rainforest	collected during host colony emigration	SURA50
cvb390tetr001	Christoph von Beeren, Daniel Kronauer, Sebastian Pohl, Griffin Burke	17-Mar-2013	Costa Rica	Heredia	Canton Sarapiqui	La Selva Biological Station	10.423	-84.022	19-04-2016	Tropical rainforest	collected in host refuse deposit	STR1050
cvb316tetr002	Christoph von Beeren, Daniel Kronauer, Sebastian Pohl, Griffin Burke	17-Mar-2013	Costa Rica	Heredia	Canton Sarapiqui	La Selva Biological Station	10.423	-84.022	21:30-0:30	Tropical rainforest	collected during host colony emigration	CCC300
cvb451tetr004	Christoph von Beeren, Daniel Kronauer, Sebastian Pohl, Griffin Burke	29-Mar-2013	Costa Rica	Heredia	Canton Sarapiqui	La Selva Biological Station	10.423	-84.022	17:40-21:45	Tropical rainforest	collected during host colony emigration	STR650
cvb316tetr001	Christoph von Beeren, Daniel Kronauer, Sebastian Pohl, Griffin Burke	17-Mar-2013	Costa Rica	Heredia	Canton Sarapiqui	La Selva Biological Station	10.423	-84.022	21:30-0:30	Tropical rainforest	collected during host colony emigration	CCC300
cvb104tetr011	Christoph von Beeren, Daniel Kronauer, Sebastian Pohl, Griffin Burke	21-Feb-2013	Costa Rica	Heredia	Canton Sarapiqui	La Selva Biological Station	10.423	-84.022	17:30-18:30; 19:30-20:30	Tropical rainforest	collected during host colony emigration	Trail to estacion del rio
cvb104tetr012	Christoph von Beeren, Daniel Kronauer, Sebastian Pohl, Griffin Burke	21-Feb-2013	Costa Rica	Heredia	Canton Sarapiqui	La Selva Biological Station	10.423	-84.022	17:30-18:30; 19:30-20:30	Tropical rainforest	collected during host colony emigration	Trail to estacion del rio
cvb038tetr013	Christoph von Beeren, Daniel Kronauer, Sebastian Pohl, Griffin Burke	12-Feb-2013	Costa Rica	Heredia	Canton Sarapiqui	La Selva Biological Station	10.423	-84.022	19-04-2016	Tropical rainforest	collected during host colony emigration	Sendero Cantarana
cvb038tetr003	Christoph von Beeren, Daniel Kronauer, Sebastian Pohl, Griffin Burke	12-Feb-2013	Costa Rica	Heredia	Canton Sarapiqui	La Selva Biological Station	10.423	-84.022	19-04-2016	Tropical rainforest	collected during host colony emigration	Sendero Cantarana
cvb399tetr007	Christoph von Beeren, Daniel Kronauer, Sebastian Pohl, Griffin Burke	21-Mar-2013	Costa Rica	Heredia	Canton Sarapiqui	La Selva Biological Station	10.423	-84.022	17:00-19:30	Tropical rainforest	collected during host colony emigration	STR750
cvb399tetr006	Christoph von Beeren, Daniel Kronauer, Sebastian Pohl, Griffin Burke	21-Mar-2013	Costa Rica	Heredia	Canton Sarapiqui	La Selva Biological Station	10.423	-84.022	17:00-19:30	Tropical rainforest	collected during host colony emigration	STR750
cvb399tetr005	Christoph von Beeren, Daniel Kronauer, Sebastian Pohl, Griffin Burke	21-Mar-2013	Costa Rica	Heredia	Canton Sarapiqui	La Selva Biological Station	10.423	-84.022	17:00-19:30	Tropical rainforest	collected during host colony emigration	STR750
cvb250tetr007	Christoph von Beeren, Daniel Kronauer, Sebastian Pohl, Griffin Burke	10-Mar-2013	Costa Rica	Heredia	Canton Sarapiqui	La Selva Biological Station	10.423	-84.022	20:00-4:00	Tropical rainforest	collected during host colony emigration	CES550
cvb382tetr006	Christoph von Beeren, Daniel Kronauer, Sebastian Pohl, Griffin Burke	19-Mar-2013	Costa Rica	Heredia	Canton Sarapiqui	La Selva Biological Station	10.423	-84.022	18:00-21:00	Tropical rainforest	collected during host colony raid	STR50
cvb038tetr002	Christoph von Beeren, Daniel Kronauer, Sebastian Pohl, Griffin Burke	12-Feb-2013	Costa Rica	Heredia	Canton Sarapiqui	La Selva Biological Station	10.423	-84.022	19-04-2016	Tropical rainforest	collected during host colony emigration	Sendero Cantarana
cvb038tetr001	Christoph von Beeren, Daniel Kronauer, Sebastian Pohl, Griffin Burke	12-Feb-2013	Costa Rica	Heredia	Canton Sarapiqui	La Selva Biological Station	10.423	-84.022	19-04-2016	Tropical rainforest	collected during host colony emigration	Sendero Cantarana
cvb015tetr003	Christoph von Beeren, Daniel Kronauer, Sebastian Pohl, Griffin Burke	09-Feb-2013	Costa Rica	Heredia	Canton Sarapiqui	La Selva Biological Station	10.423	-84.022	18:20-3:21	Tropical rainforest	collected during host colony emigration	at station
cvb015tetr002	Christoph von Beeren, Daniel Kronauer, Sebastian Pohl, Griffin Burke	09-Feb-2013	Costa Rica	Heredia	Canton Sarapiqui	La Selva Biological Station	10.423	-84.022	18:20-3:21	Tropical rainforest	collected during host colony emigration	at station
cvb371tetr002	Christoph von Beeren, Daniel Kronauer, Sebastian Pohl, Griffin Burke	18-Mar-2013	Costa Rica	Heredia	Canton Sarapiqui	La Selva Biological Station	10.423	-84.022	19:00-0:30	Tropical rainforest	collected during host colony emigration	SURA150
cvb371tetr003	Christoph von Beeren, Daniel Kronauer, Sebastian Pohl, Griffin Burke	18-Mar-2013	Costa Rica	Heredia	Canton Sarapiqui	La Selva Biological Station	10.423	-84.022	19:00-0:30	Tropical rainforest	collected during host colony emigration	SURA150
cvb120tetr001	Christoph von Beeren, Daniel Kronauer, Sebastian Pohl, Griffin Burke	24-Feb-2013	Costa Rica	Heredia	Canton Sarapiqui	La Selva Biological Station	10.423	-84.022	19-04-2016	Tropical rainforest	collected during host colony raid	gate to La Selva
cvb038tetr006	Christoph von Beeren, Daniel Kronauer, Sebastian Pohl, Griffin Burke	12-Feb-2013	Costa Rica	Heredia	Canton Sarapiqui	La Selva Biological Station	10.423	-84.022	19-04-2016	Tropical rainforest	collected during host colony emigration	Sendero Cantarana
cvb038tetr005	Christoph von Beeren, Daniel Kronauer, Sebastian Pohl, Griffin Burke	12-Feb-2013	Costa Rica	Heredia	Canton Sarapiqui	La Selva Biological Station	10.423	-84.022	19-04-2016	Tropical rainforest	collected during host colony emigration	Sendero Cantarana
cvb038tetr004	Christoph von Beeren, Daniel Kronauer, Sebastian Pohl, Griffin Burke	12-Feb-2013	Costa Rica	Heredia	Canton Sarapiqui	La Selva Biological Station	10.423	-84.022	19-04-2016	Tropical rainforest	collected during host colony emigration	Sendero Cantarana
cvb007tetr003	Christoph von Beeren, Daniel Kronauer, Sebastian Pohl, Griffin Burke	08-Feb-2013	Costa Rica	Heredia	Canton Sarapiqui	La Selva Biological Station	10.423	-84.022	19-04-2016	Tropical rainforest	collected during host colony emigration	CCC350
cvb007tetr002	Christoph von Beeren, Daniel Kronauer, Sebastian Pohl, Griffin Burke	08-Feb-2013	Costa Rica	Heredia	Canton Sarapiqui	La Selva Biological Station	10.423	-84.022	19-04-2016	Tropical rainforest	collected during host colony emigration	CCC350
cvb371tetr007	Christoph von Beeren, Daniel Kronauer, Sebastian Pohl, Griffin Burke	18-Mar-2013	Costa Rica	Heredia	Canton Sarapiqui	La Selva Biological Station	10.423	-84.022	19:00-0:30	Tropical rainforest	collected during host colony emigration	SURA150
cvb250tetr008	Christoph von Beeren, Daniel Kronauer, Sebastian Pohl, Griffin Burke	10-Mar-2013	Costa Rica	Heredia	Canton Sarapiqui	La Selva Biological Station	10.423	-84.022	20:00-4:00	Tropical rainforest	collected during host colony emigration	CES550
cvb250tetr009	Christoph von Beeren, Daniel Kronauer, Sebastian Pohl, Griffin Burke	10-Mar-2013	Costa Rica	Heredia	Canton Sarapiqui	La Selva Biological Station	10.423	-84.022	20:00-4:00	Tropical rainforest	collected during host colony emigration	CES550
cvb423tetr001	Christoph von Beeren, Daniel Kronauer, Sebastian Pohl, Griffin Burke	23-Mar-2013	Costa Rica	Heredia	Canton Sarapiqui	La Selva Biological Station	10.423	-84.022	19-04-2016	Tropical rainforest	collected during host colony raid	STR750
cvb209tetr006	Christoph von Beeren, Daniel Kronauer, Sebastian Pohl, Griffin Burke	06-Mar-2013	Costa Rica	Heredia	Canton Sarapiqui	La Selva Biological Station	10.423	-84.022	20:00-24:00	Tropical rainforest	collected during host colony emigration	STR700
cvb308tetr009	Christoph von Beeren, Daniel Kronauer, Sebastian Pohl, Griffin Burke	16-Mar-2013	Costa Rica	Heredia	Canton Sarapiqui	La Selva Biological Station	10.423	-84.022	20:30-0:30	Tropical rainforest	collected during host colony emigration	STR1050
cvb435tetr001	Christoph von Beeren, Daniel Kronauer, Sebastian Pohl, Griffin Burke	25-Mar-2013	Costa Rica	Heredia	Canton Sarapiqui	La Selva Biological Station	10.423	-84.022	19-04-2016	Tropical rainforest	collected during host colony raid	SEDR100
cvb533tetr006	Christoph von Beeren, Daniel Kronauer, Sebastian Pohl, Griffin Burke	06-Apr-2013	Costa Rica	Heredia	Canton Sarapiqui	La Selva Biological Station	10.423	-84.022	19-04-2016	Tropical rainforest	collected during host colony raid	CEN150
cvb571tetr002	Christoph von Beeren, Daniel Kronauer, Sebastian Pohl, Griffin Burke	08-Apr-2013	Costa Rica	Heredia	Canton Sarapiqui	La Selva Biological Station	10.423	-84.022	16:30-23:15	Tropical rainforest	collected during host colony emigration	at station
cvb422tetr003	Christoph von Beeren, Daniel Kronauer, Sebastian Pohl, Griffin Burke	24-Mar-2013	Costa Rica	Heredia	Canton Sarapiqui	La Selva Biological Station	10.423	-84.022	19:30-1:30	Tropical rainforest	collected during host colony emigration	Sura700
cvb422tetr002	Christoph von Beeren, Daniel Kronauer, Sebastian Pohl, Griffin Burke	24-Mar-2013	Costa Rica	Heredia	Canton Sarapiqui	La Selva Biological Station	10.423	-84.022	19:30-1:30	Tropical rainforest	collected during host colony emigration	Sura700
cvb422tetr001	Christoph von Beeren, Daniel Kronauer, Sebastian Pohl, Griffin Burke	24-Mar-2013	Costa Rica	Heredia	Canton Sarapiqui	La Selva Biological Station	10.423	-84.022	19:30-1:30	Tropical rainforest	collected during host colony emigration	Sura700
cvb435tetr002	Christoph von Beeren, Daniel Kronauer, Sebastian Pohl, Griffin Burke	25-Mar-2013	Costa Rica	Heredia	Canton Sarapiqui	La Selva Biological Station	10.423	-84.022	19-04-2016	Tropical rainforest	collected during host colony raid	SEDR100
cvb529tetr002	Christoph von Beeren, Daniel Kronauer, Sebastian Pohl, Griffin Burke	06-Apr-2013	Costa Rica	Heredia	Canton Sarapiqui	La Selva Biological Station	10.423	-84.022	15:45-16:45	Tropical rainforest	collected during host colony raid	SURA50
cvb572tetr004	Christoph von Beeren, Daniel Kronauer, Sebastian Pohl, Griffin Burke	08-Apr-2013	Costa Rica	Heredia	Canton Sarapiqui	La Selva Biological Station	10.423	-84.022	16:30-23:15	Tropical rainforest	collected during host colony emigration	at station
cvb311tetr001	Christoph von Beeren, Daniel Kronauer, Sebastian Pohl, Griffin Burke	16-Mar-2013	Costa Rica	Heredia	Canton Sarapiqui	La Selva Biological Station	10.423	-84.022	19-04-2016	Tropical rainforest	collected during host colony emigration	STR1050
cvb210tetr001	Christoph von Beeren, Daniel Kronauer, Sebastian Pohl, Griffin Burke	08-Mar-2013	Costa Rica	Heredia	Canton Sarapiqui	La Selva Biological Station	10.423	-84.022	15:30-16:30	Tropical rainforest	collected during host colony raid	STR700
cvb249tetr005	Christoph von Beeren, Daniel Kronauer, Sebastian Pohl, Griffin Burke	10-Mar-2013	Costa Rica	Heredia	Canton Sarapiqui	La Selva Biological Station	10.423	-84.022	20:00-4:00	Tropical rainforest	collected during host colony emigration	CES550
cvb249tetr004	Christoph von Beeren, Daniel Kronauer, Sebastian Pohl, Griffin Burke	10-Mar-2013	Costa Rica	Heredia	Canton Sarapiqui	La Selva Biological Station	10.423	-84.022	20:00-4:00	Tropical rainforest	collected during host colony emigration	CES550
cvb176tetr002	Christoph von Beeren, Daniel Kronauer, Sebastian Pohl, Griffin Burke	03-Mar-2013	Costa Rica	Heredia	Canton Sarapiqui	La Selva Biological Station	10.423	-84.022	19-04-2016	Tropical rainforest	collected during host colony raid	cabina 5
cvb371tetr005	Christoph von Beeren, Daniel Kronauer, Sebastian Pohl, Griffin Burke	18-Mar-2013	Costa Rica	Heredia	Canton Sarapiqui	La Selva Biological Station	10.423	-84.022	19:00-0:30	Tropical rainforest	collected during host colony emigration	SURA150
cvb019tetr002	Christoph von Beeren, Daniel Kronauer, Sebastian Pohl, Griffin Burke	10-Feb-2013	Costa Rica	Heredia	Canton Sarapiqui	La Selva Biological Station	10.423	-84.022	17:45-3:00	Tropical rainforest	collected during host colony emigration	Sura 250
cvb019tetr001	Christoph von Beeren, Daniel Kronauer, Sebastian Pohl, Griffin Burke	10-Feb-2013	Costa Rica	Heredia	Canton Sarapiqui	La Selva Biological Station	10.423	-84.022	17:45-3:00	Tropical rainforest	collected during host colony emigration	Sura 250
cvb006tetr001	Christoph von Beeren, Daniel Kronauer, Sebastian Pohl, Griffin Burke	08-Feb-2013	Costa Rica	Heredia	Canton Sarapiqui	La Selva Biological Station	10.423	-84.022	19-04-2016	Tropical rainforest	collected during host colony emigration	CCC350
cvb007tetr004	Christoph von Beeren, Daniel Kronauer, Sebastian Pohl, Griffin Burke	08-Feb-2013	Costa Rica	Heredia	Canton Sarapiqui	La Selva Biological Station	10.423	-84.022	19-04-2016	Tropical rainforest	collected during host colony emigration	CCC350
cvb541tetr002	Christoph von Beeren, Daniel Kronauer, Sebastian Pohl, Griffin Burke	07-Apr-2013	Costa Rica	Heredia	Canton Sarapiqui	La Selva Biological Station	10.423	-84.022	17:00-20:00	Tropical rainforest	collected during host colony emigration	SURA550
cvb541tetr001	Christoph von Beeren, Daniel Kronauer, Sebastian Pohl, Griffin Burke	07-Apr-2013	Costa Rica	Heredia	Canton Sarapiqui	La Selva Biological Station	10.423	-84.022	17:00-20:00	Tropical rainforest	collected during host colony emigration	SURA550
cvb316tetr006	Christoph von Beeren, Daniel Kronauer, Sebastian Pohl, Griffin Burke	17-Mar-2013	Costa Rica	Heredia	Canton Sarapiqui	La Selva Biological Station	10.423	-84.022	21:30-0:30	Tropical rainforest	collected during host colony emigration	CCC300
cvb015tetr001	Christoph von Beeren, Daniel Kronauer, Sebastian Pohl, Griffin Burke	09-Feb-2013	Costa Rica	Heredia	Canton Sarapiqui	La Selva Biological Station	10.423	-84.022	18:20-3:21	Tropical rainforest	collected during host colony emigration	at station
cvb410tetr003	Christoph von Beeren, Daniel Kronauer, Sebastian Pohl, Griffin Burke	23-Mar-2013	Costa Rica	Heredia	Canton Sarapiqui	La Selva Biological Station	10.423	-84.022	17:00-0:30	Tropical rainforest	collected during host colony emigration	SURA700
cvb533tetr005	Christoph von Beeren, Daniel Kronauer, Sebastian Pohl, Griffin Burke	06-Apr-2013	Costa Rica	Heredia	Canton Sarapiqui	La Selva Biological Station	10.423	-84.022	19-04-2016	Tropical rainforest	collected during host colony raid	CEN150
cvb533tetr004	Christoph von Beeren, Daniel Kronauer, Sebastian Pohl, Griffin Burke	06-Apr-2013	Costa Rica	Heredia	Canton Sarapiqui	La Selva Biological Station	10.423	-84.022	19-04-2016	Tropical rainforest	collected during host colony raid	CEN150
cvb533tetr003	Christoph von Beeren, Daniel Kronauer, Sebastian Pohl, Griffin Burke	06-Apr-2013	Costa Rica	Heredia	Canton Sarapiqui	La Selva Biological Station	10.423	-84.022	19-04-2016	Tropical rainforest	collected during host colony raid	CEN150
cvb533tetr002	Christoph von Beeren, Daniel Kronauer, Sebastian Pohl, Griffin Burke	06-Apr-2013	Costa Rica	Heredia	Canton Sarapiqui	La Selva Biological Station	10.423	-84.022	19-04-2016	Tropical rainforest	collected during host colony raid	CEN150
cvb533tetr001	Christoph von Beeren, Daniel Kronauer, Sebastian Pohl, Griffin Burke	06-Apr-2013	Costa Rica	Heredia	Canton Sarapiqui	La Selva Biological Station	10.423	-84.022	19-04-2016	Tropical rainforest	collected during host colony raid	CEN150
cvb541tetr008	Christoph von Beeren, Daniel Kronauer, Sebastian Pohl, Griffin Burke	07-Apr-2013	Costa Rica	Heredia	Canton Sarapiqui	La Selva Biological Station	10.423	-84.022	17:00-20:00	Tropical rainforest	collected during host colony emigration	SURA550
cvb541tetr009	Christoph von Beeren, Daniel Kronauer, Sebastian Pohl, Griffin Burke	07-Apr-2013	Costa Rica	Heredia	Canton Sarapiqui	La Selva Biological Station	10.423	-84.022	17:00-20:00	Tropical rainforest	collected during host colony emigration	SURA550
cvb541tetr011	Christoph von Beeren, Daniel Kronauer, Sebastian Pohl, Griffin Burke	07-Apr-2013	Costa Rica	Heredia	Canton Sarapiqui	La Selva Biological Station	10.423	-84.022	17:00-20:00	Tropical rainforest	collected during host colony emigration	SURA550
cvb398tetr003	Christoph von Beeren, Daniel Kronauer, Sebastian Pohl, Griffin Burke	21-Mar-2013	Costa Rica	Heredia	Canton Sarapiqui	La Selva Biological Station	10.423	-84.022	23:00-0:30	Tropical rainforest	collected during host colony emigration	CCL550
cvb398tetr002	Christoph von Beeren, Daniel Kronauer, Sebastian Pohl, Griffin Burke	21-Mar-2013	Costa Rica	Heredia	Canton Sarapiqui	La Selva Biological Station	10.423	-84.022	23:00-0:30	Tropical rainforest	collected during host colony emigration	CCL550
cvb676tetr006	Christoph von Beeren, Daniel Kronauer, Sebastian Pohl, Griffin Burke	31-Mar-2014	Costa Rica	Heredia	Canton Sarapiqui	La Selva Biological Station	10.423	-84.022	20:15-22:10	Tropical rainforest	collected during host colony emigration	CEN
cvb676tetr010	Christoph von Beeren, Daniel Kronauer, Sebastian Pohl, Griffin Burke	31-Mar-2014	Costa Rica	Heredia	Canton Sarapiqui	La Selva Biological Station	10.423	-84.022	20:15-22:10	Tropical rainforest	collected during host colony emigration	CEN
cvb048tetr008	Christoph von Beeren, Daniel Kronauer, Sebastian Pohl, Griffin Burke	14-Feb-2013	Costa Rica	Heredia	Canton Sarapiqui	La Selva Biological Station	10.423	-84.022	23:00-5:00	Tropical rainforest	collected during host colony emigration	Trap to River Station
cvb048tetr009	Christoph von Beeren, Daniel Kronauer, Sebastian Pohl, Griffin Burke	14-Feb-2013	Costa Rica	Heredia	Canton Sarapiqui	La Selva Biological Station	10.423	-84.022	23:00-5:00	Tropical rainforest	collected during host colony emigration	Trap to River Station
cvb048tetr010	Christoph von Beeren, Daniel Kronauer, Sebastian Pohl, Griffin Burke	14-Feb-2013	Costa Rica	Heredia	Canton Sarapiqui	La Selva Biological Station	10.423	-84.022	23:00-5:00	Tropical rainforest	collected during host colony emigration	Trap to River Station
cvb316tetr008	Christoph von Beeren, Daniel Kronauer, Sebastian Pohl, Griffin Burke	17-Mar-2013	Costa Rica	Heredia	Canton Sarapiqui	La Selva Biological Station	10.423	-84.022	21:30-0:30	Tropical rainforest	collected during host colony emigration	CCC300
cvb316tetr011	Christoph von Beeren, Daniel Kronauer, Sebastian Pohl, Griffin Burke	17-Mar-2013	Costa Rica	Heredia	Canton Sarapiqui	La Selva Biological Station	10.423	-84.022	21:30-0:30	Tropical rainforest	collected during host colony emigration	CCC300
cvb433tetr007	Christoph von Beeren, Daniel Kronauer, Sebastian Pohl, Griffin Burke	25-Mar-2013	Costa Rica	Heredia	Canton Sarapiqui	La Selva Biological Station	10.423	-84.022	22:00-23:45	Tropical rainforest	collected during host colony emigration	SEDR100
cvb433tetr008	Christoph von Beeren, Daniel Kronauer, Sebastian Pohl, Griffin Burke	25-Mar-2013	Costa Rica	Heredia	Canton Sarapiqui	La Selva Biological Station	10.423	-84.022	22:00-23:45	Tropical rainforest	collected during host colony emigration	SEDR100
cvb433tetr010	Christoph von Beeren, Daniel Kronauer, Sebastian Pohl, Griffin Burke	25-Mar-2013	Costa Rica	Heredia	Canton Sarapiqui	La Selva Biological Station	10.423	-84.022	22:00-23:45	Tropical rainforest	collected during host colony emigration	SEDR100
cvb410tetr002	Christoph von Beeren, Daniel Kronauer, Sebastian Pohl, Griffin Burke	23-Mar-2013	Costa Rica	Heredia	Canton Sarapiqui	La Selva Biological Station	10.423	-84.022	17:00-0:30	Tropical rainforest	collected during host colony emigration	SURA700
cvb399tetr001	Christoph von Beeren, Daniel Kronauer, Sebastian Pohl, Griffin Burke	21-Mar-2013	Costa Rica	Heredia	Canton Sarapiqui	La Selva Biological Station	10.423	-84.022	17:00-19:30	Tropical rainforest	collected during host colony emigration	STR750
cvb410tetr001	Christoph von Beeren, Daniel Kronauer, Sebastian Pohl, Griffin Burke	23-Mar-2013	Costa Rica	Heredia	Canton Sarapiqui	La Selva Biological Station	10.423	-84.022	17:00-0:30	Tropical rainforest	collected during host colony emigration	SURA700
cvb038tetr015	Christoph von Beeren, Daniel Kronauer, Sebastian Pohl, Griffin Burke	12-Feb-2013	Costa Rica	Heredia	Canton Sarapiqui	La Selva Biological Station	10.423	-84.022	19-04-2016	Tropical rainforest	collected during host colony emigration	Sendero Cantarana
cvb382tetr001	Christoph von Beeren, Daniel Kronauer, Sebastian Pohl, Griffin Burke	19-Mar-2013	Costa Rica	Heredia	Canton Sarapiqui	La Selva Biological Station	10.423	-84.022	18:00-21:00	Tropical rainforest	collected during host colony raid	STR50
cvb038tetr016	Christoph von Beeren, Daniel Kronauer, Sebastian Pohl, Griffin Burke	12-Feb-2013	Costa Rica	Heredia	Canton Sarapiqui	La Selva Biological Station	10.423	-84.022	19-04-2016	Tropical rainforest	collected during host colony emigration	Sendero Cantarana
cvb097tetr010	Christoph von Beeren, Daniel Kronauer, Sebastian Pohl, Griffin Burke	19-Feb-2013	Costa Rica	Heredia	Canton Sarapiqui	La Selva Biological Station	10.423	-84.022	23:00-2:00	Tropical rainforest	collected during host colony emigration	CCl850
cvb433tetr011	Christoph von Beeren, Daniel Kronauer, Sebastian Pohl, Griffin Burke	25-Mar-2013	Costa Rica	Heredia	Canton Sarapiqui	La Selva Biological Station	10.423	-84.022	22:00-23:45	Tropical rainforest	collected during host colony emigration	SEDR100
cvb097tetr003	Christoph von Beeren, Daniel Kronauer, Sebastian Pohl, Griffin Burke	19-Feb-2013	Costa Rica	Heredia	Canton Sarapiqui	La Selva Biological Station	10.423	-84.022	23:00-2:00	Tropical rainforest	collected during host colony emigration	CCl850
cvb097tetr002	Christoph von Beeren, Daniel Kronauer, Sebastian Pohl, Griffin Burke	19-Feb-2013	Costa Rica	Heredia	Canton Sarapiqui	La Selva Biological Station	10.423	-84.022	23:00-2:00	Tropical rainforest	collected during host colony emigration	CCl850
cvb097tetr001	Christoph von Beeren, Daniel Kronauer, Sebastian Pohl, Griffin Burke	19-Feb-2013	Costa Rica	Heredia	Canton Sarapiqui	La Selva Biological Station	10.423	-84.022	23:00-2:00	Tropical rainforest	collected during host colony emigration	CCl850
cvb104tetr004	Christoph von Beeren, Daniel Kronauer, Sebastian Pohl, Griffin Burke	21-Feb-2013	Costa Rica	Heredia	Canton Sarapiqui	La Selva Biological Station	10.423	-84.022	17:30-18:30; 19:30-20:30	Tropical rainforest	collected during host colony emigration	track to estacion del rio
cvb104tetr003	Christoph von Beeren, Daniel Kronauer, Sebastian Pohl, Griffin Burke	21-Feb-2013	Costa Rica	Heredia	Canton Sarapiqui	La Selva Biological Station	10.423	-84.022	17:30-18:30; 19:30-20:30	Tropical rainforest	collected during host colony emigration	track to estacion del rio
cvb104tetr002	Christoph von Beeren, Daniel Kronauer, Sebastian Pohl, Griffin Burke	21-Feb-2013	Costa Rica	Heredia	Canton Sarapiqui	La Selva Biological Station	10.423	-84.022	17:30-18:30; 19:30-20:30	Tropical rainforest	collected during host colony emigration	track to estacion del rio
cvb451tetr008	Christoph von Beeren, Daniel Kronauer, Sebastian Pohl, Griffin Burke	29-Mar-2013	Costa Rica	Heredia	Canton Sarapiqui	La Selva Biological Station	10.423	-84.022	17:40-21:45	Tropical rainforest	collected during host colony emigration	STR650
cvb571tetr001	Christoph von Beeren, Daniel Kronauer, Sebastian Pohl, Griffin Burke	08-Apr-2013	Costa Rica	Heredia	Canton Sarapiqui	La Selva Biological Station	10.423	-84.022	16:30-23:15	Tropical rainforest	collected during host colony emigration	at station
cvb320tetr003	Christoph von Beeren, Daniel Kronauer, Sebastian Pohl, Griffin Burke	17-Mar-2013	Costa Rica	Heredia	Canton Sarapiqui	La Selva Biological Station	10.423	-84.022	20:30-21:00	Tropical rainforest	collected during host colony emigration	STR1050
cvb320tetr002	Christoph von Beeren, Daniel Kronauer, Sebastian Pohl, Griffin Burke	17-Mar-2013	Costa Rica	Heredia	Canton Sarapiqui	La Selva Biological Station	10.423	-84.022	20:30-21:00	Tropical rainforest	collected during host colony emigration	STR1050
cvb320tetr001	Christoph von Beeren, Daniel Kronauer, Sebastian Pohl, Griffin Burke	17-Mar-2013	Costa Rica	Heredia	Canton Sarapiqui	La Selva Biological Station	10.423	-84.022	20:30-21:00	Tropical rainforest	collected during host colony emigration	STR1050
cvb249tetr003	Christoph von Beeren, Daniel Kronauer, Sebastian Pohl, Griffin Burke	10-Mar-2013	Costa Rica	Heredia	Canton Sarapiqui	La Selva Biological Station	10.423	-84.022	20:00-4:00	Tropical rainforest	collected during host colony emigration	CES550
cvb249tetr002	Christoph von Beeren, Daniel Kronauer, Sebastian Pohl, Griffin Burke	10-Mar-2013	Costa Rica	Heredia	Canton Sarapiqui	La Selva Biological Station	10.423	-84.022	20:00-4:00	Tropical rainforest	collected during host colony emigration	CES550
cvb249tetr001	Christoph von Beeren, Daniel Kronauer, Sebastian Pohl, Griffin Burke	10-Mar-2013	Costa Rica	Heredia	Canton Sarapiqui	La Selva Biological Station	10.423	-84.022	20:00-4:00	Tropical rainforest	collected during host colony emigration	CES550
cvb705tetr001	Christoph von Beeren, Daniel Kronauer, Sebastian Pohl, Griffin Burke	09-Apr-2014	Costa Rica	Heredia	Canton Sarapiqui	La Selva Biological Station	10.423	-84.022	21:00-23:15	Tropical rainforest	collected during host colony raid	CES350
cvb705tetr002	Christoph von Beeren, Daniel Kronauer, Sebastian Pohl, Griffin Burke	09-Apr-2014	Costa Rica	Heredia	Canton Sarapiqui	La Selva Biological Station	10.423	-84.022	21:00-23:15	Tropical rainforest	collected during host colony raid	CES350
cvb513tetr003	Christoph von Beeren, Daniel Kronauer, Sebastian Pohl, Griffin Burke	04-Apr-2013	Costa Rica	Heredia	Canton Sarapiqui	La Selva Biological Station	10.423	-84.022	19-04-2016	Tropical rainforest	collected in host refuse deposit	at the station
cvb713tetr001	Christoph von Beeren, Daniel Kronauer, Sebastian Pohl, Griffin Burke	13-Apr-2014	Costa Rica	Heredia	Canton Sarapiqui	La Selva Biological Station	10.423	-84.022	19-04-2016	Tropical rainforest	collected during host colony raid	CES350
cvb713tetr002	Christoph von Beeren, Daniel Kronauer, Sebastian Pohl, Griffin Burke	13-Apr-2014	Costa Rica	Heredia	Canton Sarapiqui	La Selva Biological Station	10.423	-84.022	19-04-2016	Tropical rainforest	collected during host colony raid	CES350
cvb048tetr001	Christoph von Beeren, Daniel Kronauer, Sebastian Pohl, Griffin Burke	14-Feb-2013	Costa Rica	Heredia	Canton Sarapiqui	La Selva Biological Station	10.423	-84.022	23:00-5:00	Tropical rainforest	collected during host colony emigration	Trap to River Station
cvb716tetr001	Christoph von Beeren, Daniel Kronauer, Sebastian Pohl, Griffin Burke	12-Apr-2014	Costa Rica	Heredia	Canton Sarapiqui	La Selva Biological Station	10.423	-84.022	20:00-02:00	Tropical rainforest	collected during host colony emigration	CES600-700
cvb716tetr002	Christoph von Beeren, Daniel Kronauer, Sebastian Pohl, Griffin Burke	12-Apr-2014	Costa Rica	Heredia	Canton Sarapiqui	La Selva Biological Station	10.423	-84.022	20:00-02:00	Tropical rainforest	collected during host colony emigration	CES600-700
cvb713tetr003	Christoph von Beeren, Daniel Kronauer, Sebastian Pohl, Griffin Burke	13-Apr-2014	Costa Rica	Heredia	Canton Sarapiqui	La Selva Biological Station	10.423	-84.022	19-04-2016	Tropical rainforest	collected during host colony raid	CES350
cvb713tetr004	Christoph von Beeren, Daniel Kronauer, Sebastian Pohl, Griffin Burke	13-Apr-2014	Costa Rica	Heredia	Canton Sarapiqui	La Selva Biological Station	10.423	-84.022	19-04-2016	Tropical rainforest	collected during host colony raid	CES350
cvb410tetr004	Christoph von Beeren, Daniel Kronauer, Sebastian Pohl, Griffin Burke	23-Mar-2013	Costa Rica	Heredia	Canton Sarapiqui	La Selva Biological Station	10.423	-84.022	17:00-0:30	Tropical rainforest	collected during host colony emigration	SURA700
cvb499tetr002	Christoph von Beeren, Daniel Kronauer, Sebastian Pohl, Griffin Burke	03-Apr-2013	Costa Rica	Heredia	Canton Sarapiqui	La Selva Biological Station	10.423	-84.022	22:00-23:30	Tropical rainforest	collected during host colony emigration	SURA0
cvb100tetr006	Christoph von Beeren, Daniel Kronauer, Sebastian Pohl, Griffin Burke	19-Feb-2013	Costa Rica	Heredia	Canton Sarapiqui	La Selva Biological Station	10.423	-84.022	23:00-2:00	Tropical rainforest	collected during host colony emigration	CCl850
cvb038tetr007	Christoph von Beeren, Daniel Kronauer, Sebastian Pohl, Griffin Burke	12-Feb-2013	Costa Rica	Heredia	Canton Sarapiqui	La Selva Biological Station	10.423	-84.022	19-04-2016	Tropical rainforest	collected during host colony emigration	Sendero Cantarana
cvb038tetr008	Christoph von Beeren, Daniel Kronauer, Sebastian Pohl, Griffin Burke	12-Feb-2013	Costa Rica	Heredia	Canton Sarapiqui	La Selva Biological Station	10.423	-84.022	19-04-2016	Tropical rainforest	collected during host colony emigration	Sendero Cantarana
cvb038tetr009	Christoph von Beeren, Daniel Kronauer, Sebastian Pohl, Griffin Burke	12-Feb-2013	Costa Rica	Heredia	Canton Sarapiqui	La Selva Biological Station	10.423	-84.022	19-04-2016	Tropical rainforest	collected during host colony emigration	Sendero Cantarana
cvb038tetr011	Christoph von Beeren, Daniel Kronauer, Sebastian Pohl, Griffin Burke	12-Feb-2013	Costa Rica	Heredia	Canton Sarapiqui	La Selva Biological Station	10.423	-84.022	19-04-2016	Tropical rainforest	collected during host colony emigration	Sendero Cantarana
cvb015tetr006	Christoph von Beeren, Daniel Kronauer, Sebastian Pohl, Griffin Burke	09-Feb-2013	Costa Rica	Heredia	Canton Sarapiqui	La Selva Biological Station	10.423	-84.022	18:20-3:21	Tropical rainforest	collected during host colony emigration	at laboratories
cvb015tetr007	Christoph von Beeren, Daniel Kronauer, Sebastian Pohl, Griffin Burke	09-Feb-2013	Costa Rica	Heredia	Canton Sarapiqui	La Selva Biological Station	10.423	-84.022	18:20-3:21	Tropical rainforest	collected during host colony emigration	at laboratories
cvb015tetr008	Christoph von Beeren, Daniel Kronauer, Sebastian Pohl, Griffin Burke	09-Feb-2013	Costa Rica	Heredia	Canton Sarapiqui	La Selva Biological Station	10.423	-84.022	18:20-3:21	Tropical rainforest	collected during host colony emigration	at laboratories
cvb213tetr001	Christoph von Beeren, Daniel Kronauer, Sebastian Pohl, Griffin Burke	08-Mar-2013	Costa Rica	Heredia	Canton Sarapiqui	La Selva Biological Station	10.423	-84.022	20:30-21:30	Tropical rainforest	collected during host colony raid	STR700
cvb209tetr001	Christoph von Beeren, Daniel Kronauer, Sebastian Pohl, Griffin Burke	06-Mar-2013	Costa Rica	Heredia	Canton Sarapiqui	La Selva Biological Station	10.423	-84.022	20:00-24:00	Tropical rainforest	collected during host colony emigration	STR700
cvb371tetr001	Christoph von Beeren, Daniel Kronauer, Sebastian Pohl, Griffin Burke	18-Mar-2013	Costa Rica	Heredia	Canton Sarapiqui	La Selva Biological Station	10.423	-84.022	19:00-0:30	Tropical rainforest	collected during host colony emigration	SURA150
cvb689tetr001	Christoph von Beeren, Daniel Kronauer, Sebastian Pohl, Griffin Burke	04-Apr-2014	Costa Rica	Heredia	Canton Sarapiqui	La Selva Biological Station	10.423	-84.022	22:00-0:45	Tropical rainforest	collected during host colony emigration	CCC840
cvb158tetr003	Christoph von Beeren, Daniel Kronauer, Sebastian Pohl, Griffin Burke	02-Mar-2013	Costa Rica	Heredia	Canton Sarapiqui	La Selva Biological Station	10.423	-84.022	20:00-2:30	Tropical rainforest	collected during host colony emigration
cvb676tetr004	Christoph von Beeren, Daniel Kronauer, Sebastian Pohl, Griffin Burke	31-Mar-2014	Costa Rica	Heredia	Canton Sarapiqui	La Selva Biological Station	10.423	-84.022	20:15-22:10	Tropical rainforest	collected during host colony emigration	CEN
cvb158tetr002	Christoph von Beeren, Daniel Kronauer, Sebastian Pohl, Griffin Burke	02-Mar-2013	Costa Rica	Heredia	Canton Sarapiqui	La Selva Biological Station	10.423	-84.022	20:00-2:30	Tropical rainforest	collected during host colony emigration
cvb158tetr001	Christoph von Beeren, Daniel Kronauer, Sebastian Pohl, Griffin Burke	02-Mar-2013	Costa Rica	Heredia	Canton Sarapiqui	La Selva Biological Station	10.423	-84.022	20:00-2:30	Tropical rainforest	collected during host colony emigration
cvb676tetr001	Christoph von Beeren, Daniel Kronauer, Sebastian Pohl, Griffin Burke	31-Mar-2014	Costa Rica	Heredia	Canton Sarapiqui	La Selva Biological Station	10.423	-84.022	20:15-22:10	Tropical rainforest	collected during host colony emigration	CEN
cvb606tetr005	Christoph von Beeren, Daniel Kronauer, Sebastian Pohl, Griffin Burke	23-Mar-2014	Costa Rica	Heredia	Canton Sarapiqui	La Selva Biological Station	10.423	-84.022	19:00-22:00	Tropical rainforest	collected during host colony emigration	Suax
cvb371tetr004	Christoph von Beeren, Daniel Kronauer, Sebastian Pohl, Griffin Burke	18-Mar-2013	Costa Rica	Heredia	Canton Sarapiqui	La Selva Biological Station	10.423	-84.022	19:00-0:30	Tropical rainforest	collected during host colony emigration	SURA150
cvb010tetr004	Christoph von Beeren, Daniel Kronauer, Sebastian Pohl, Griffin Burke	08-Feb-2013	Costa Rica	Heredia	Canton Sarapiqui	La Selva Biological Station	10.423	-84.022	19-04-2016	Tropical rainforest	collected during host colony emigration	CCC
cvb104tetr008	Christoph von Beeren, Daniel Kronauer, Sebastian Pohl, Griffin Burke	21-Feb-2013	Costa Rica	Heredia	Canton Sarapiqui	La Selva Biological Station	10.423	-84.022	17:30-18:30; 19:30-20:30	Tropical rainforest	collected during host colony emigration	Trail to estacion del rio
cvb399tetr003	Christoph von Beeren, Daniel Kronauer, Sebastian Pohl, Griffin Burke	21-Mar-2013	Costa Rica	Heredia	Canton Sarapiqui	La Selva Biological Station	10.423	-84.022	17:00-19:30	Tropical rainforest	collected during host colony emigration	STR750
cvb572tetr005	Christoph von Beeren, Daniel Kronauer, Sebastian Pohl, Griffin Burke	08-Apr-2013	Costa Rica	Heredia	Canton Sarapiqui	La Selva Biological Station	10.423	-84.022	16:30-23:15	Tropical rainforest	collected during host colony emigration	at station
cvb572tetr008	Christoph von Beeren, Daniel Kronauer, Sebastian Pohl, Griffin Burke	08-Apr-2013	Costa Rica	Heredia	Canton Sarapiqui	La Selva Biological Station	10.423	-84.022	16:30-23:15	Tropical rainforest	collected during host colony emigration	at station
cvb572tetr007	Christoph von Beeren, Daniel Kronauer, Sebastian Pohl, Griffin Burke	08-Apr-2013	Costa Rica	Heredia	Canton Sarapiqui	La Selva Biological Station	10.423	-84.022	16:30-23:15	Tropical rainforest	collected during host colony emigration	at station
cvb004tetr001	Christoph von Beeren, Daniel Kronauer, Sebastian Pohl, Griffin Burke	07-Feb-2013	Costa Rica	Heredia	Canton Sarapiqui	La Selva Biological Station	10.423	-84.022		Tropical rainforest	collected during host colony raid	SHO500
cvb048tetr006	Christoph von Beeren, Daniel Kronauer, Sebastian Pohl, Griffin Burke	14-Feb-2013	Costa Rica	Heredia	Canton Sarapiqui	La Selva Biological Station	10.423	-84.022	23:00-5:00	Tropical rainforest	collected during host colony emigration	Trap to River Station
cvb399tetr008	Christoph von Beeren, Daniel Kronauer, Sebastian Pohl, Griffin Burke	21-Mar-2013	Costa Rica	Heredia	Canton Sarapiqui	La Selva Biological Station	10.423	-84.022	17:00-19:30	Tropical rainforest	collected during host colony emigration	STR750

## Sheet: Specimens analyzed per colony
Number of Tetradonia specimens analyzed per colony. We attempted to cover the whole morphological diversity of Tetradonia beetles in a given colony. Abbreviations: EB = Eciton burchellii foreli, ED = Eciton dulcium crassinode, EH = Eciton hamatum, EL = Eciton lucanoides conquistador, EM = Eciton mexicanum s.str., EV = Eciton vagans angustatum
Host species	Host colony ID	Tetradonia specimens analyzed			Number of Tetradonia specimens per Eciton colony
Eciton burchellii foreli	EB01	16				All host colonies	EB	ED	EH	EL	EM	EV
Eciton burchellii foreli	EB10	9			Number of colonies	52	13	10	13	3	7	6
Eciton burchellii foreli	EB11	8			Minimum number	1	2	1	1	6	1	1
Eciton burchellii foreli	EB12	6			Maximum number	21	16	7	21	10	12	6
Eciton burchellii foreli	EB17	2			Sum	357	99	48	120	25	42	23
Eciton burchellii foreli	EB02	5			Mean	6.86538	7.61538	4.8	9.23077	8.33333	6	3.83333
Eciton burchellii foreli	EB03	10			Std. error	0.514517	0.930526	0.61101	1.25654	1.20185	1.25357	0.872417
Eciton burchellii foreli	EB04	8			Variance	13.7658	11.2564	3.73333	20.5256	4.33333	11	4.56667
Eciton burchellii foreli	EB05	6			Stand. dev	3.71023	3.35506	1.93218	4.53052	2.08167	3.31663	2.13698
Eciton burchellii foreli	EB06	9			Median	6	8	5	10	9	5	4
Eciton burchellii foreli	EB07	5			25 prcntil	5	5.5	4.25	6.5	6	5	1.75
Eciton burchellii foreli	EB08	9			75 prcntil	9	9	6.25	10	10	7	6
Eciton burchellii foreli	EB09	6			Skewness	1.1166	1.00555	-1.0351	1.01704	-1.29334	0.575613	-0.232268
Eciton dulcium crassinode	ED01	7			Kurtosis	3.27886	2.70411	0.65461	4.00631	-2.33333	2.0281	-2.14982
Eciton dulcium crassinode	ED10	5			Geom. mean	5.73478	6.90173	4.2308	7.85942	8.14325	4.9566	3.2031
Eciton dulcium crassinode	ED11	6			Coeff. var	54.0426	44.0563	40.2538	49.0807	24.98	55.2771	55.7472
Eciton dulcium crassinode	ED02	5
Eciton dulcium crassinode	ED03	5
Eciton dulcium crassinode	ED05	5
Eciton dulcium crassinode	ED06	2
Eciton dulcium crassinode	ED07	1
Eciton dulcium crassinode	ED08	5
Eciton dulcium crassinode	ED09	7
Eciton hamatum	EH10	10
Eciton hamatum	EH11	5
Eciton hamatum	EH12	10
Eciton hamatum	EH13	10
Eciton hamatum	EH14	10
Eciton hamatum	EH02	1
Eciton hamatum	EH03	21
Eciton hamatum	EH04	10
Eciton hamatum	EH05	6
Eciton hamatum	EH06	9
Eciton hamatum	EH07	11
Eciton hamatum	EH08	10
Eciton hamatum	EH09	7
Eciton lucanoides conquistador	EL01	9
Eciton lucanoides conquistador	EL02	10
Eciton lucanoides conquistador	EL03	6
Eciton mexicanum s.str.	EM01	5
Eciton mexicanum s.str.	EM10	7
Eciton mexicanum s.str.	EM11	7
Eciton mexicanum s.str.	EM12	1
Eciton mexicanum s.str.	EM13	5
Eciton mexicanum s.str.	EM06	12
Eciton mexicanum s.str.	EM09	5
Eciton mexicanum s.str.	EV03	3
Eciton mexicanum s.str.	EV04	1
Eciton mexicanum s.str.	EV05	2
Eciton mexicanum s.str.	EV06	5
Eciton mexicanum s.str.	EV08	6
Eciton mexicanum s.str.	EV09	6
